# Supplementary material
Source: PubMed Central journal article supplement (PMC2525680)

**Haag-Liautard et al.**

**Direct estimation of the mitochondrial DNA mutation rate in  
*Drosophila melanogaster***

**Supplementary Material**

Position: 1,675

T T T A T <sup>60</sup> A G T T A T A C C  
M85: WT

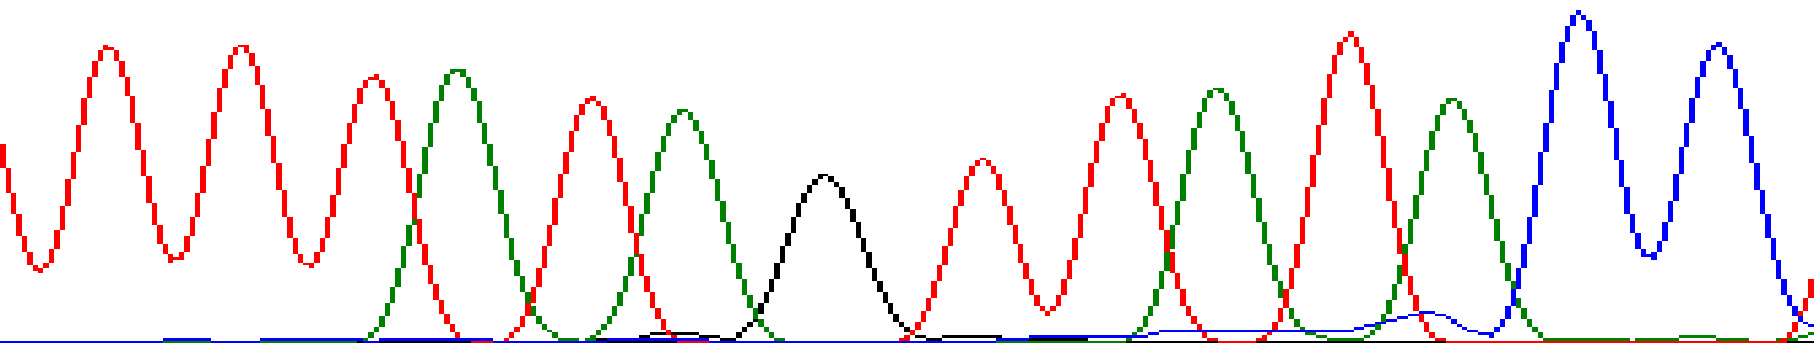

T T T T A T <sup>60</sup> A N T T A T A C C  
M79: G→A

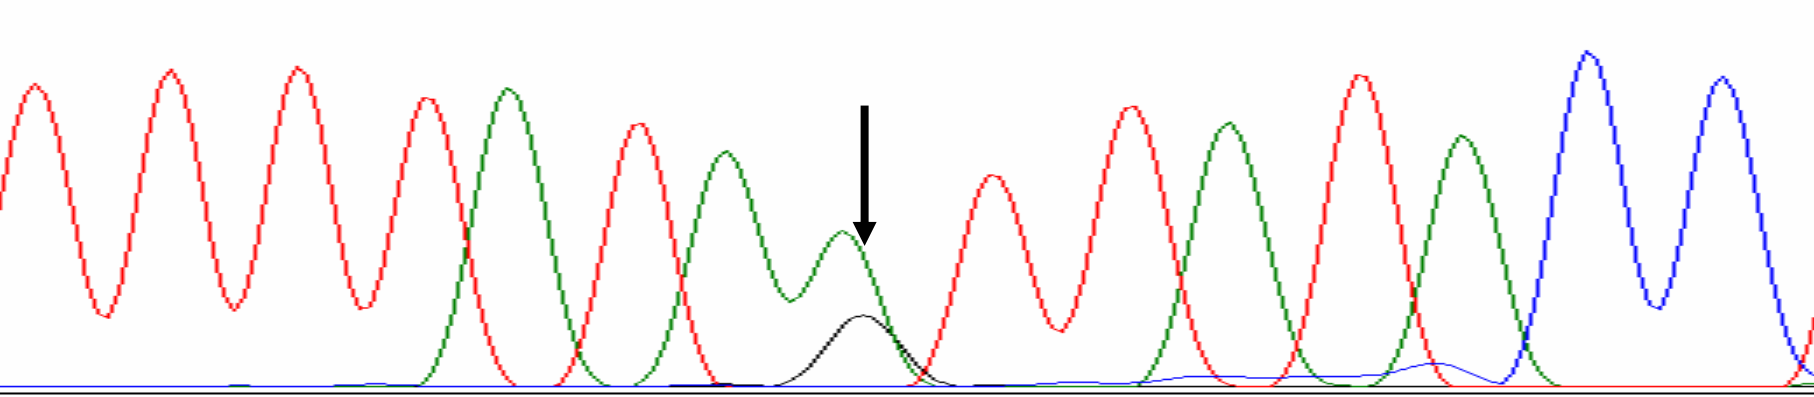

Position: 2,693

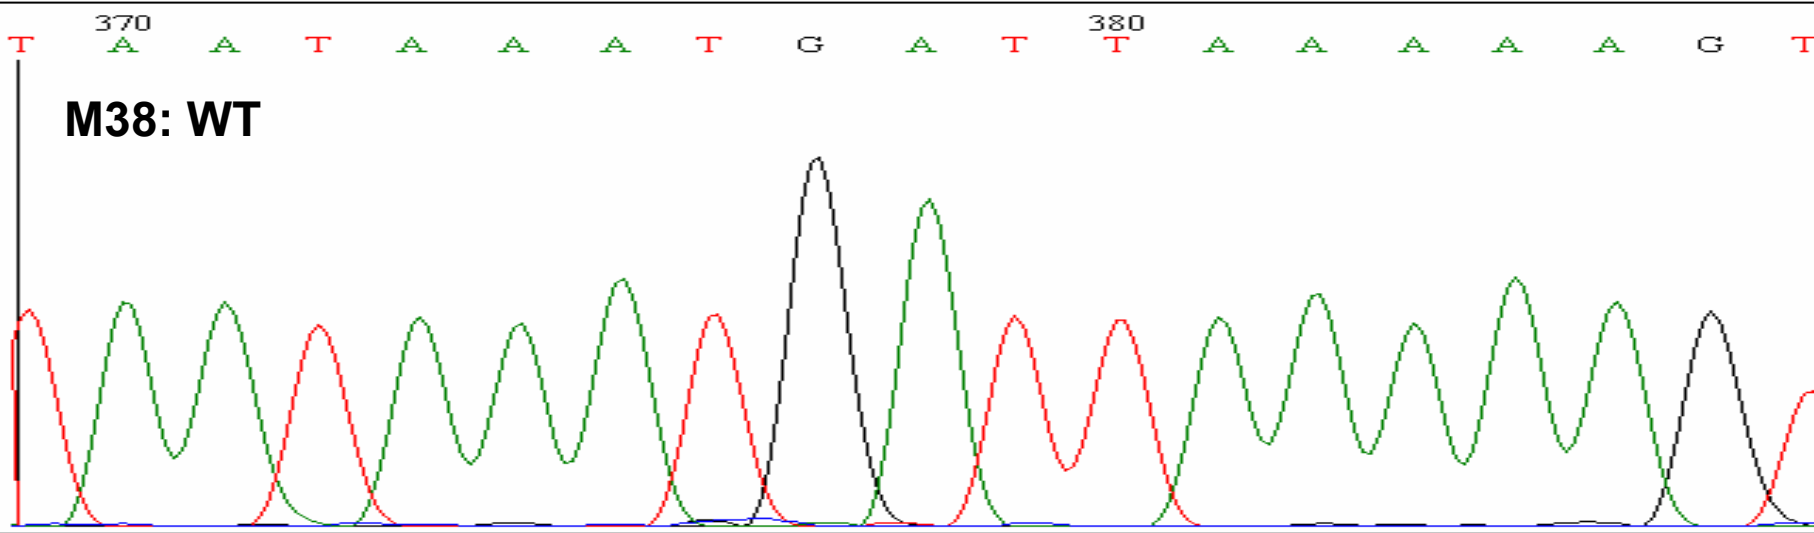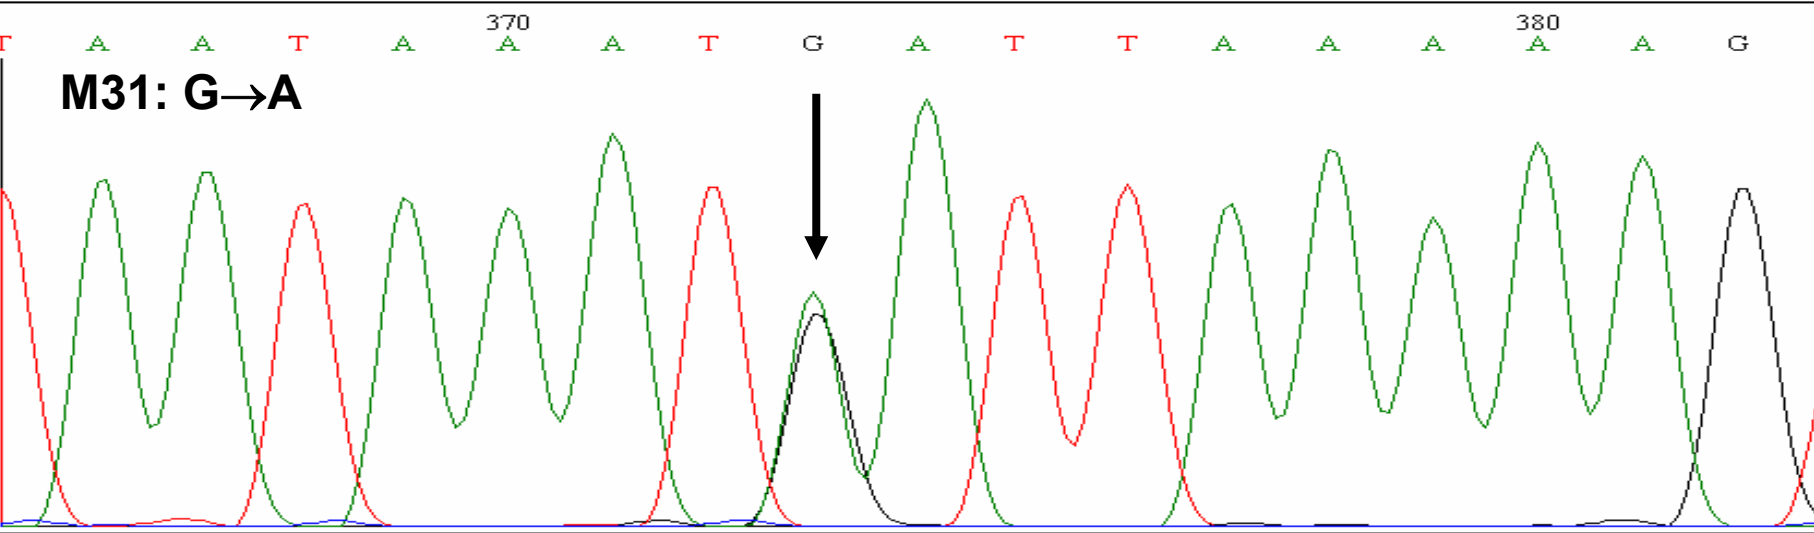

Position: 2,875

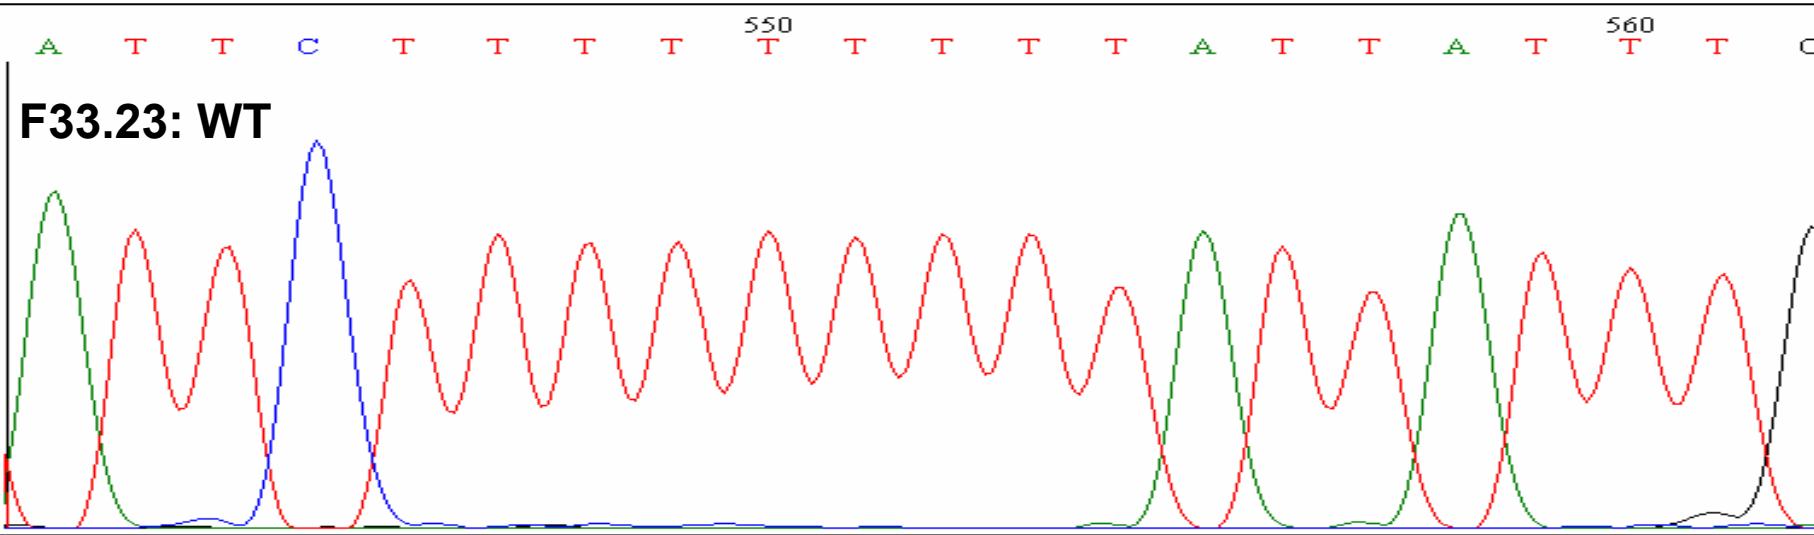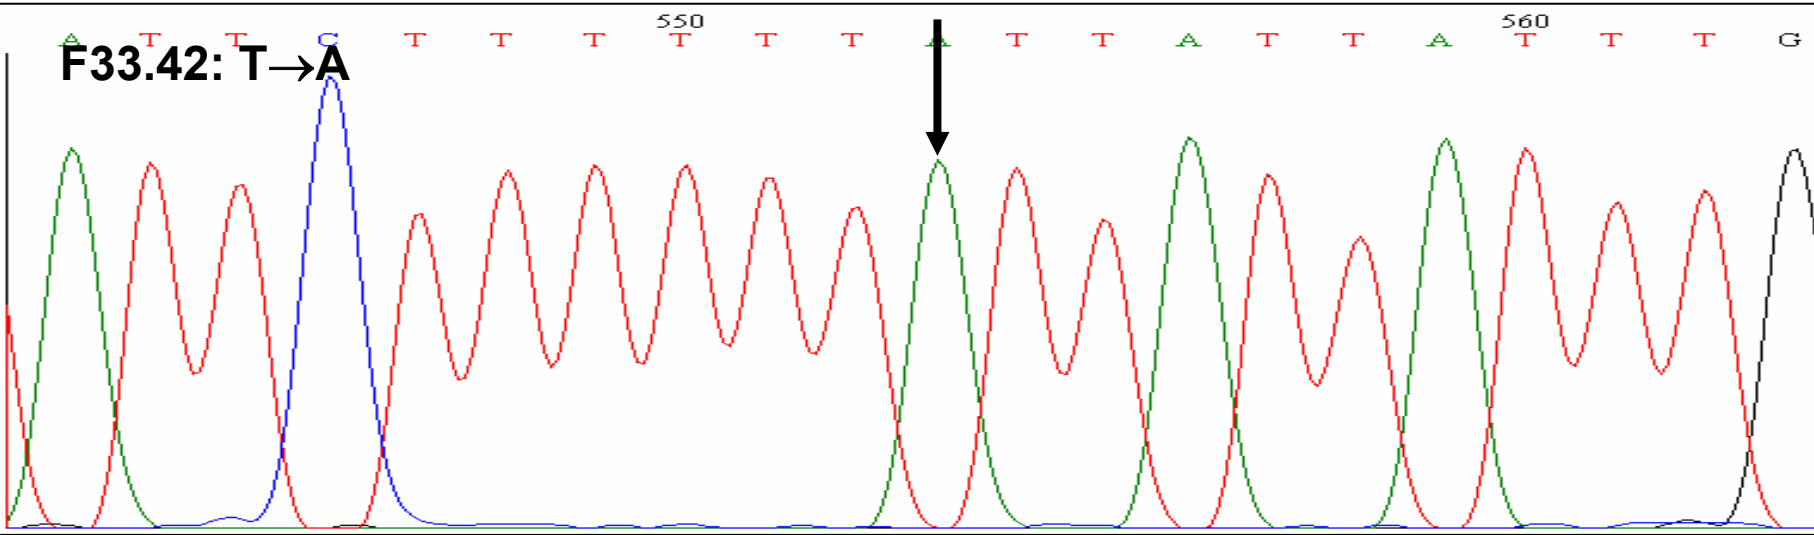

Position: 2,877

A G G A A T T T T A T T C T T T T T T T T T A T T A T T T G A G A A A G T T T A

M66: WT

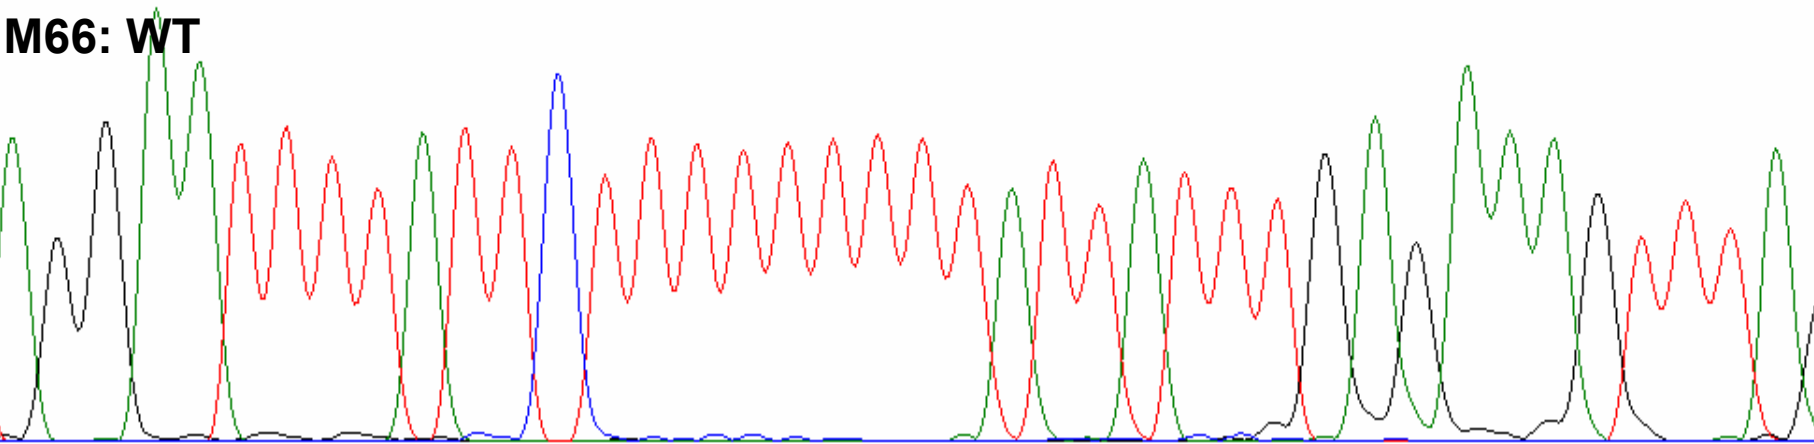

A G G A A T T T T A T T C T T T T T T T T T A T T A T T N G A G A A A G T T T A G T

M76: T<sub>9</sub> → T<sub>8</sub>

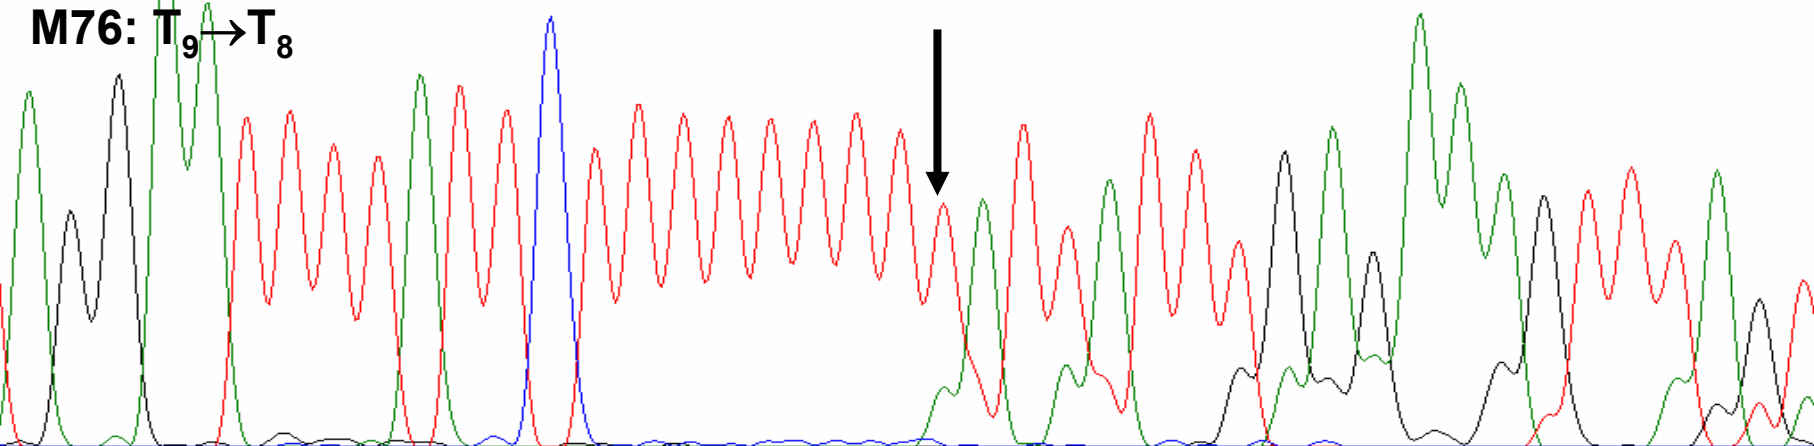

Position: 2,877

540 550 560 570  
A G G A A T T T T A T T C T T T T T T T T T A T T A T T T G A G A A A G T T T A

M66: WT



540 550 560 570  
A G G A A T T T T A T T C T T T T T T T T T A N T A N T T G G N N A A G G T T A N G

M144: T<sub>9</sub> → T<sub>8</sub>

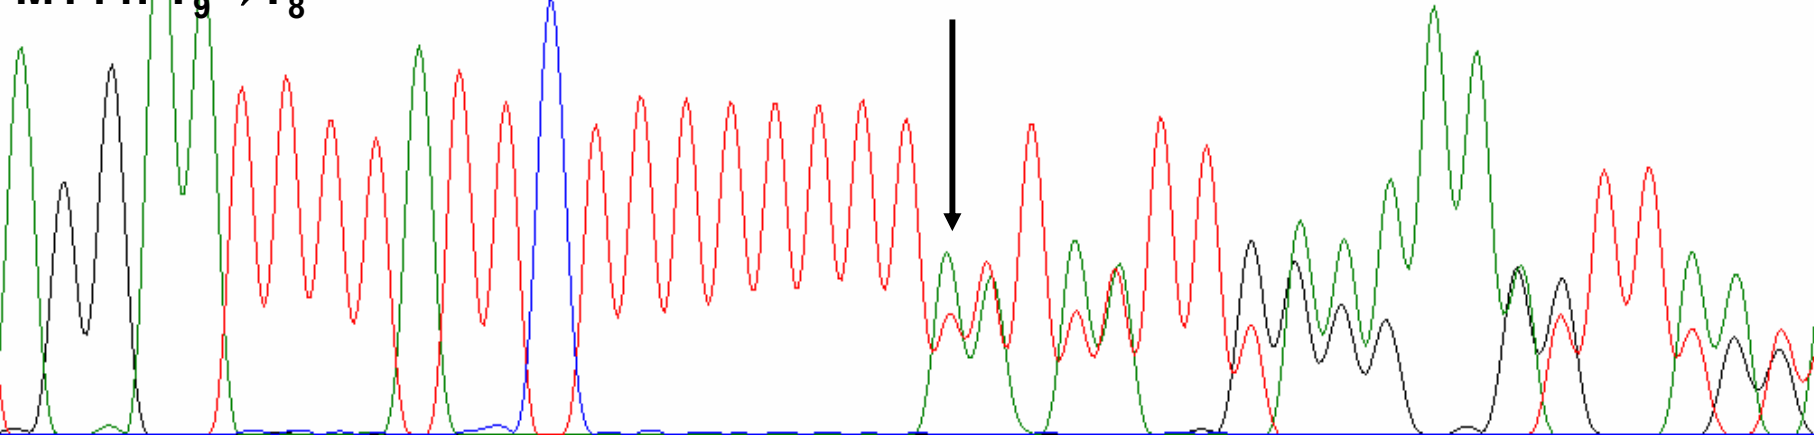

Position: 3,254

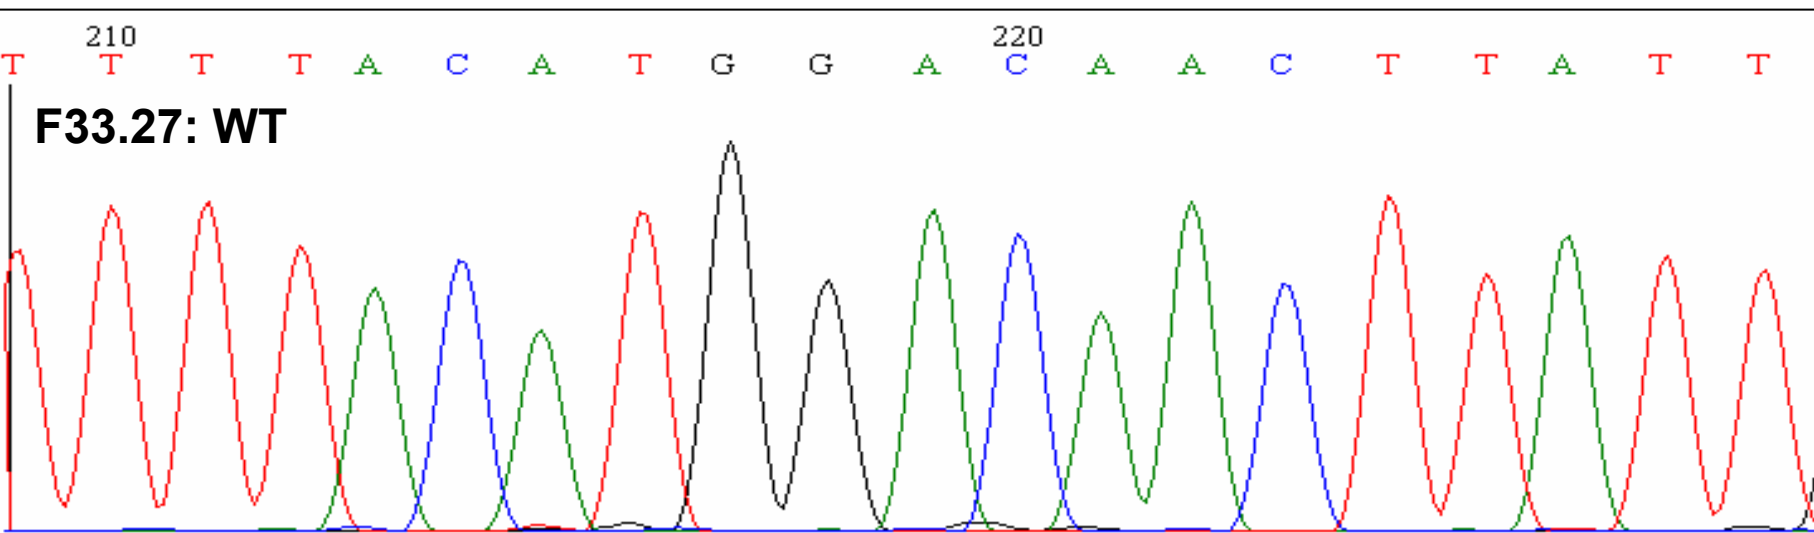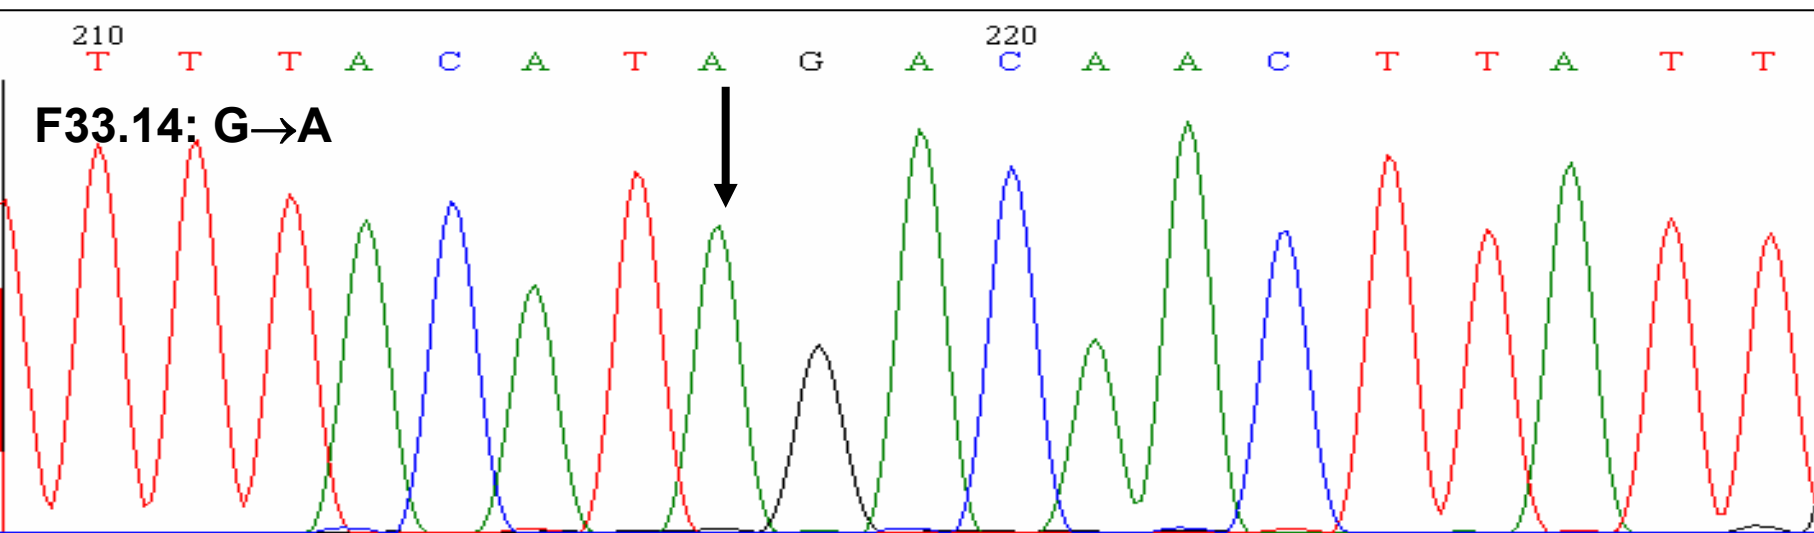

Position: 4,098

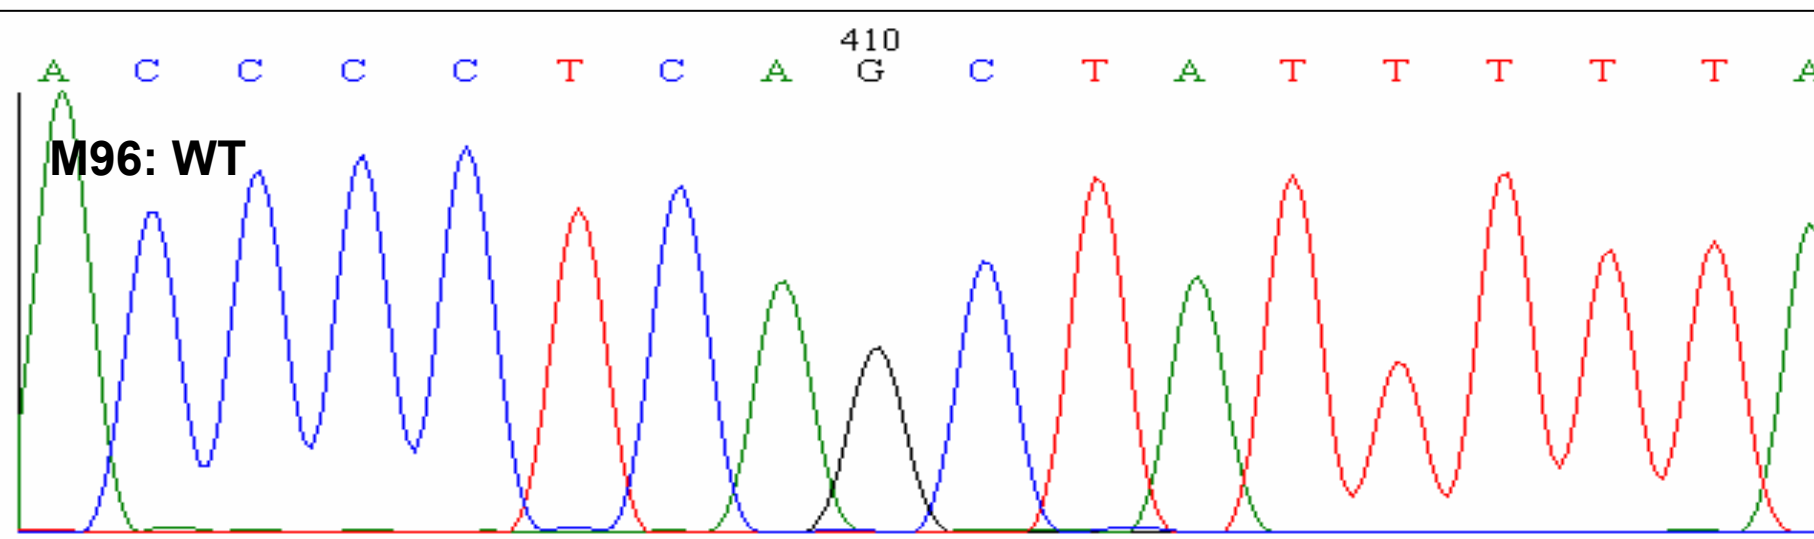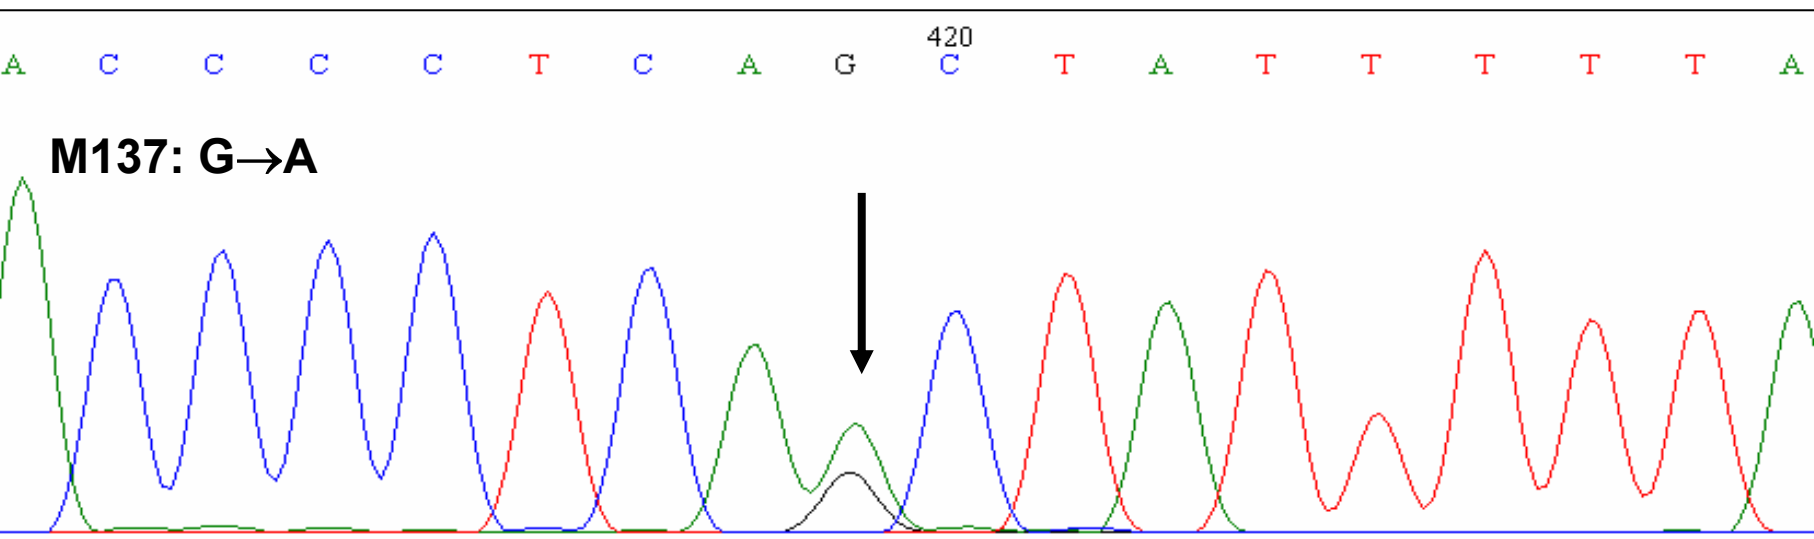



Position: 4,308

T C A T T A A T T T T A T T T A A T A A T T T C A

M159: WT

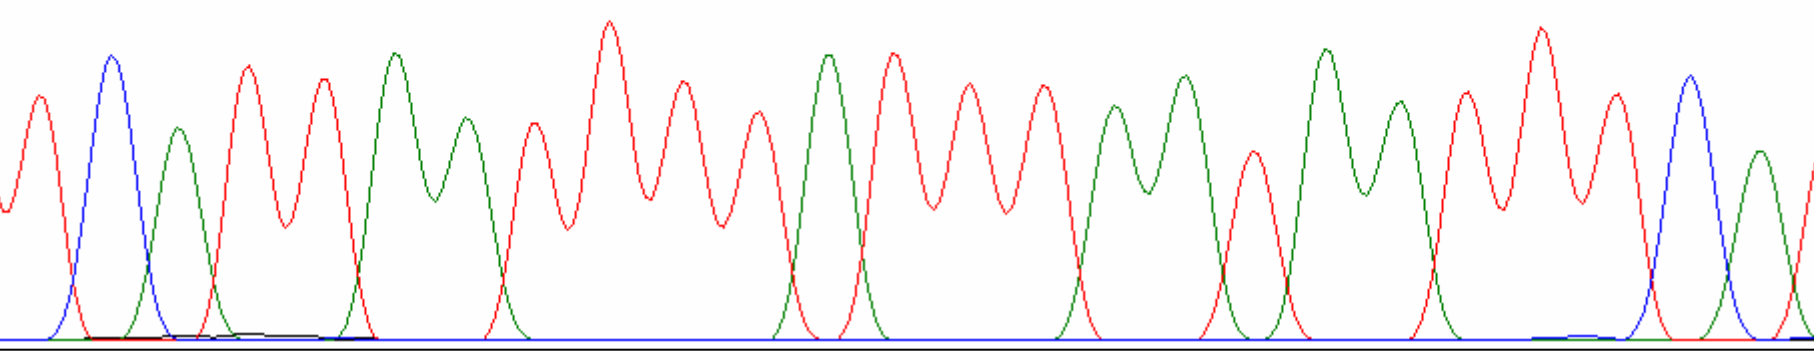

T C A T T A A T T T T A T T T A A T A A T T T C A

M142: A→T

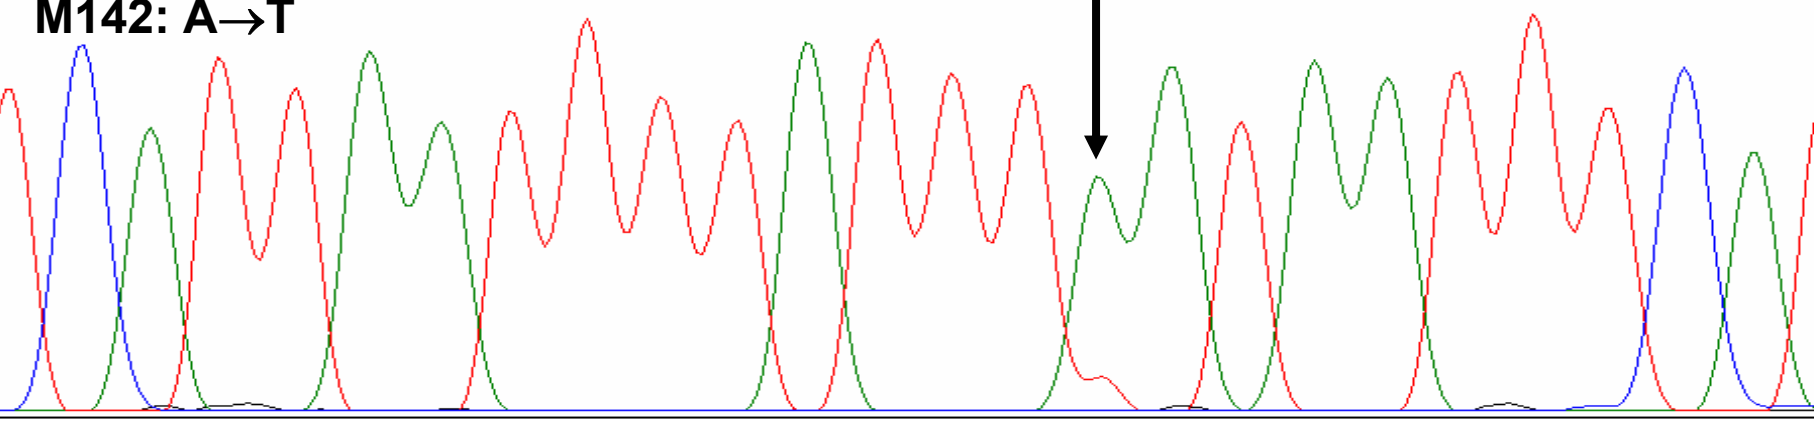

Found in two independent PCRs/sequences

Position: 4,321

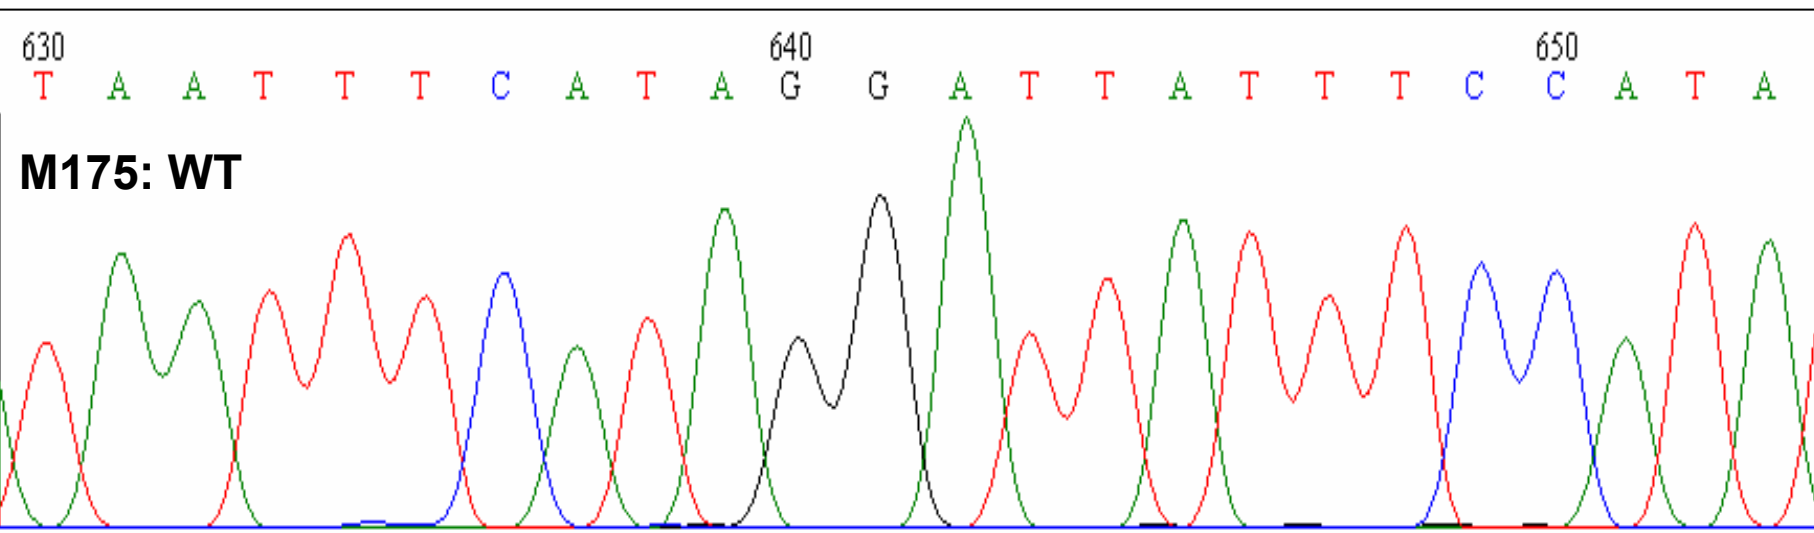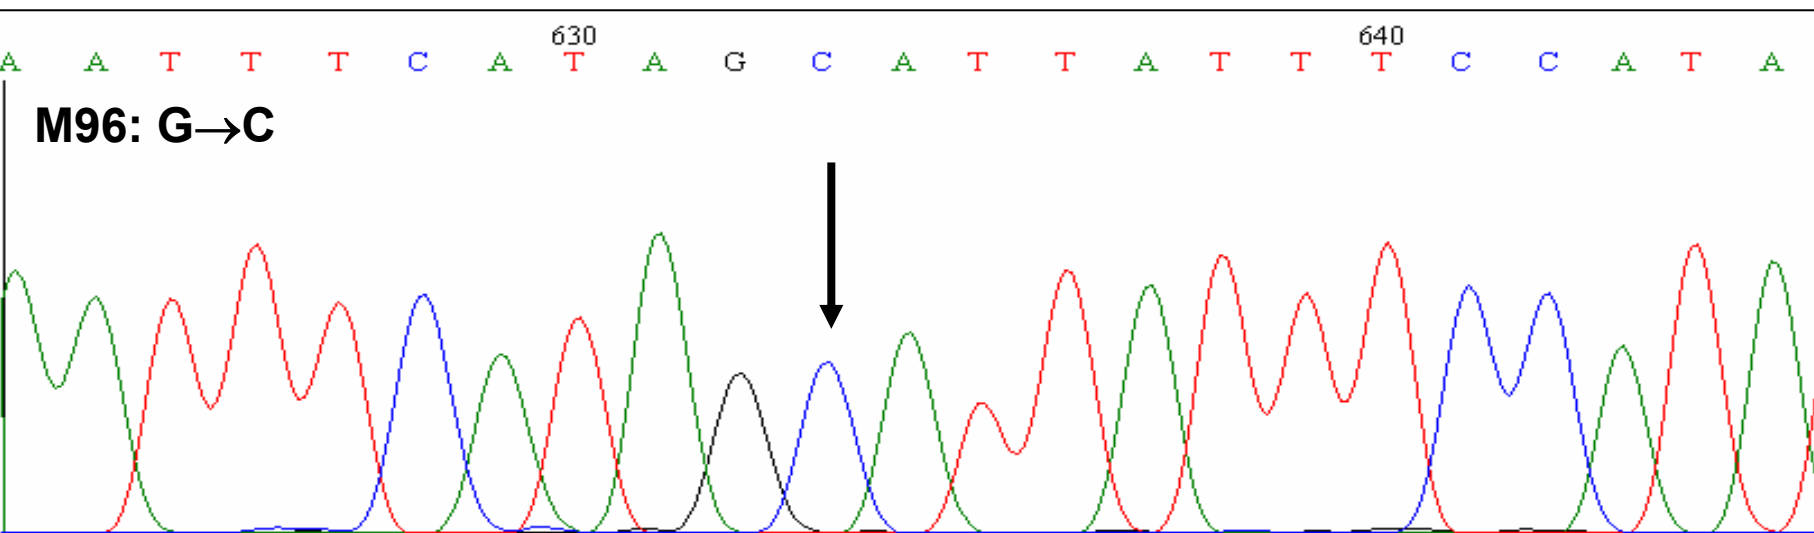

Position: 4,459

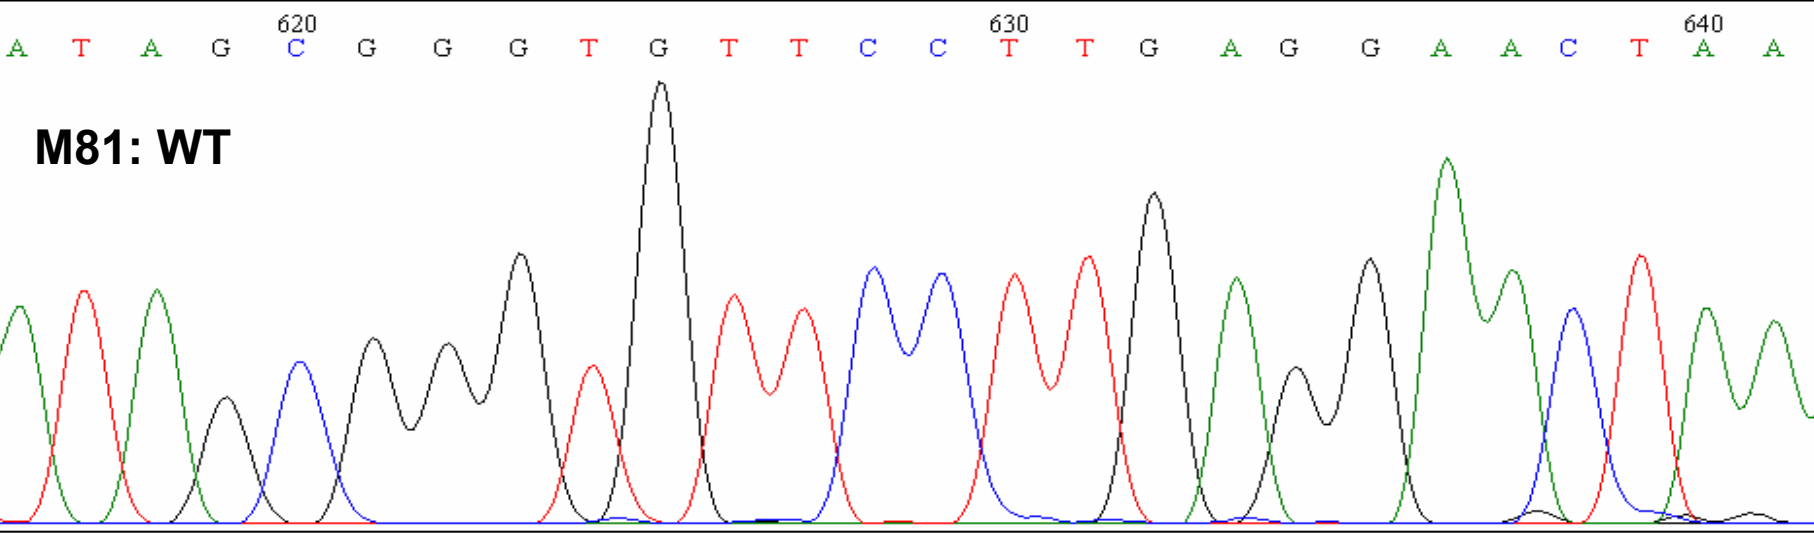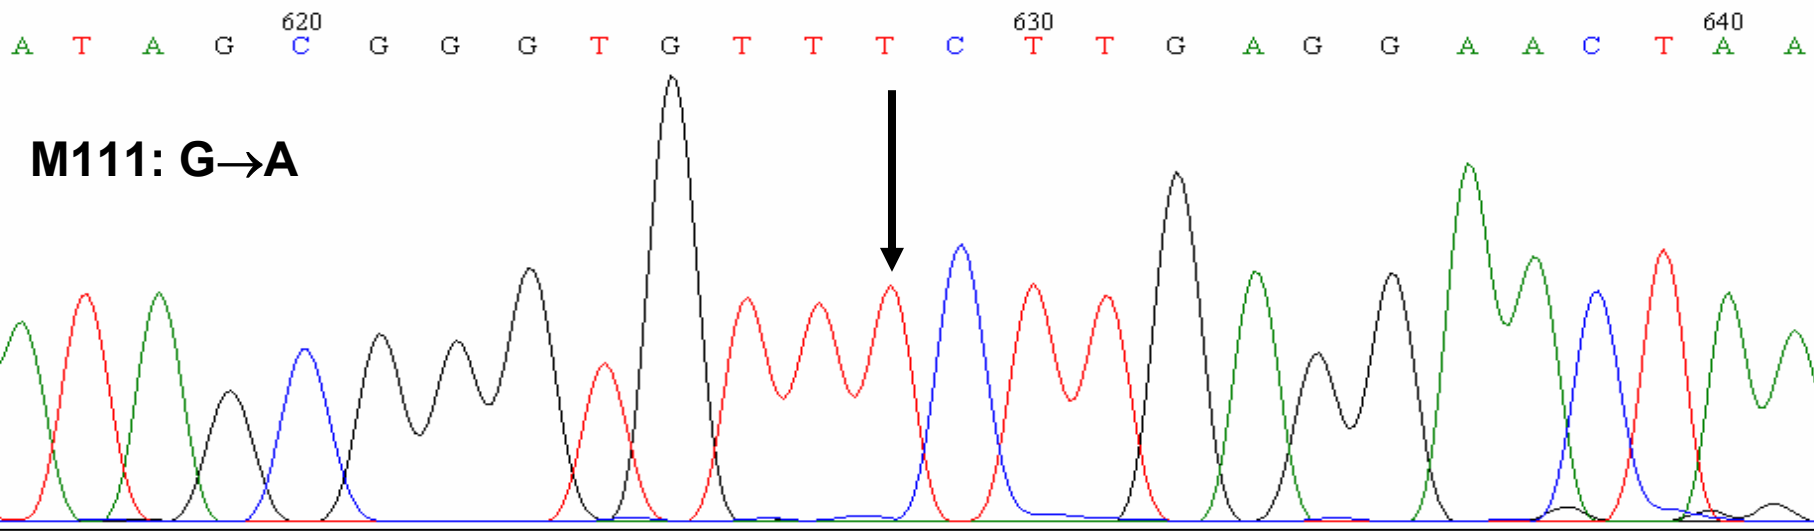

Mutation visible only on reverse sequence

Position: 4,533

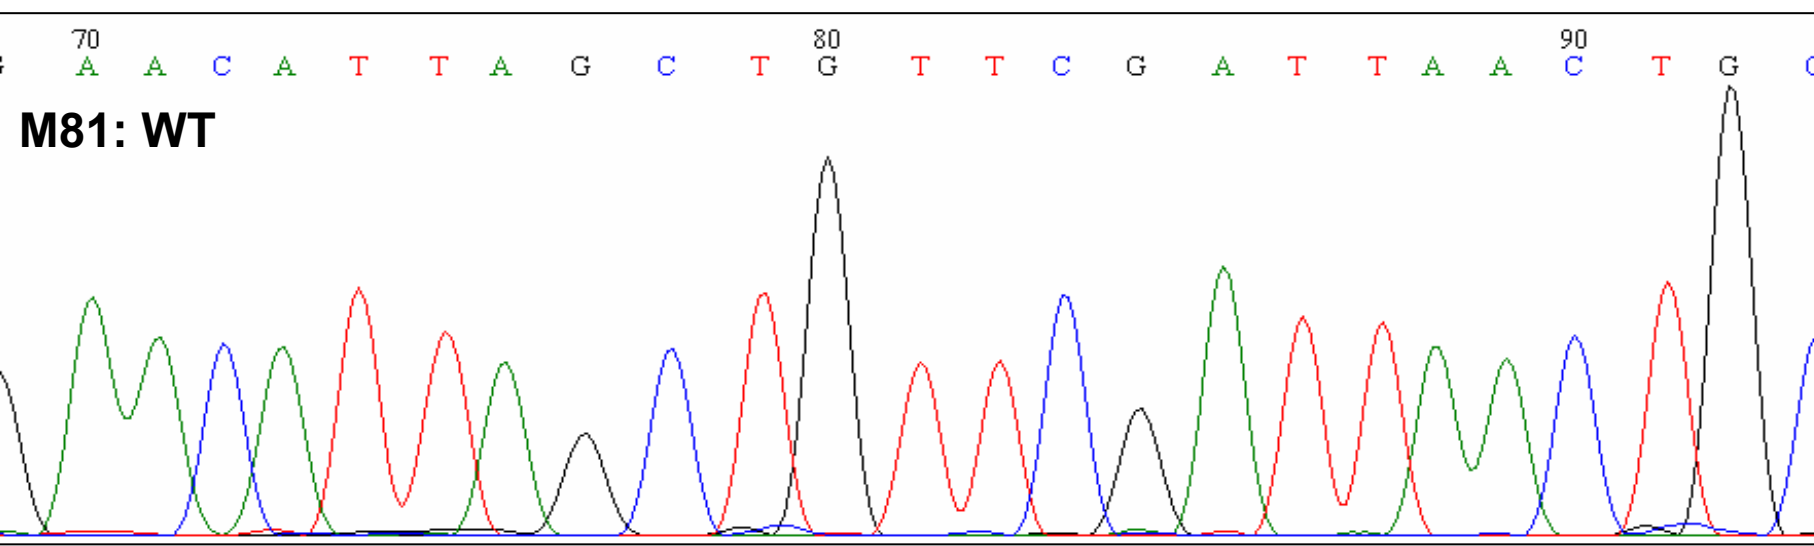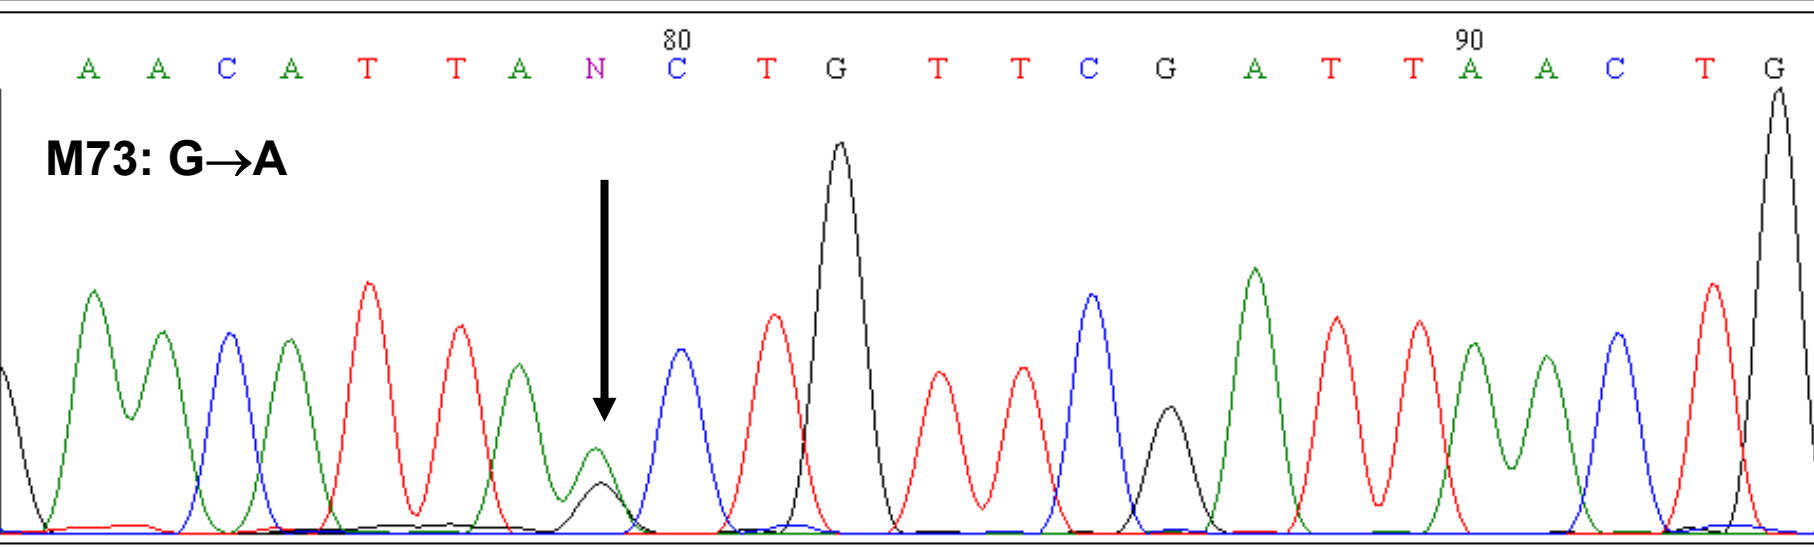

Position: 4,588

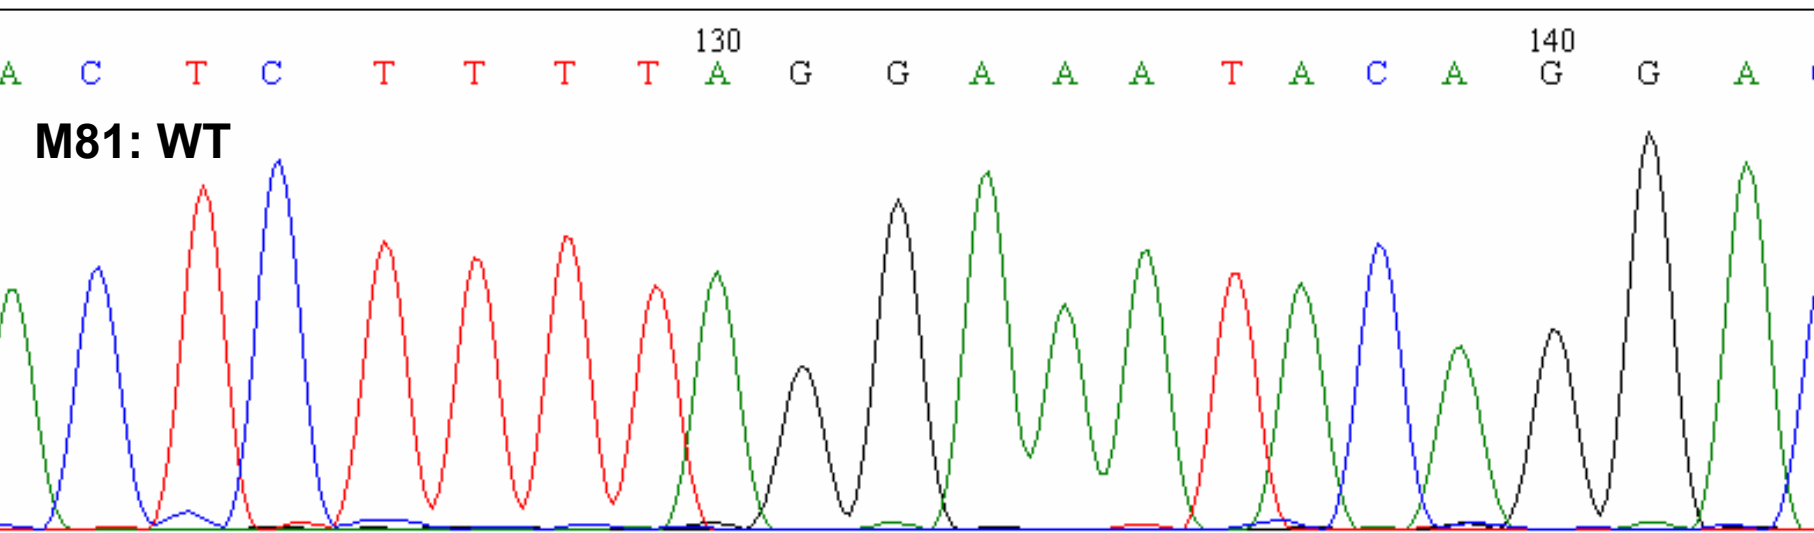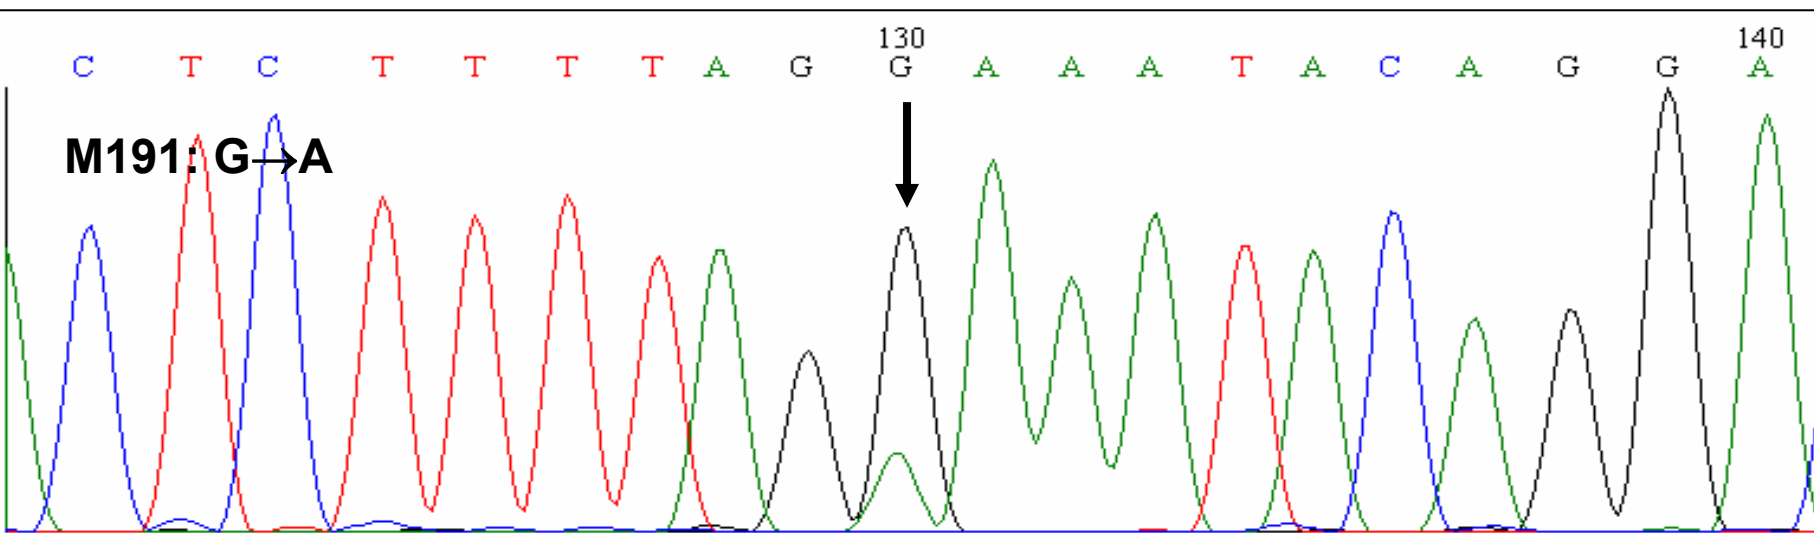

Position: 4,708

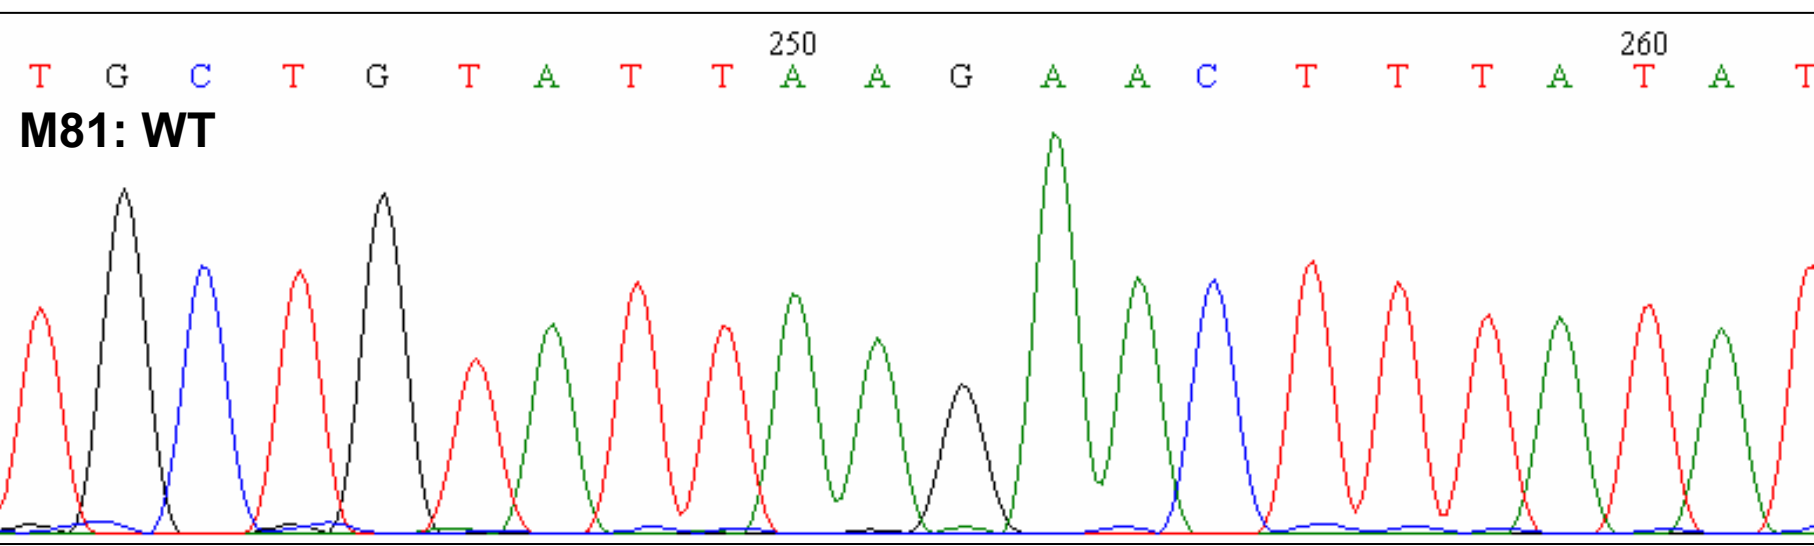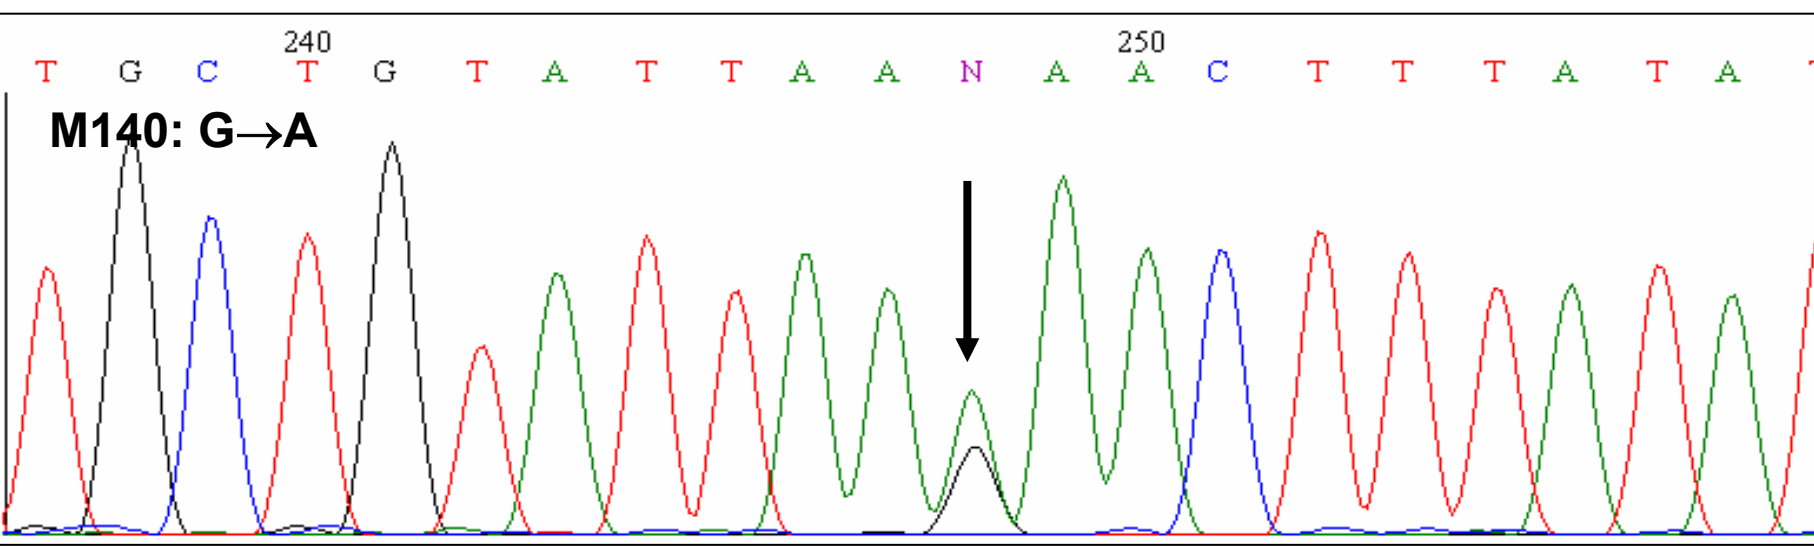

Position: 5,187

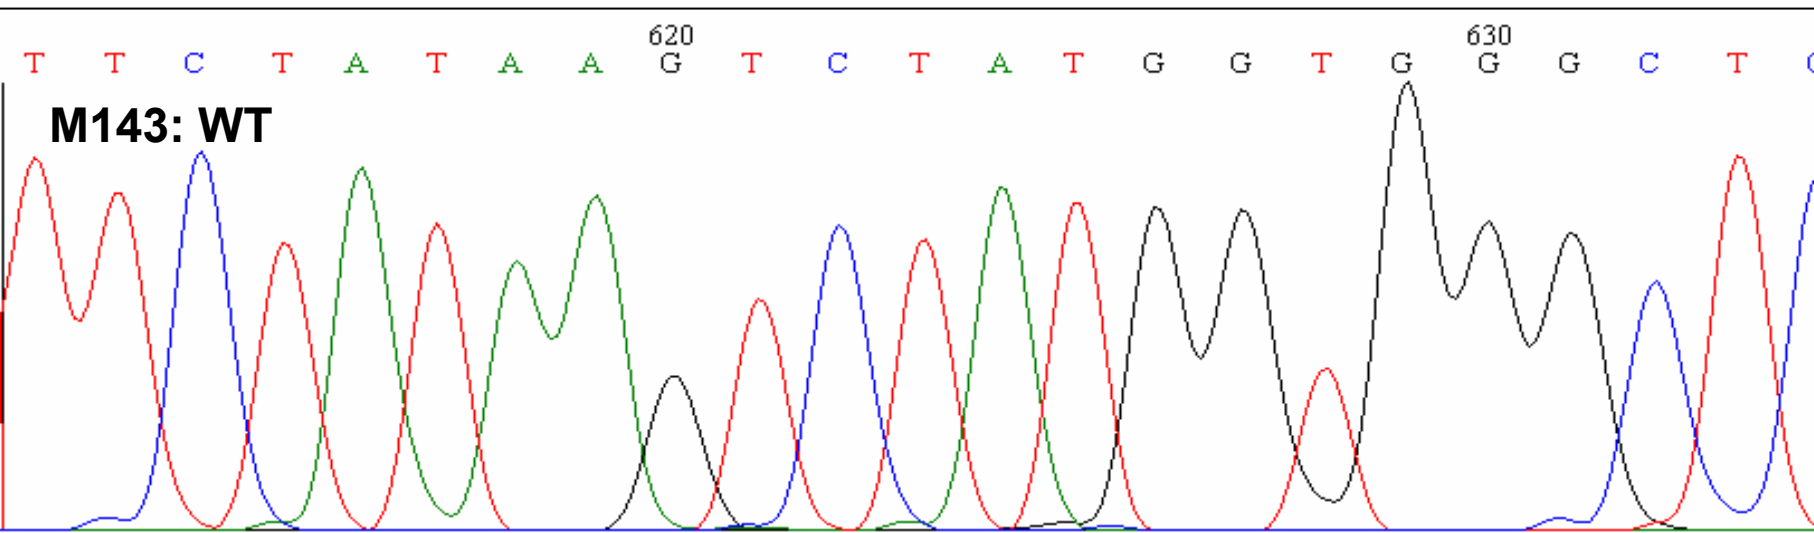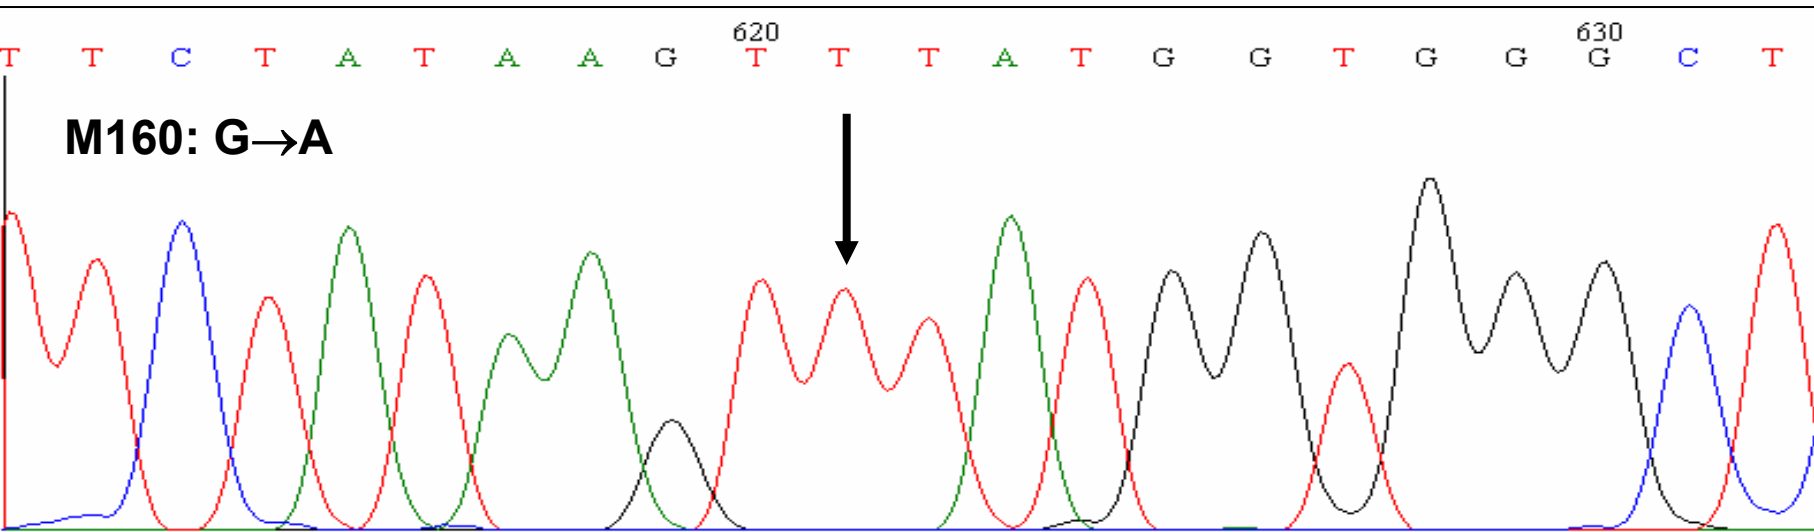

Mutation visible only on reverse sequence

Position: 5,970

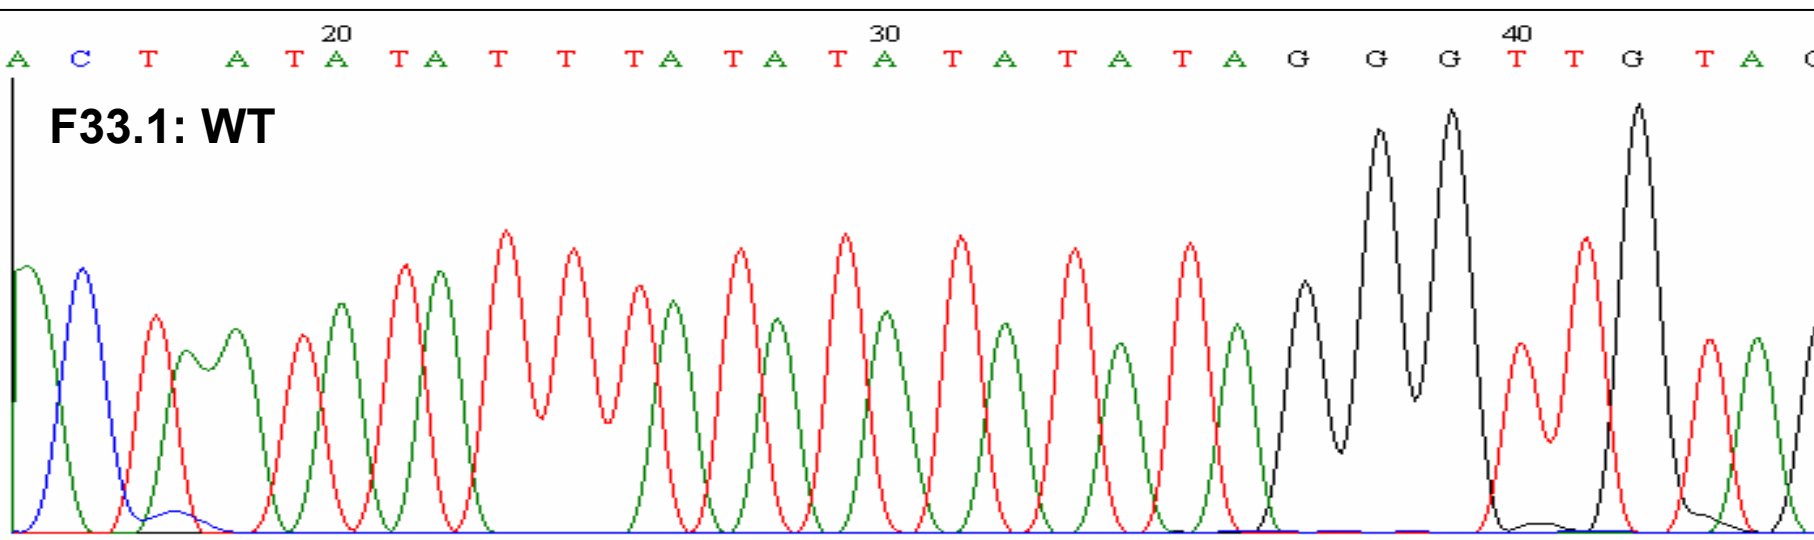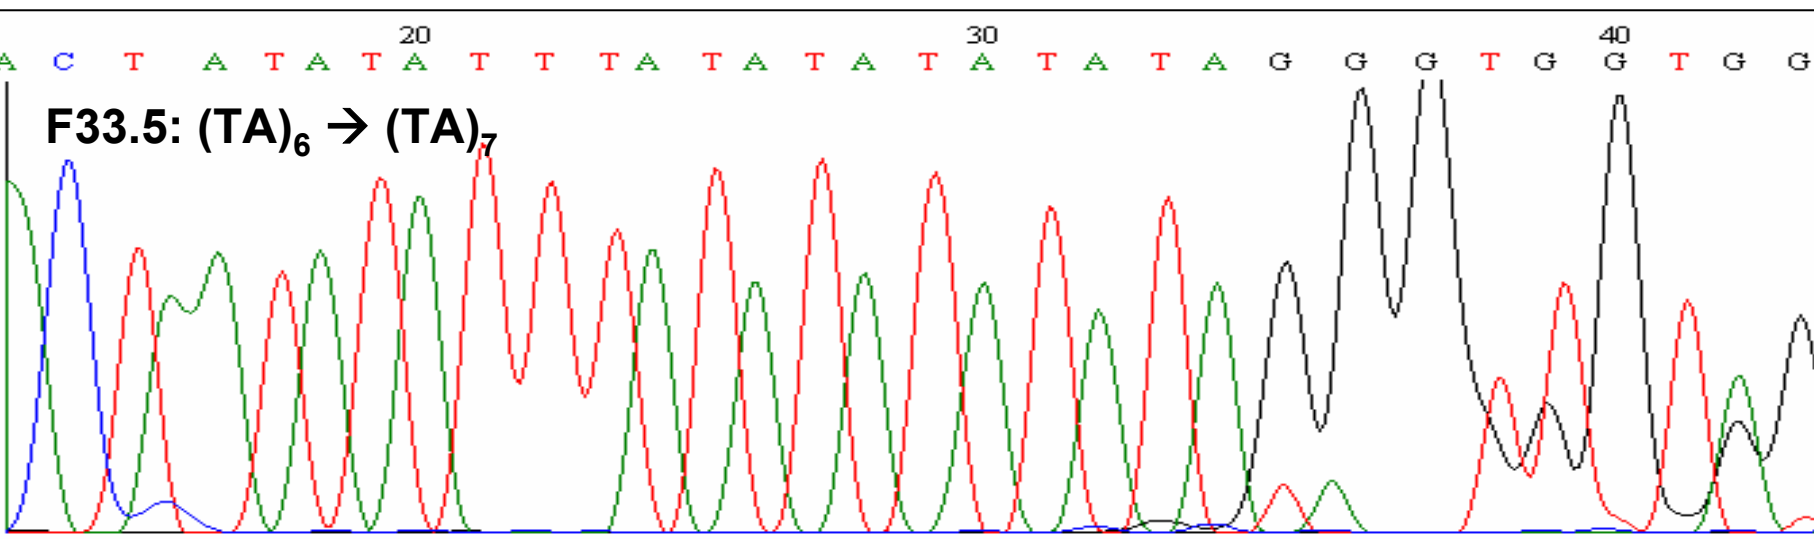



Position: 5,970

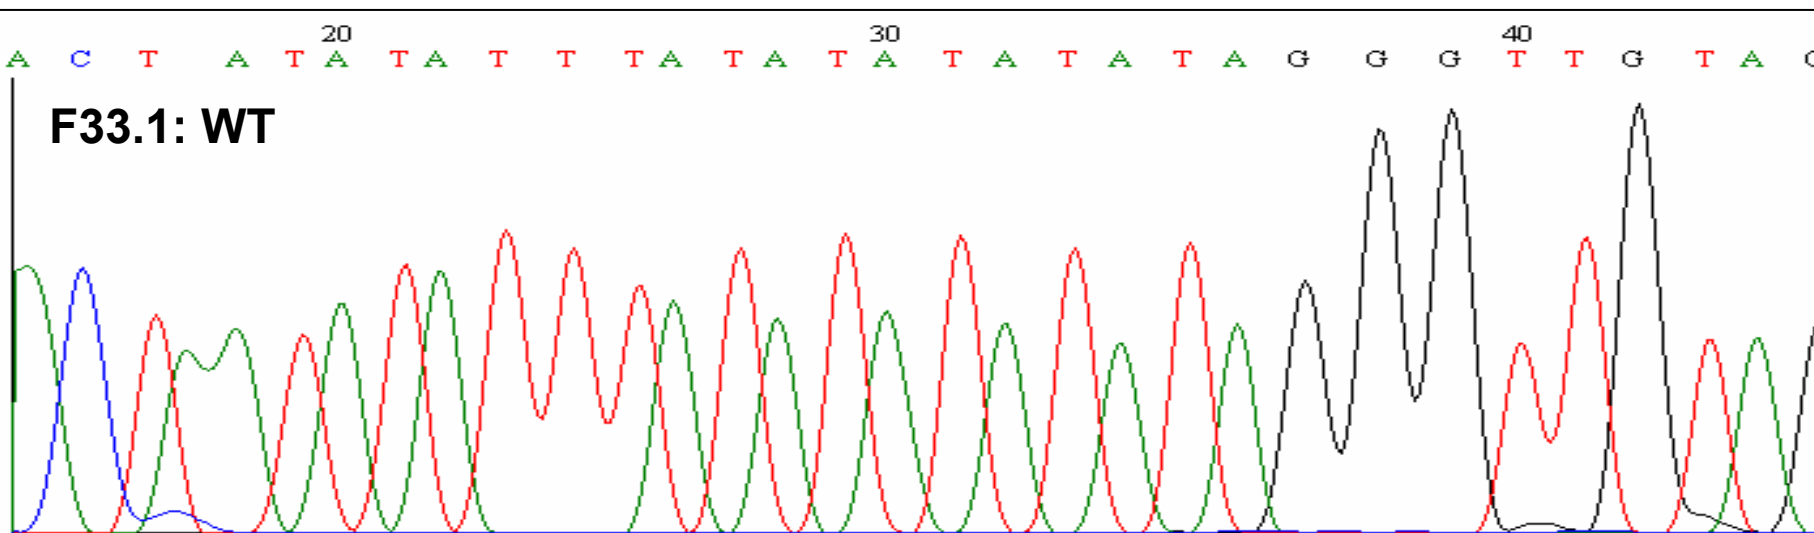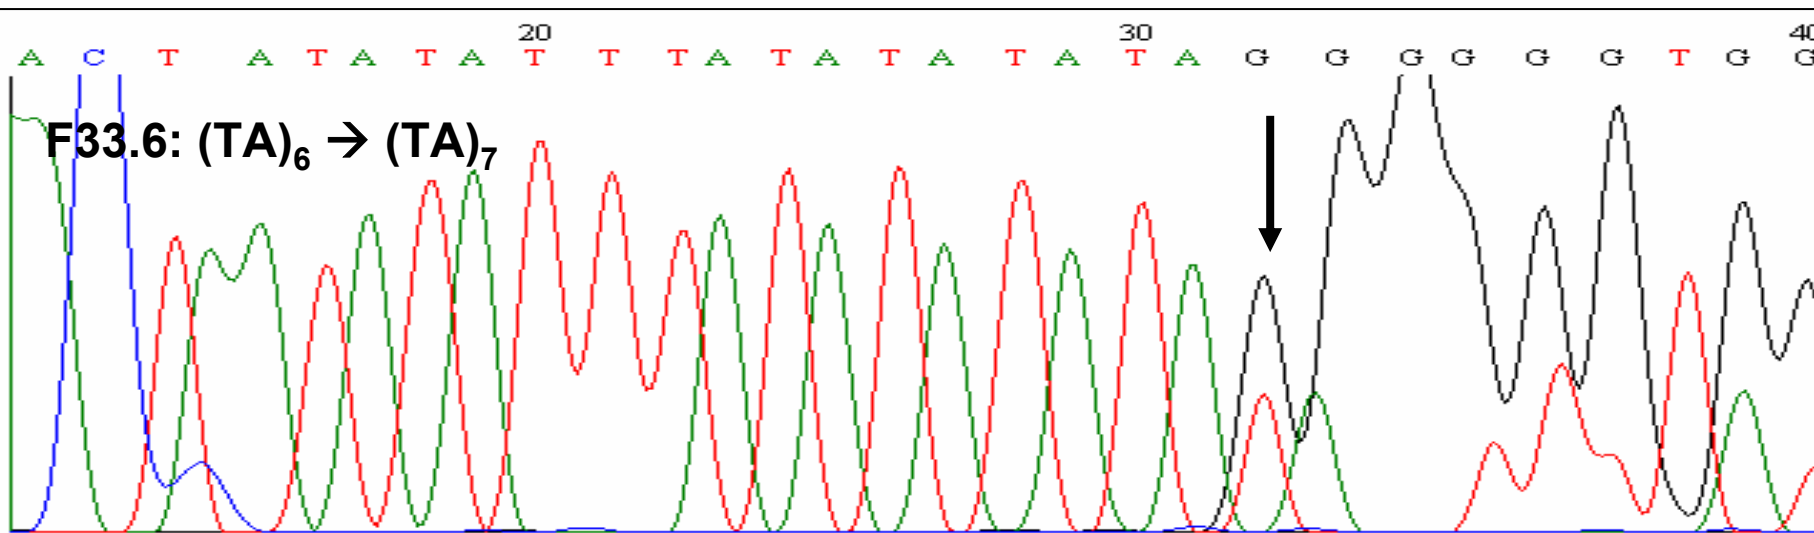

Position: 5,970

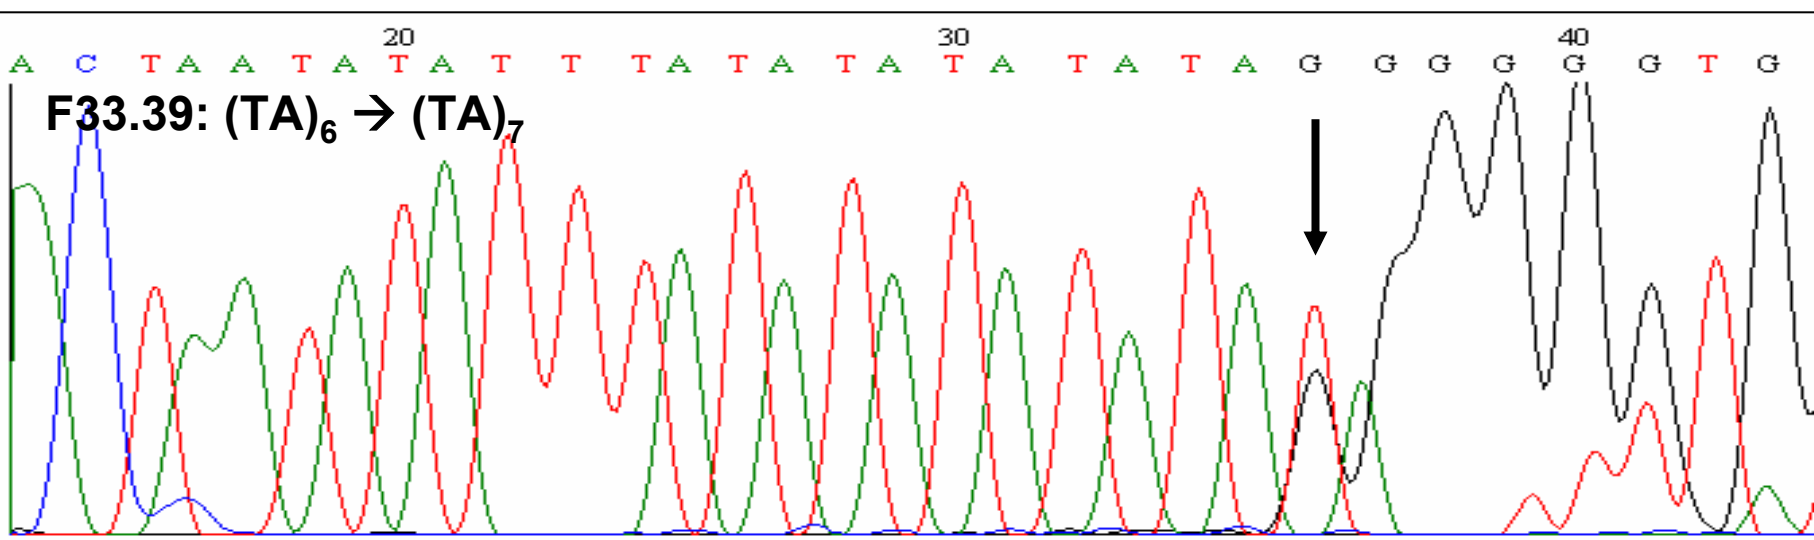

Position: 5,970

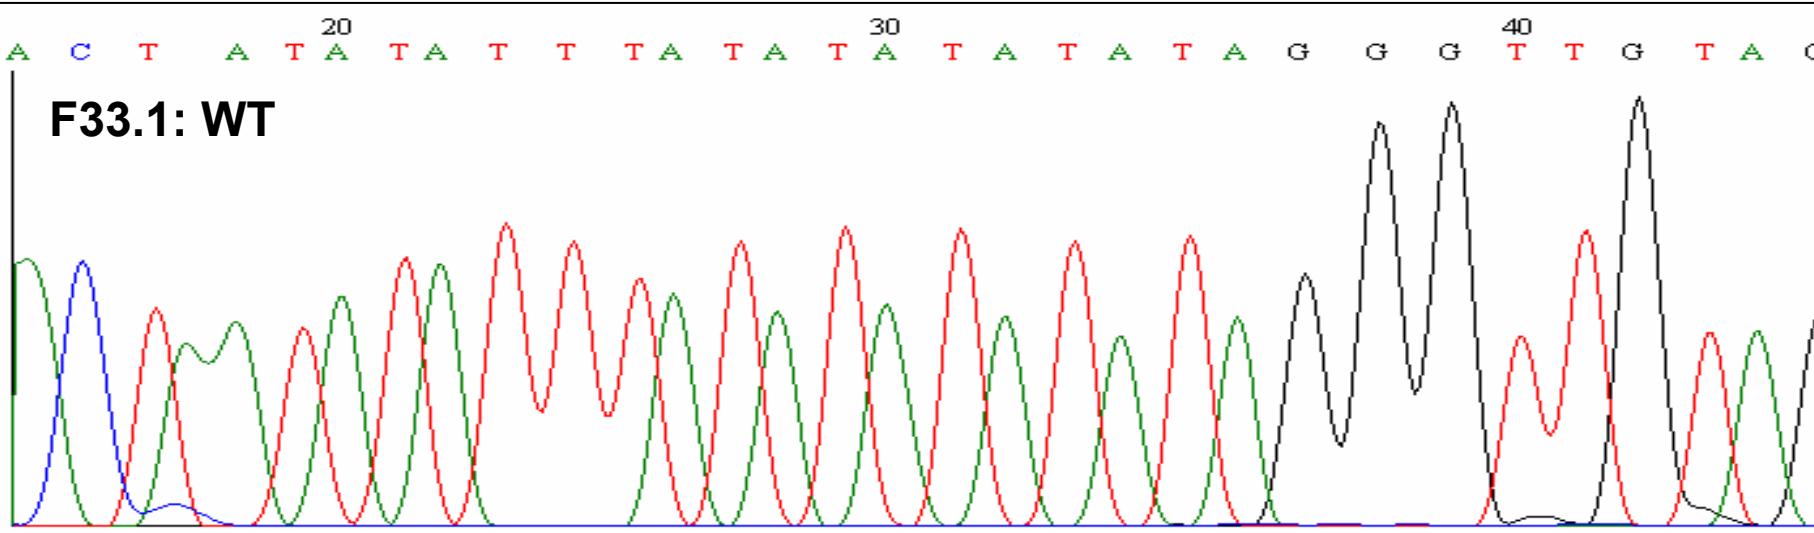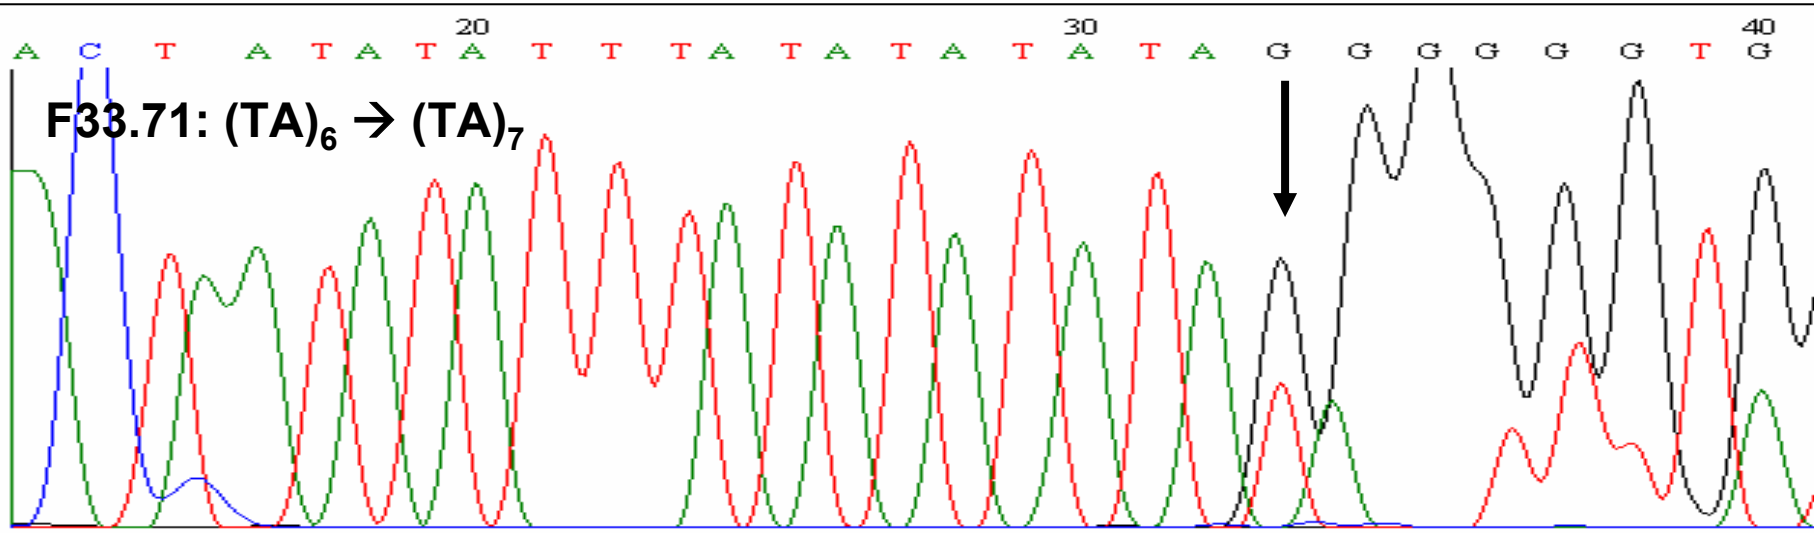

Position: 5,970

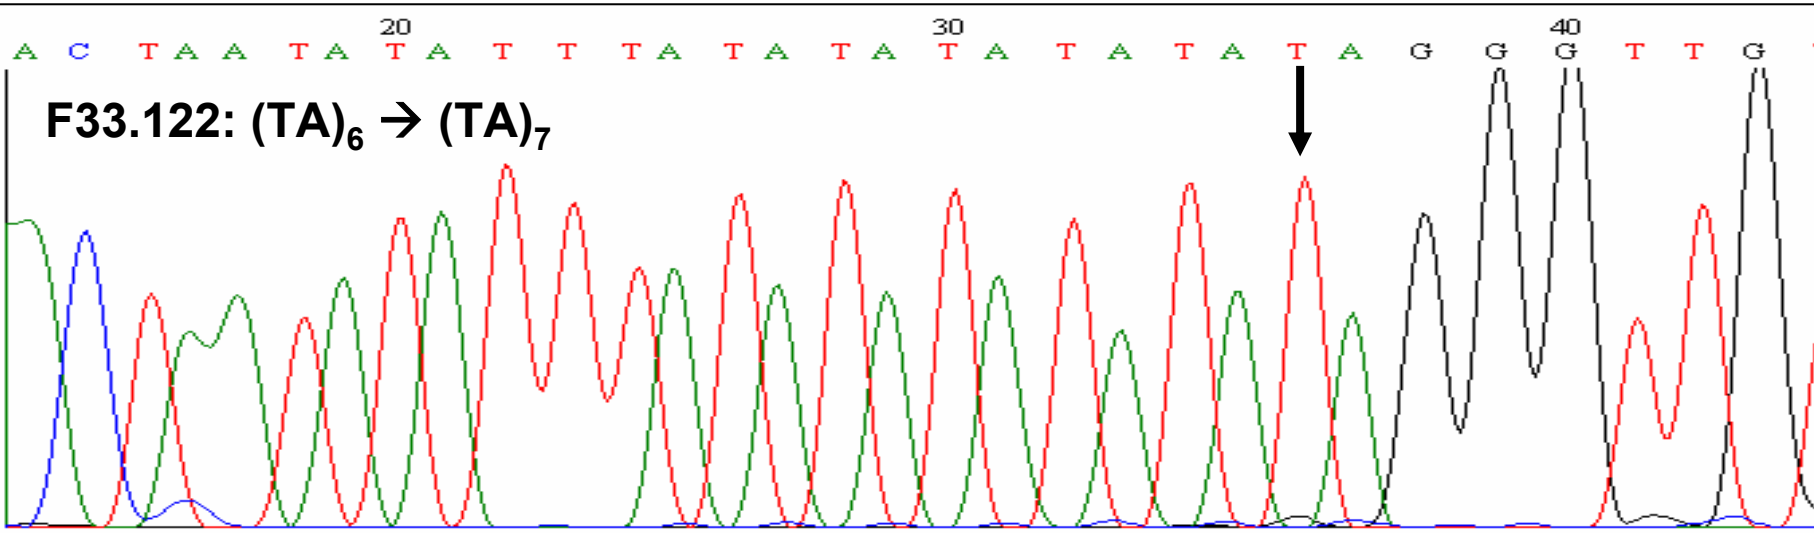

Position: 7,125

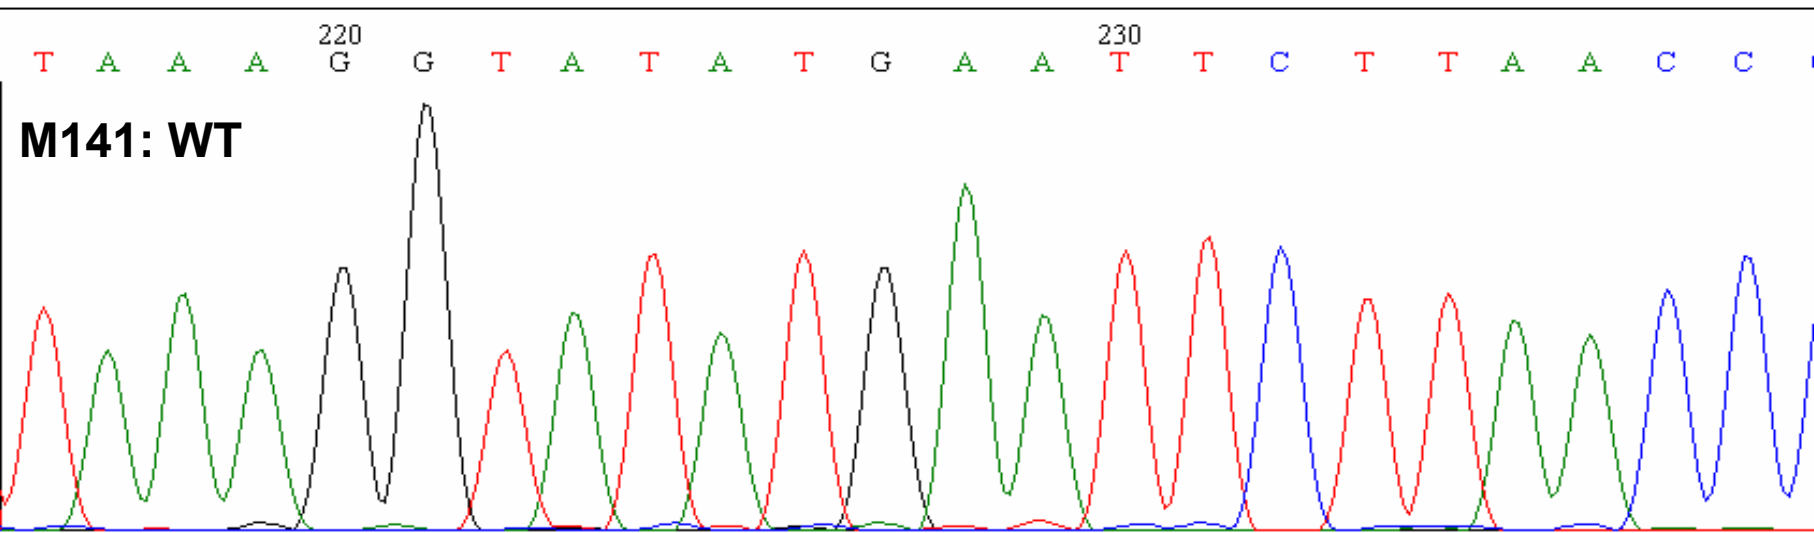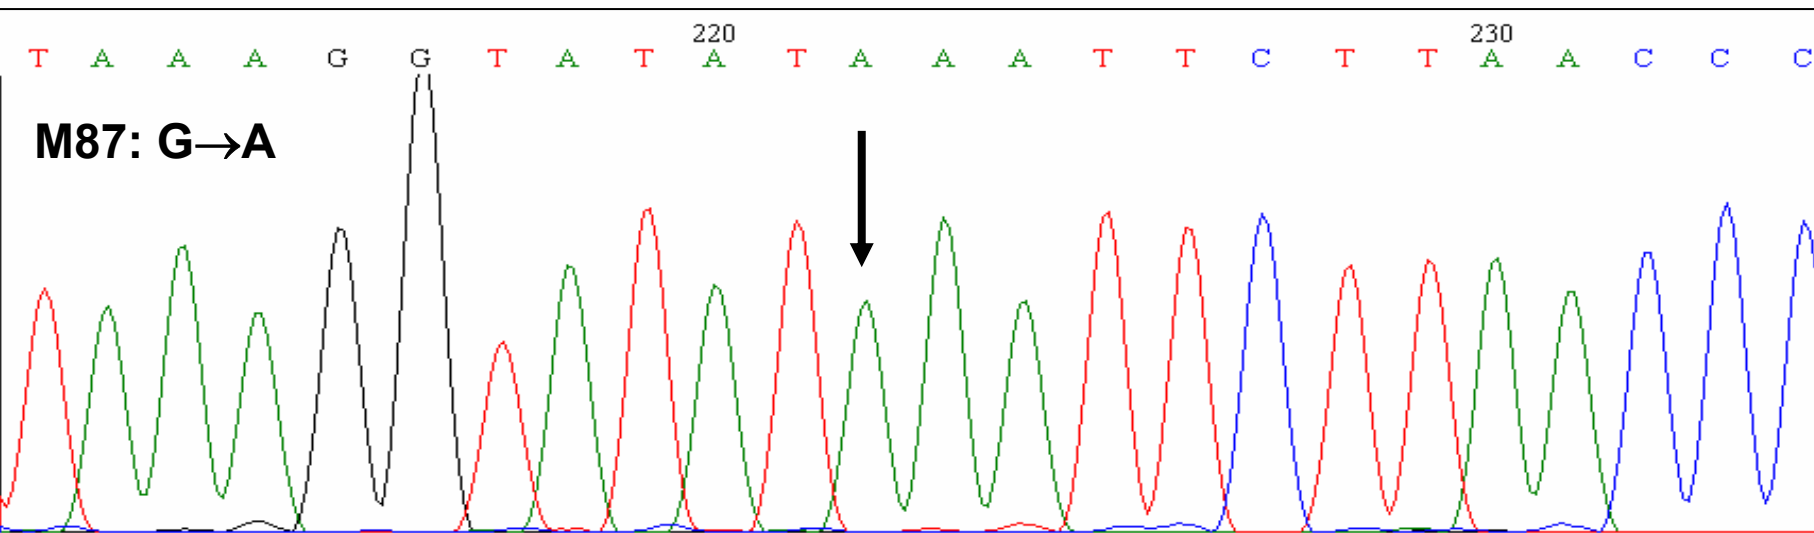

Position: 7,382

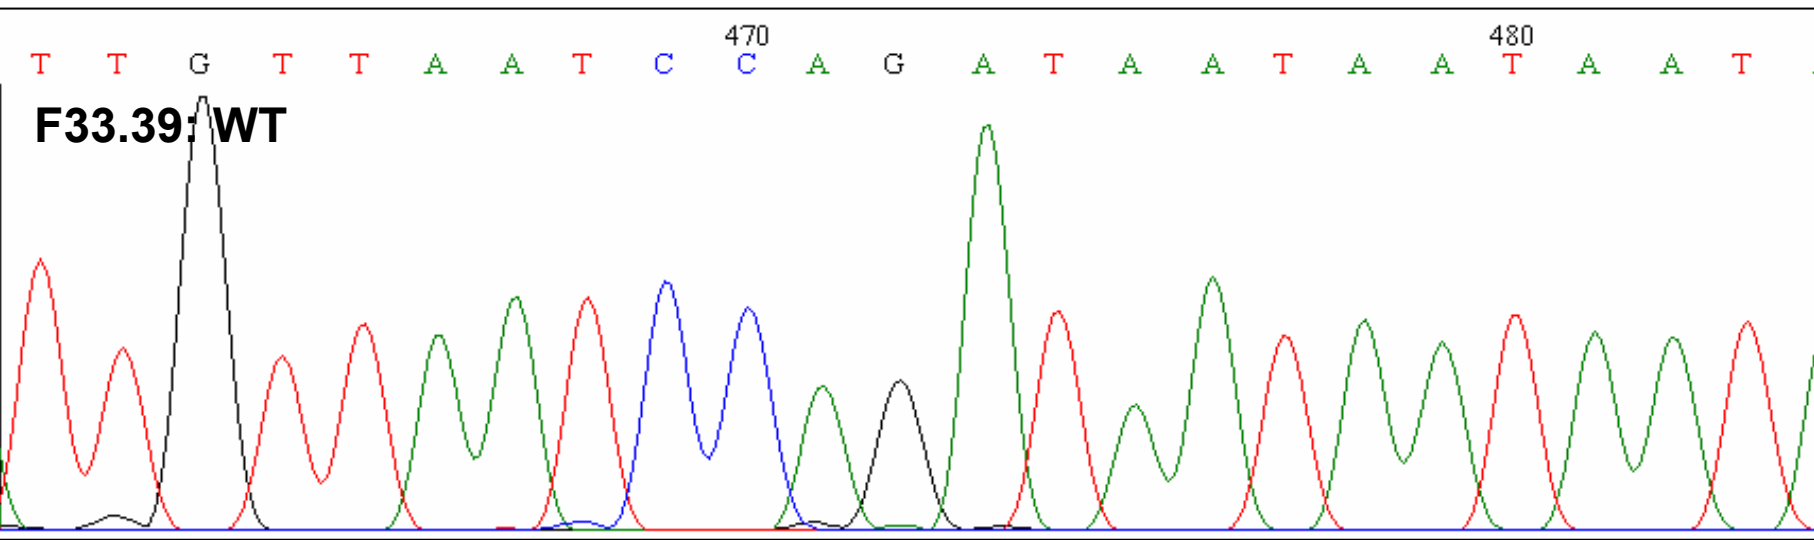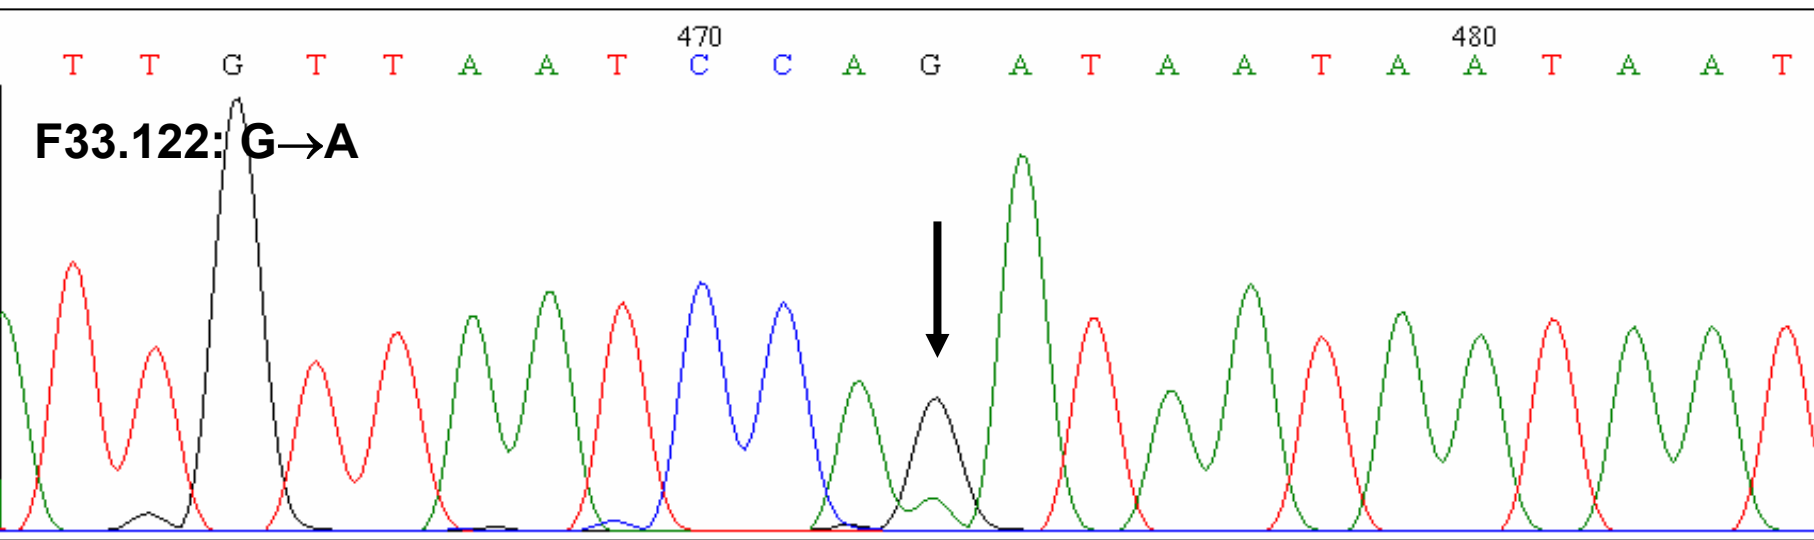

Position: 7,415

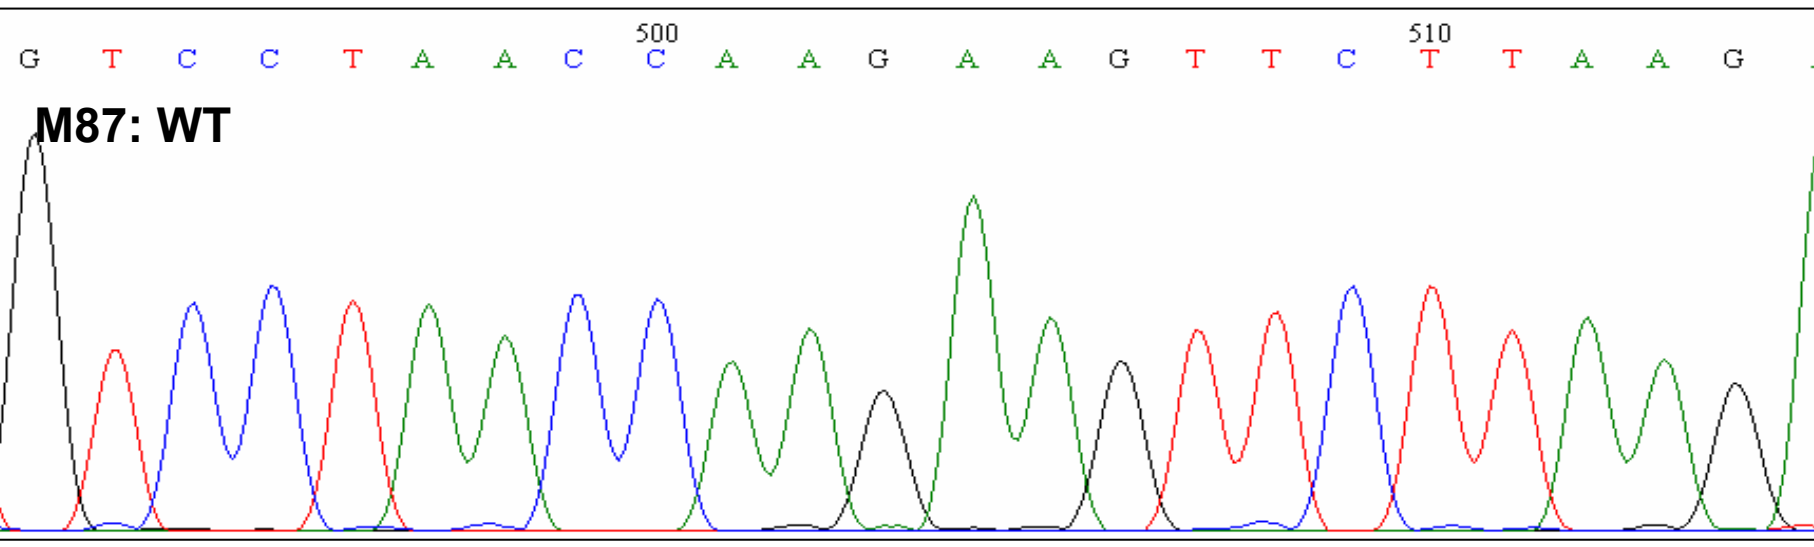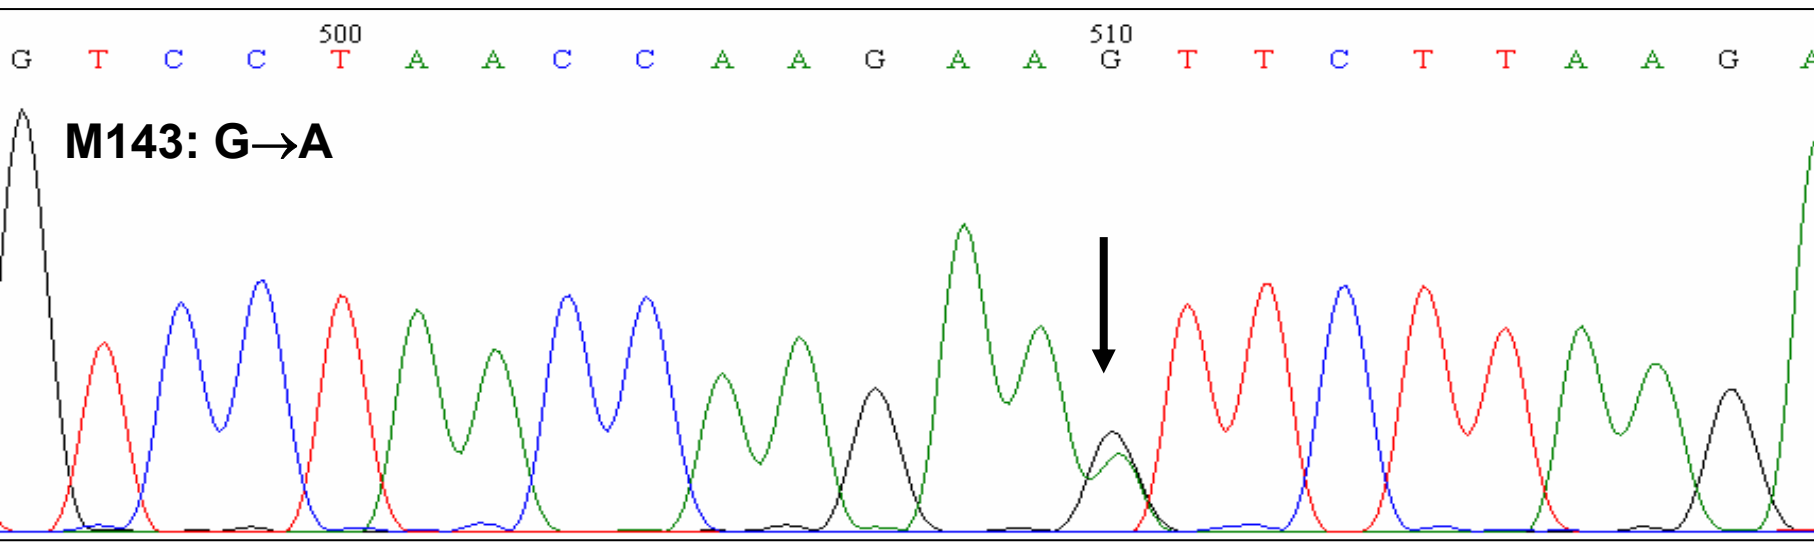

Position: 8,093

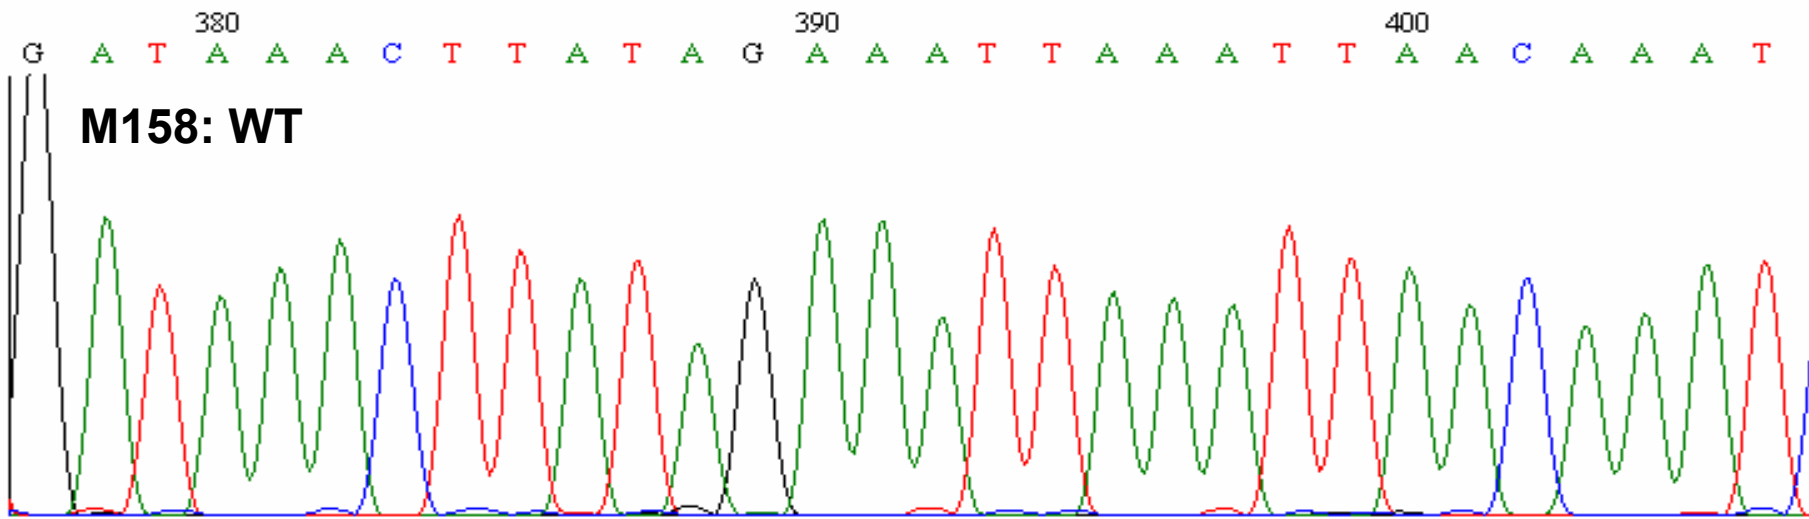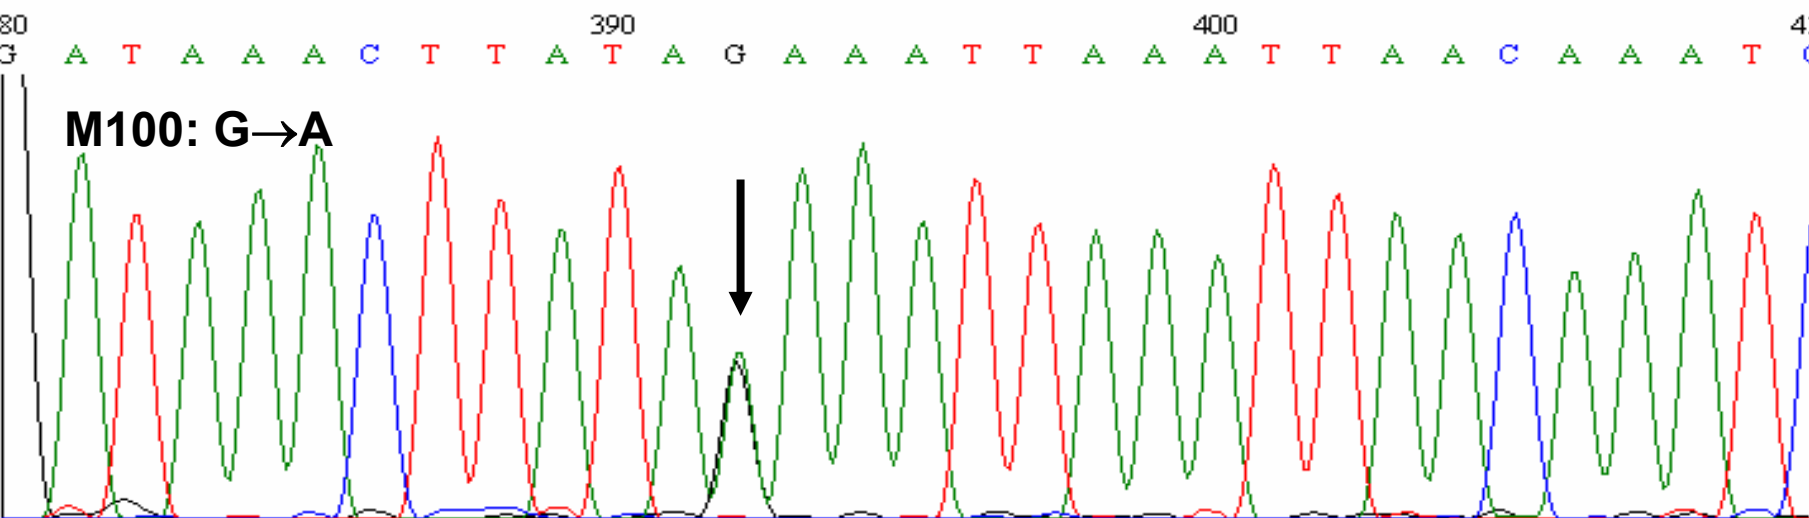



Position: 8,192

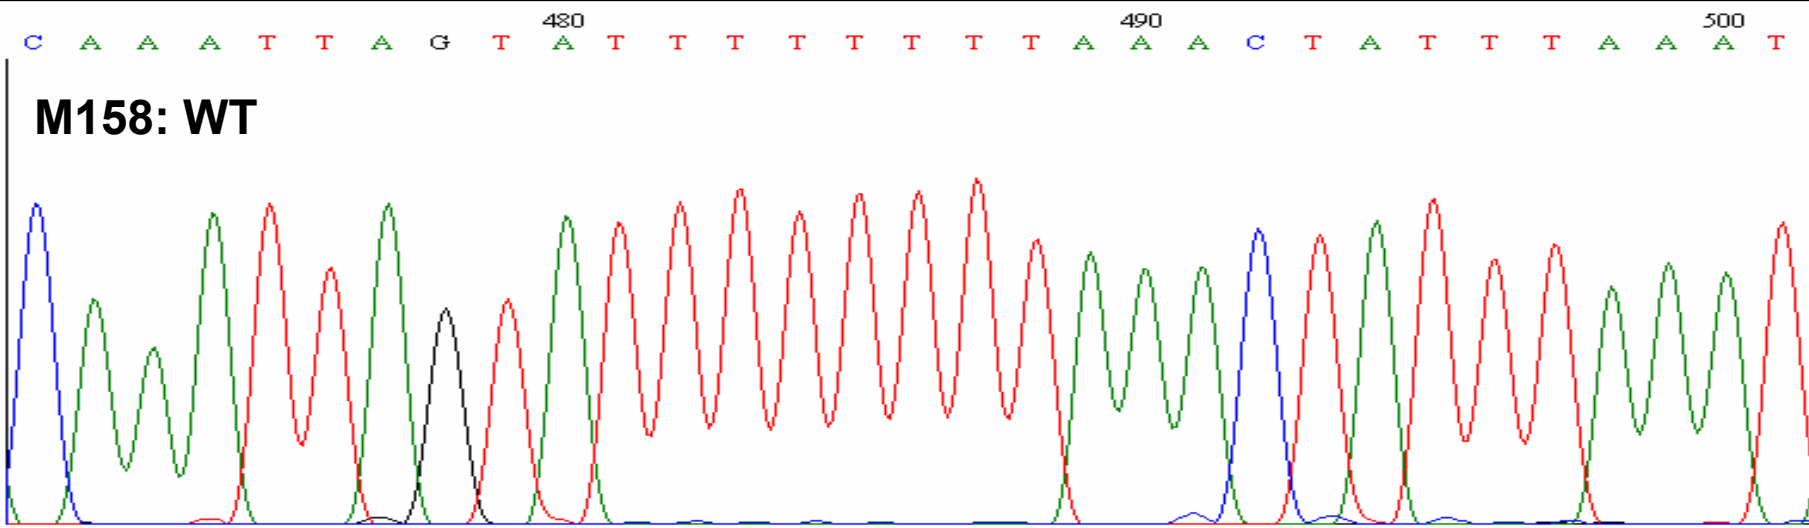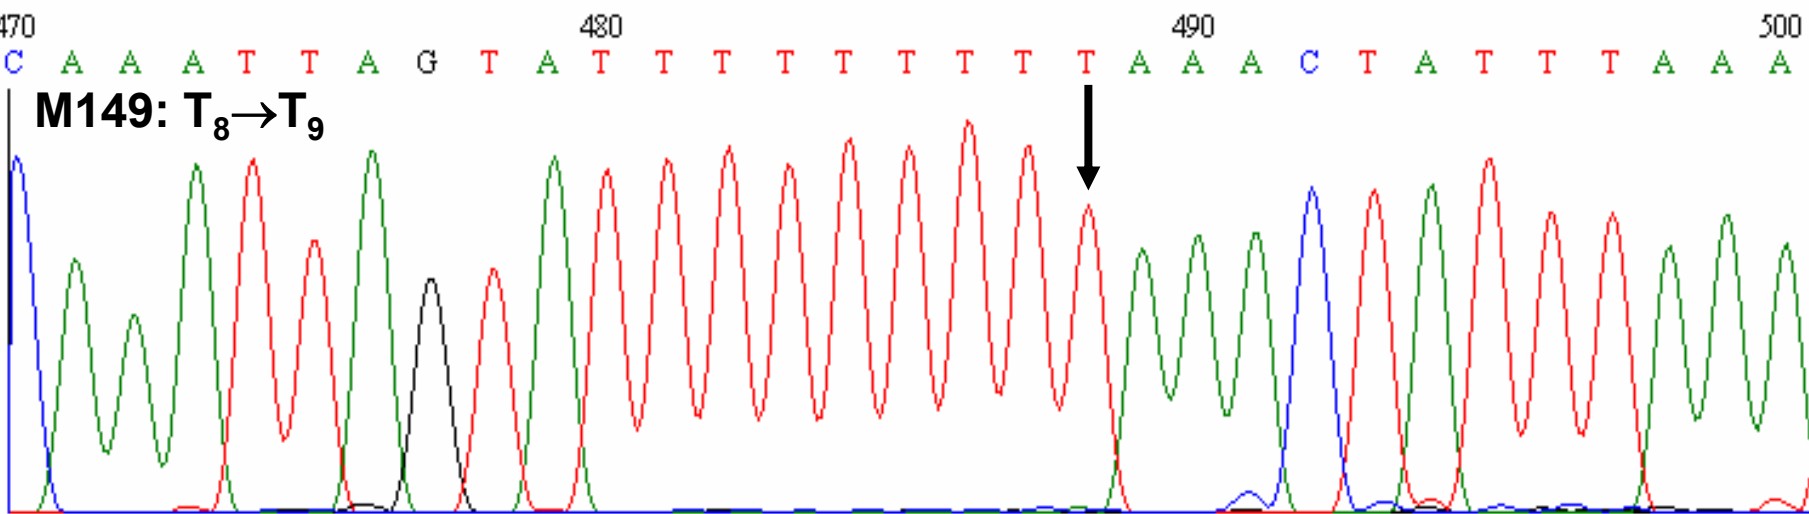

Position: 8,192

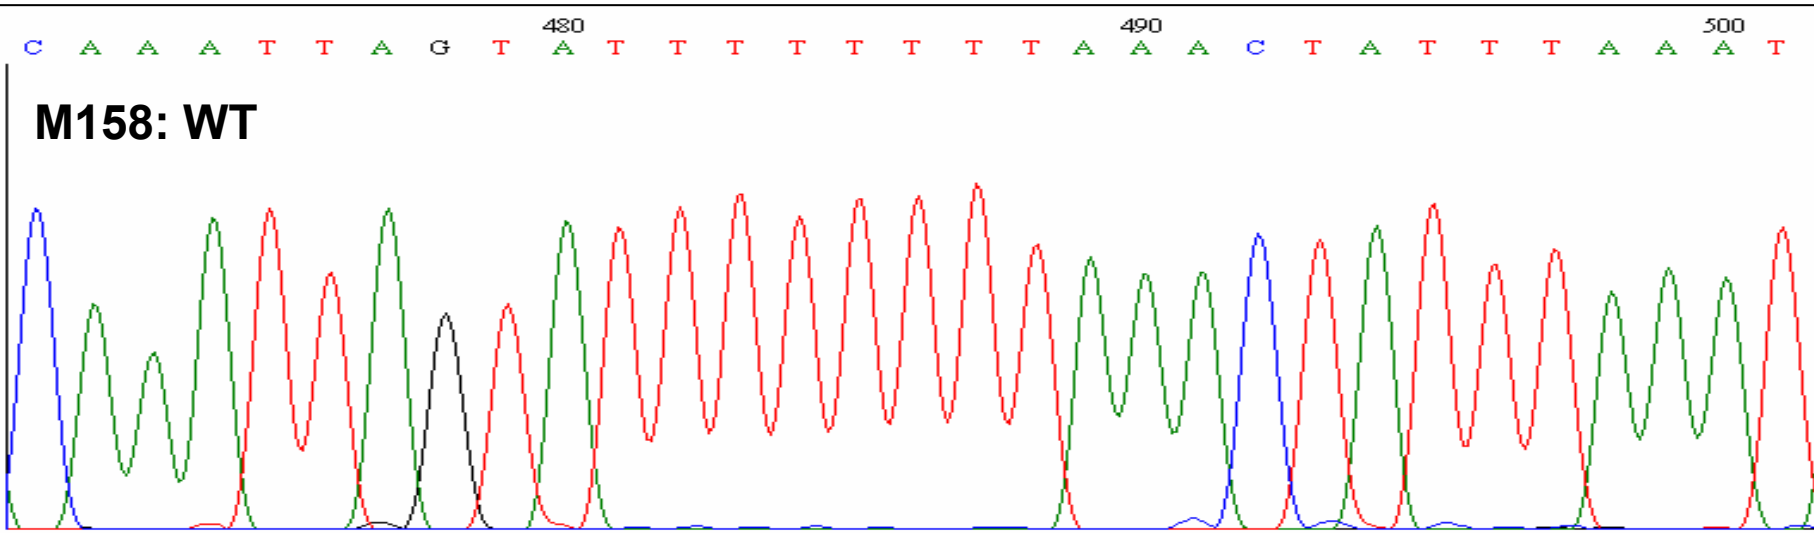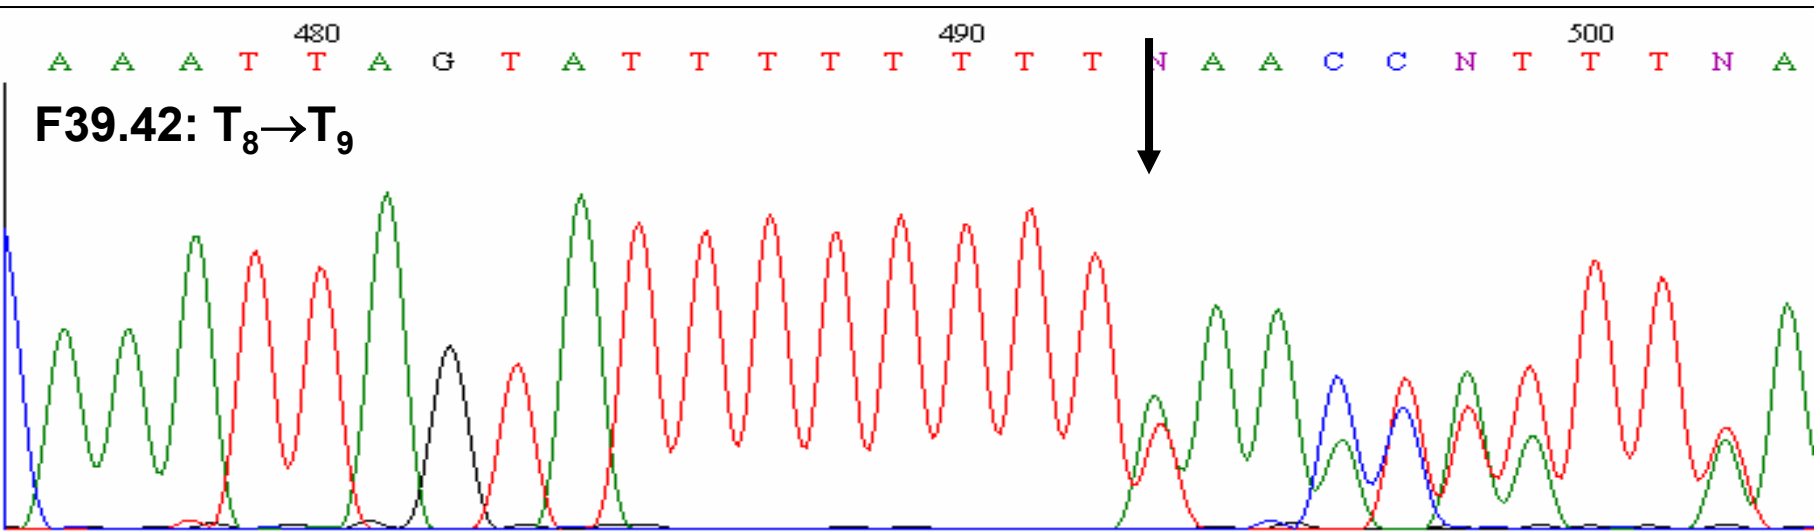

Position: 9,185

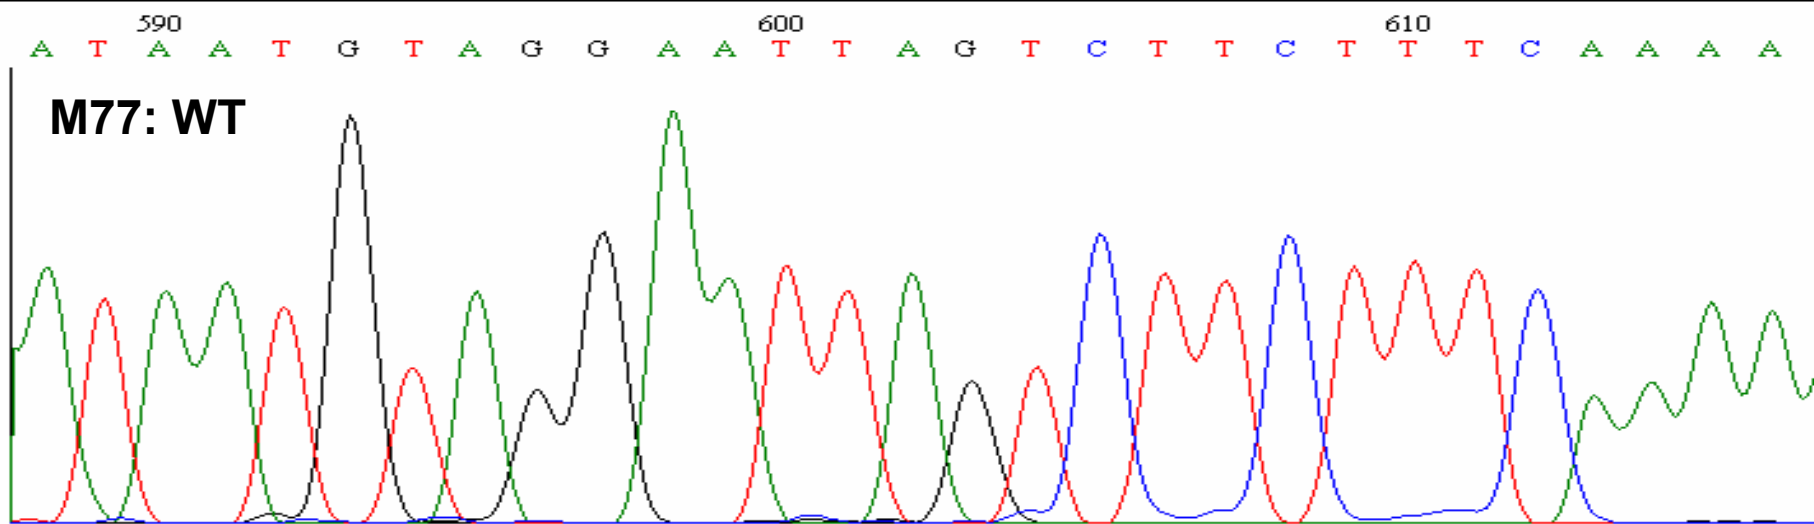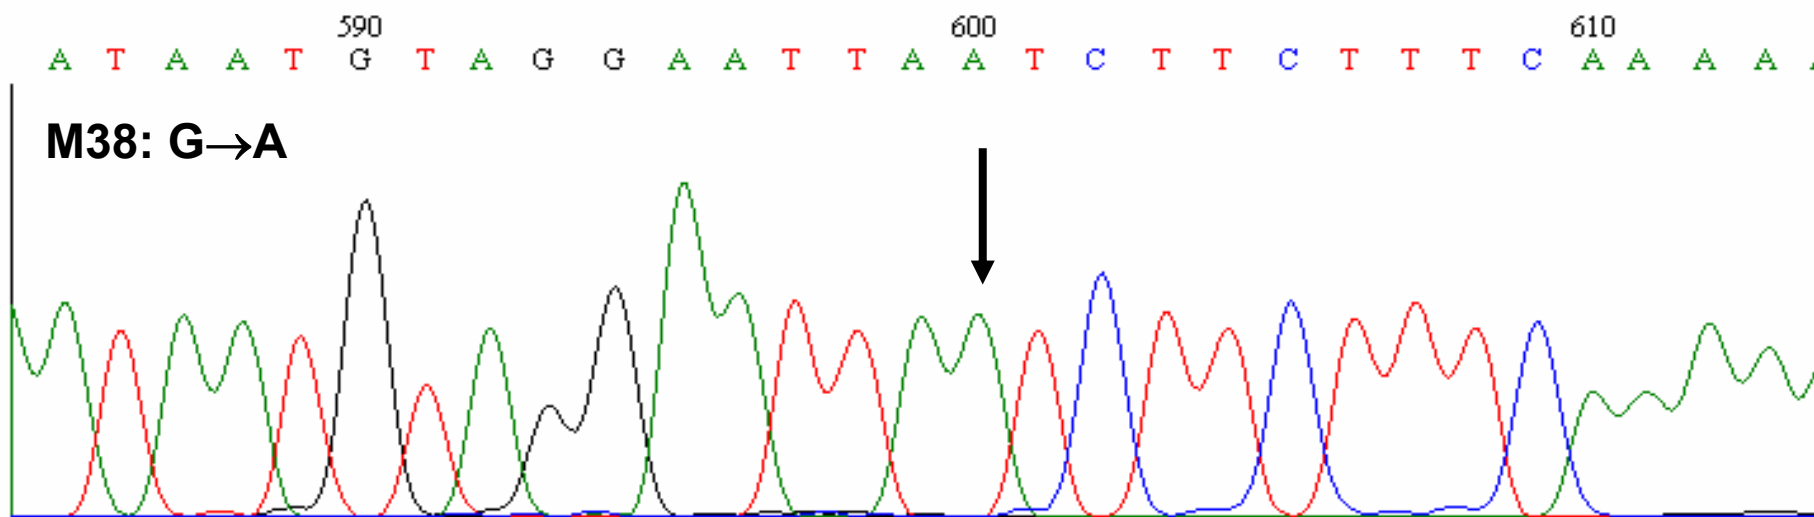

Position: 10,094

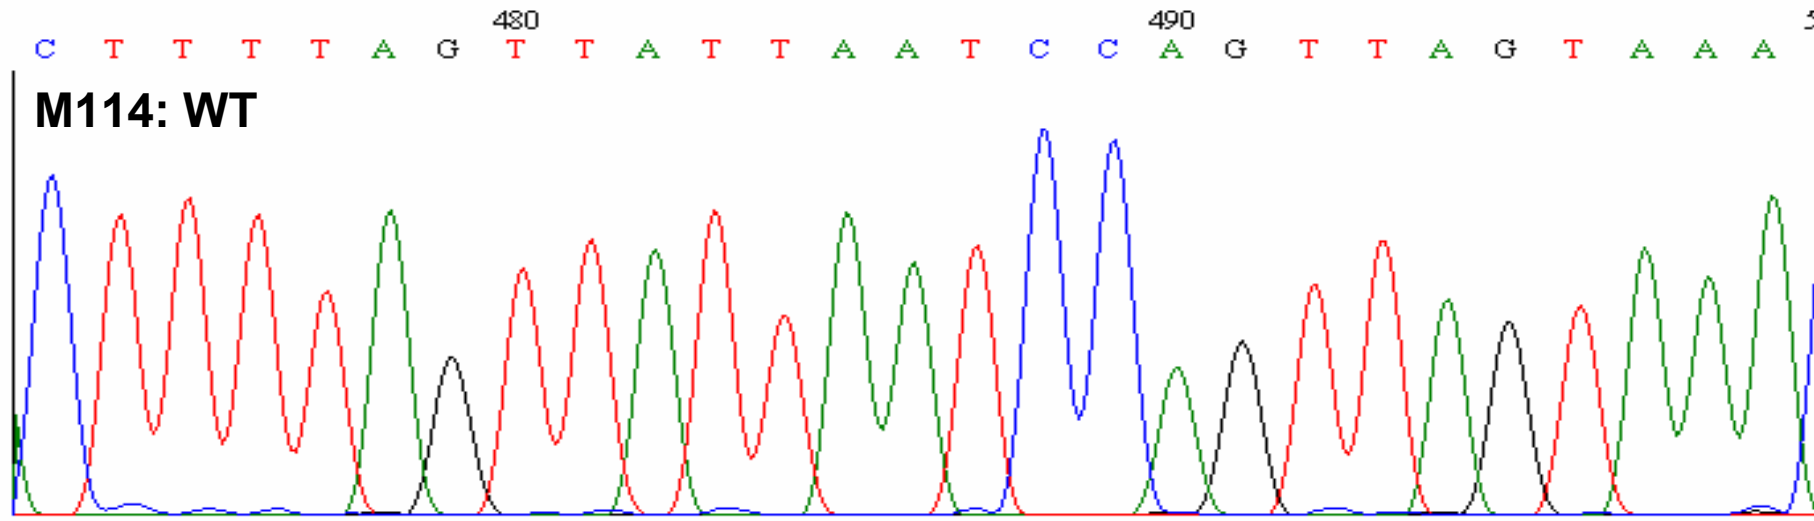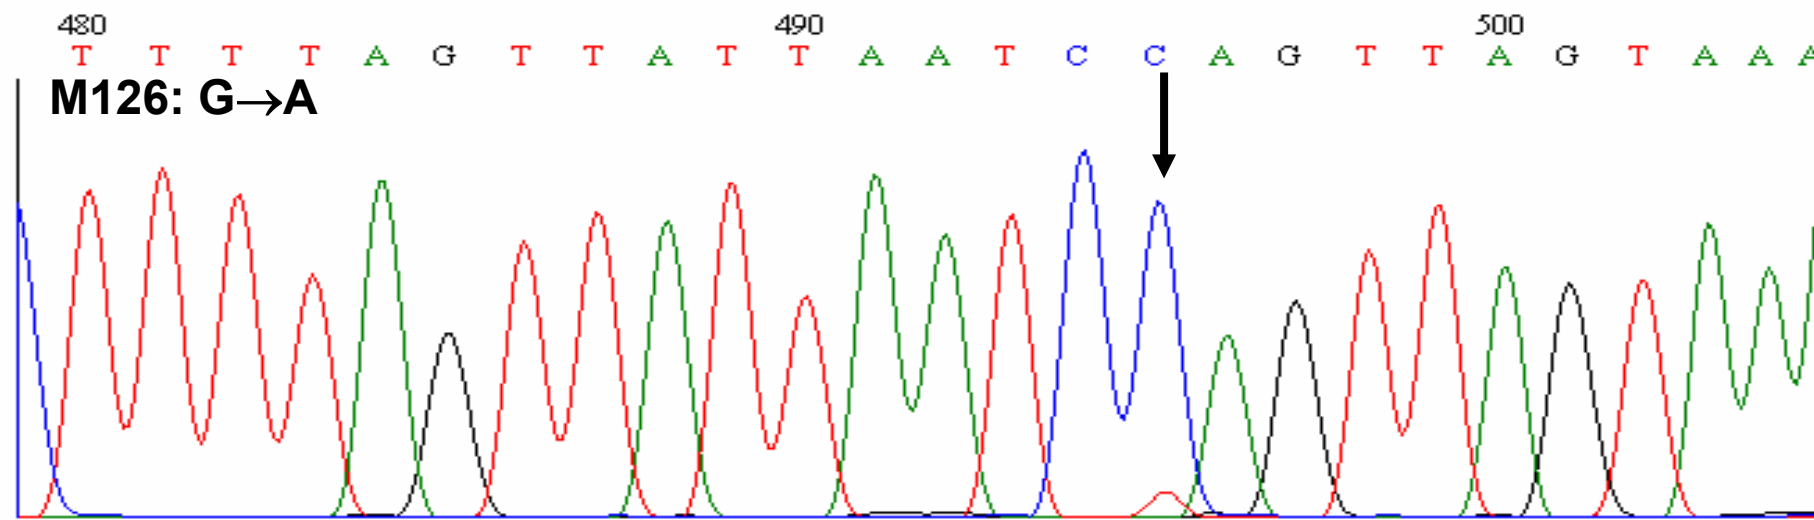

Mutation visible only on reverse sequence & observed in two independent PCRs/sequences

Position: 10,541

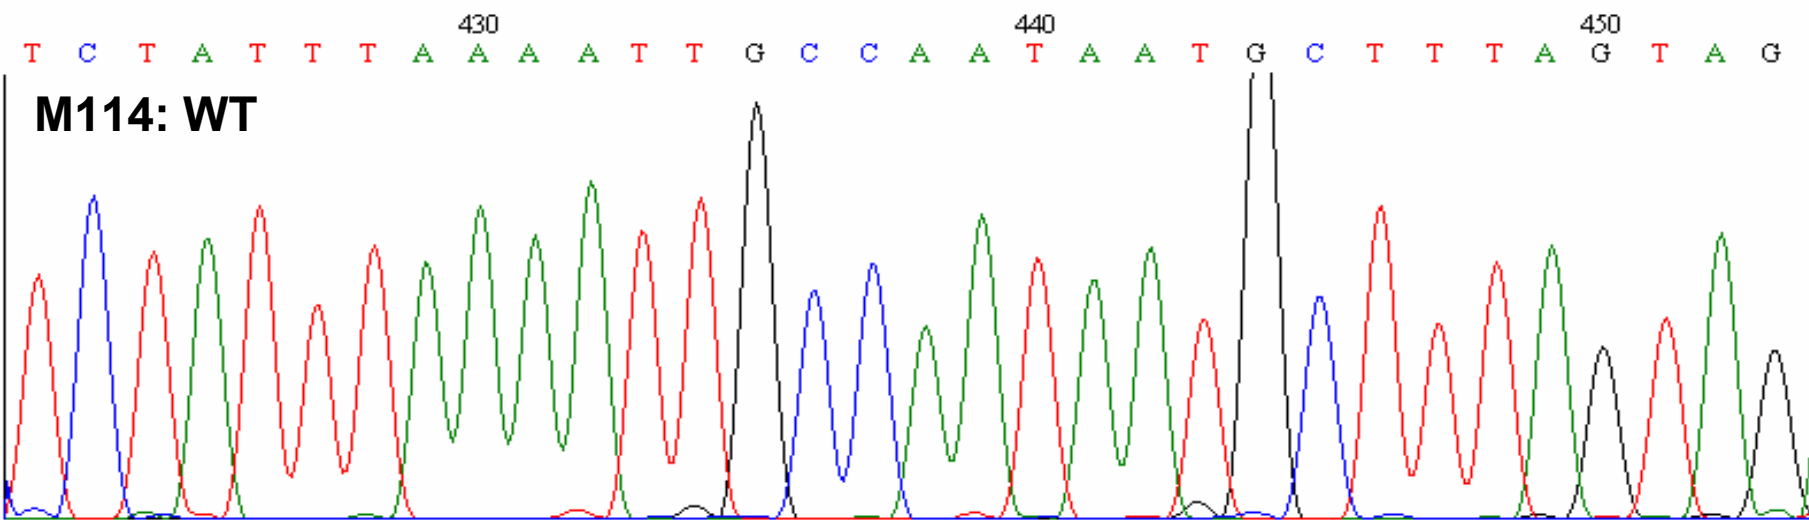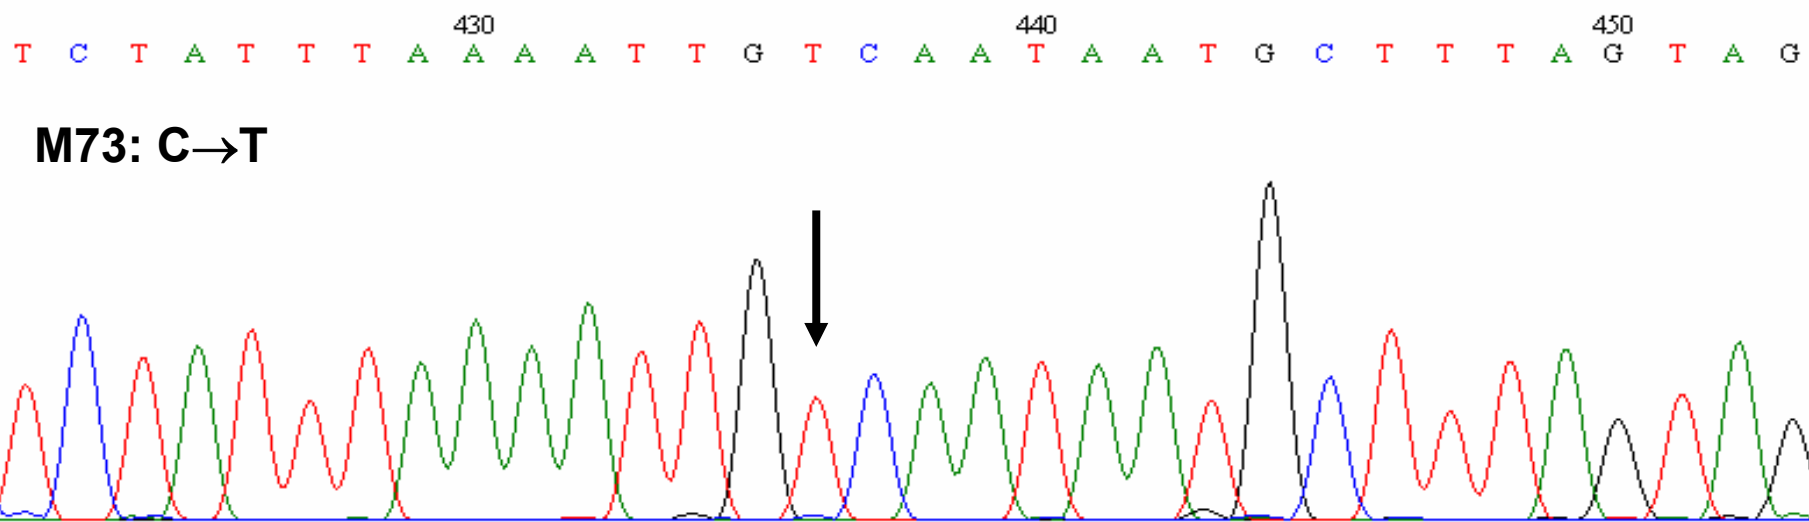

Position: 10,801 (NC)

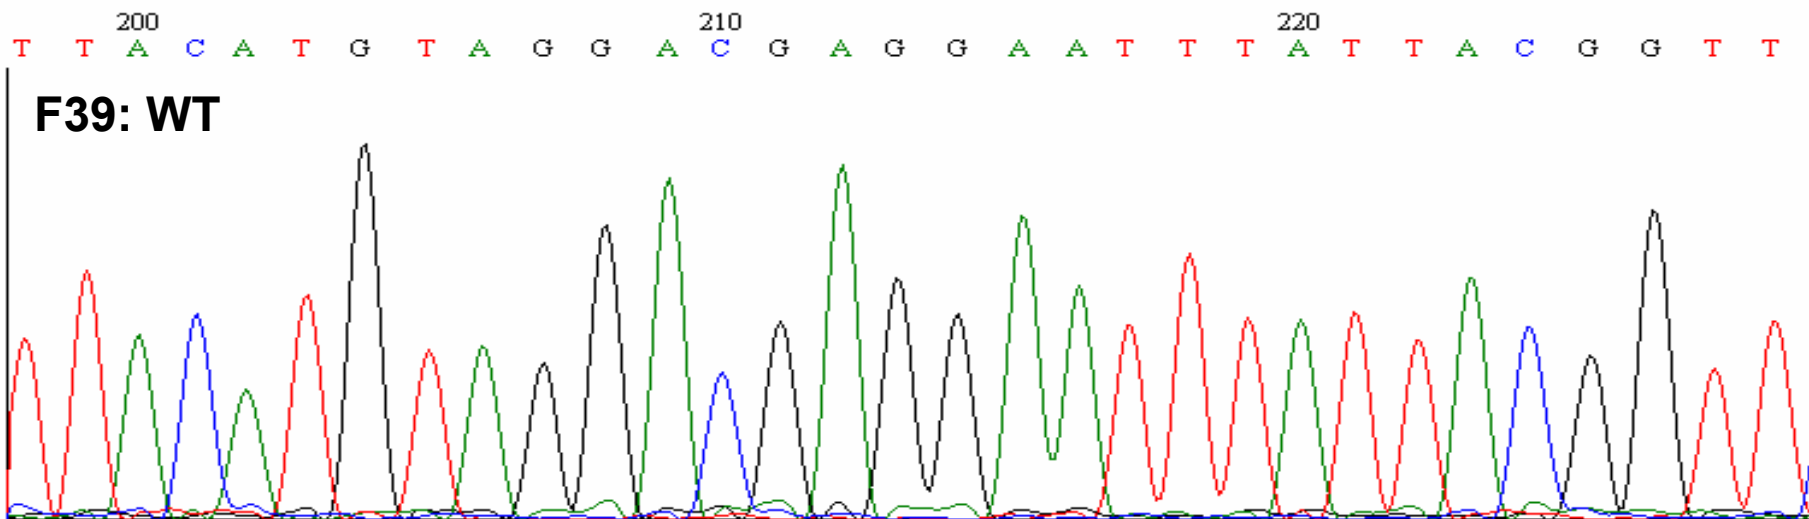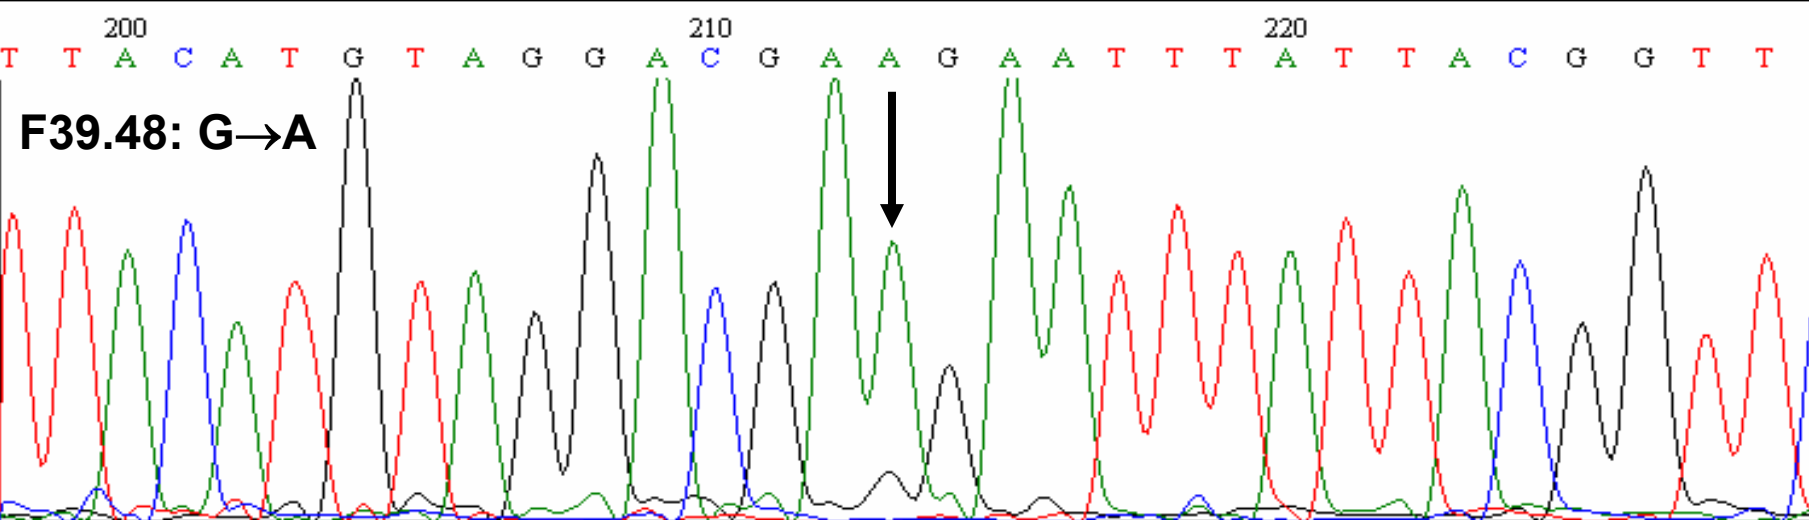

Position: 10,970

A G C T A T C C C T T A C T T A G G T A T A G A T T T A G T T C A

M38: WT

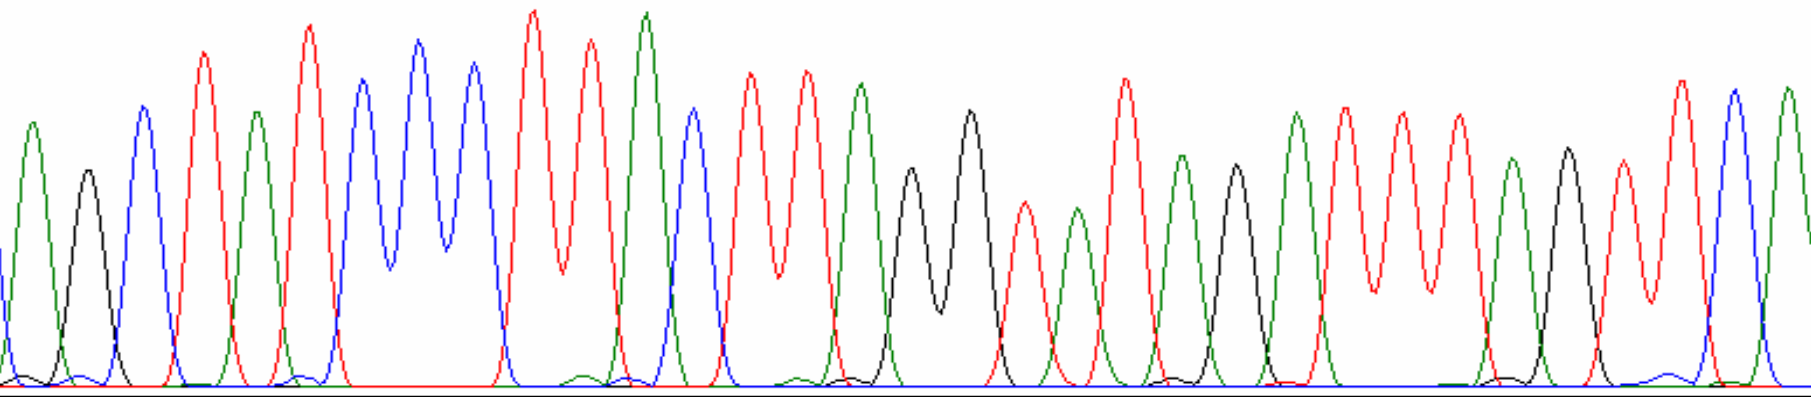

A G C T A T C C C T T A C T T A G G T A T A G A T T T A G T T C A

M77: G→A

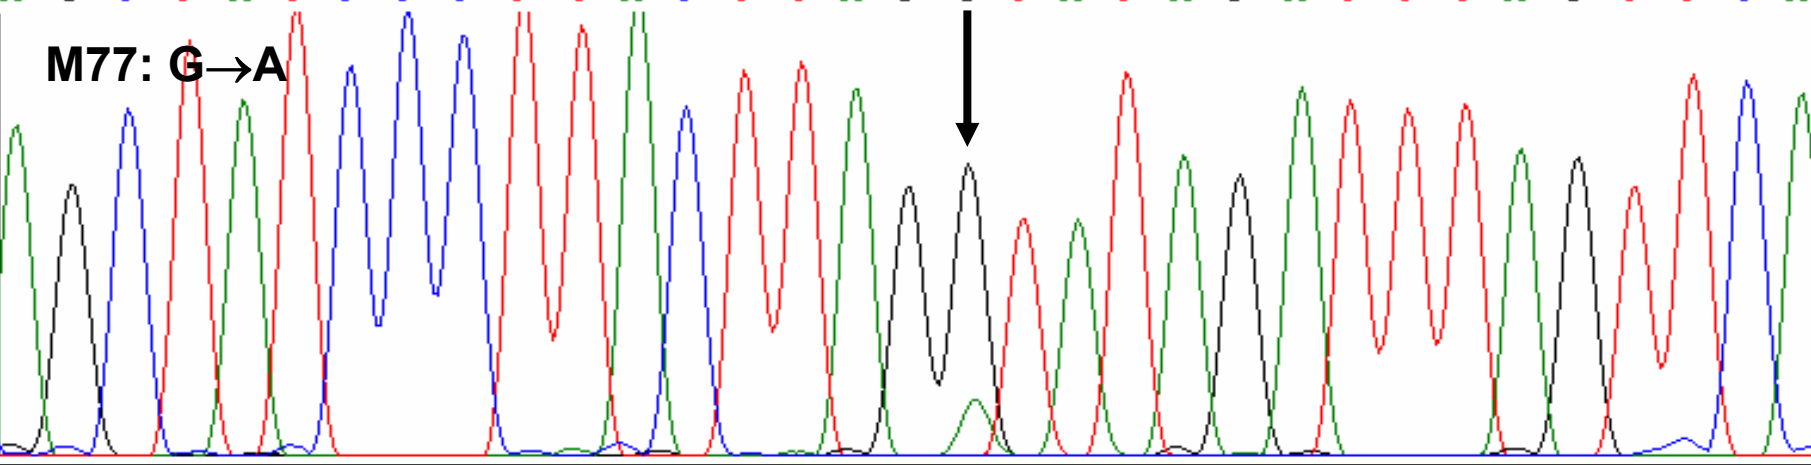

Position: 11,132

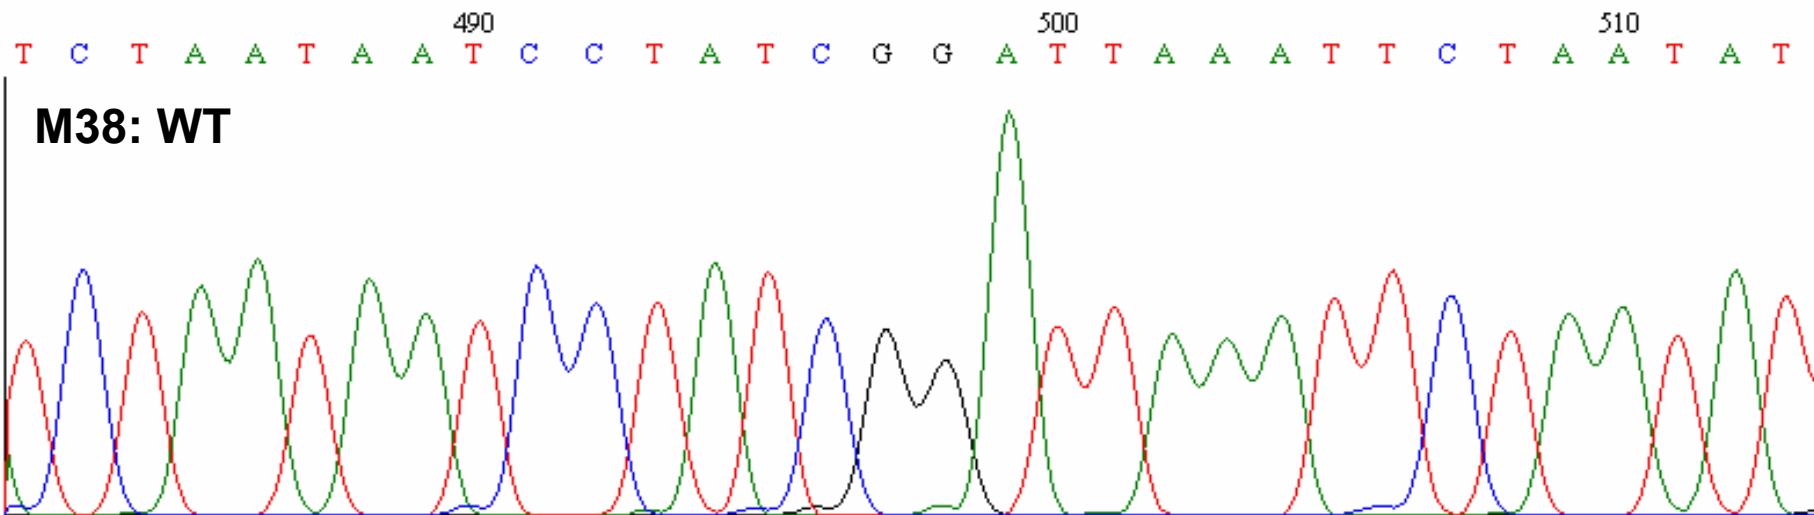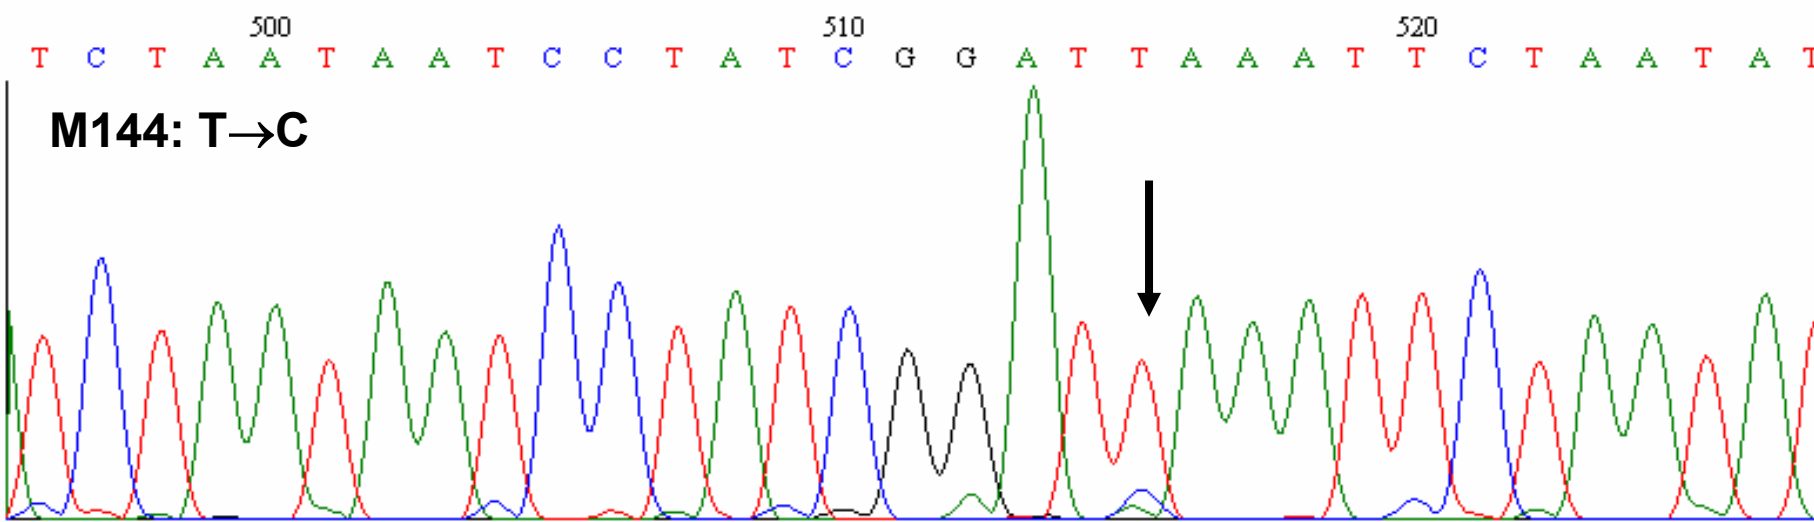



Position: 11,132

150 160  
A A T A T T A G A A T T T A A T C C G A T A G G A T T A

**M144: T→C**

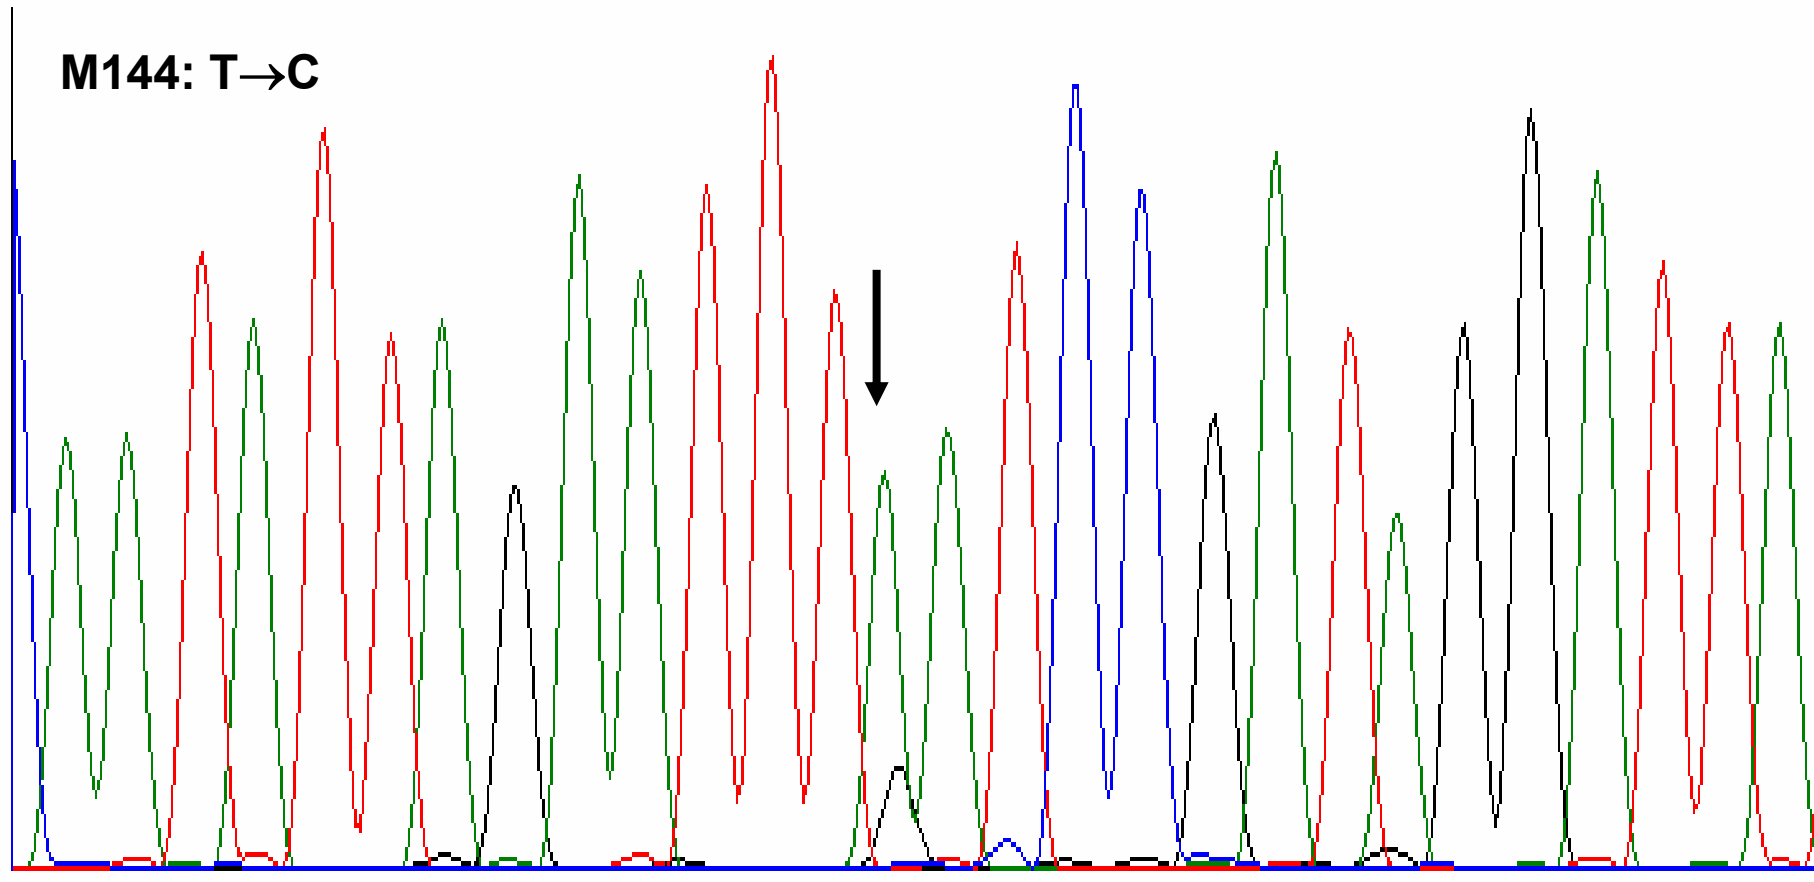

Same as previous mutation seen on reverse strand

Position: 11,542

T T G A A G A A C C T T A T G T A T T A A T T G G A C A A

80 90 100

**M63: WT**

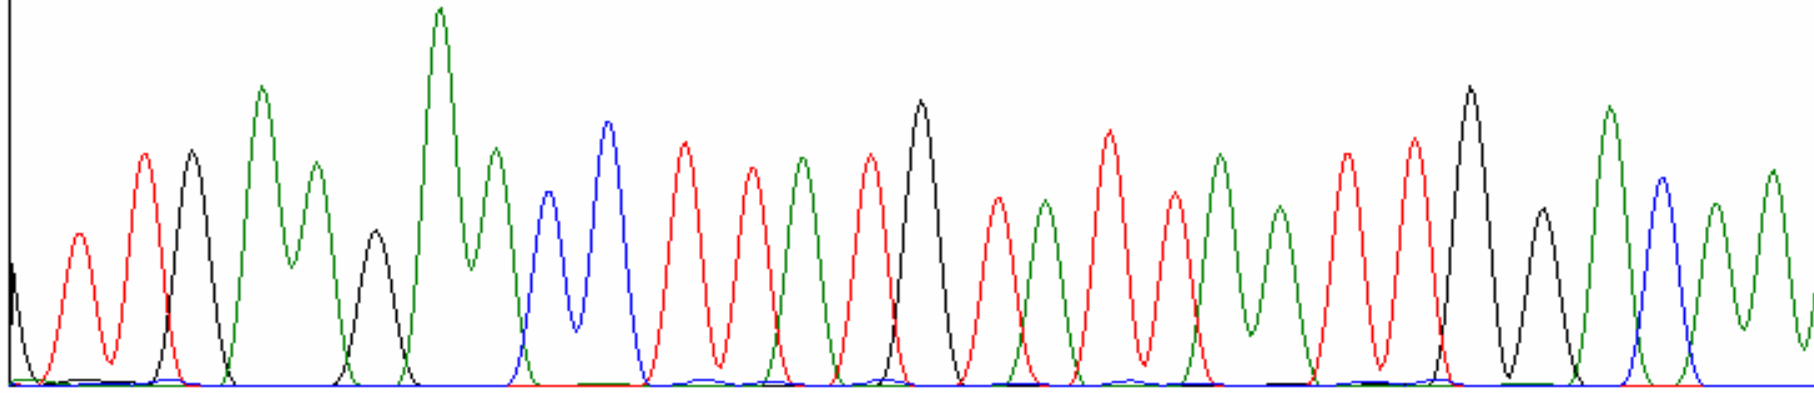

T T G A A G A A C C T T A T G T A T T A A T T G G A C A A

80 90 100

**M75: G→A**

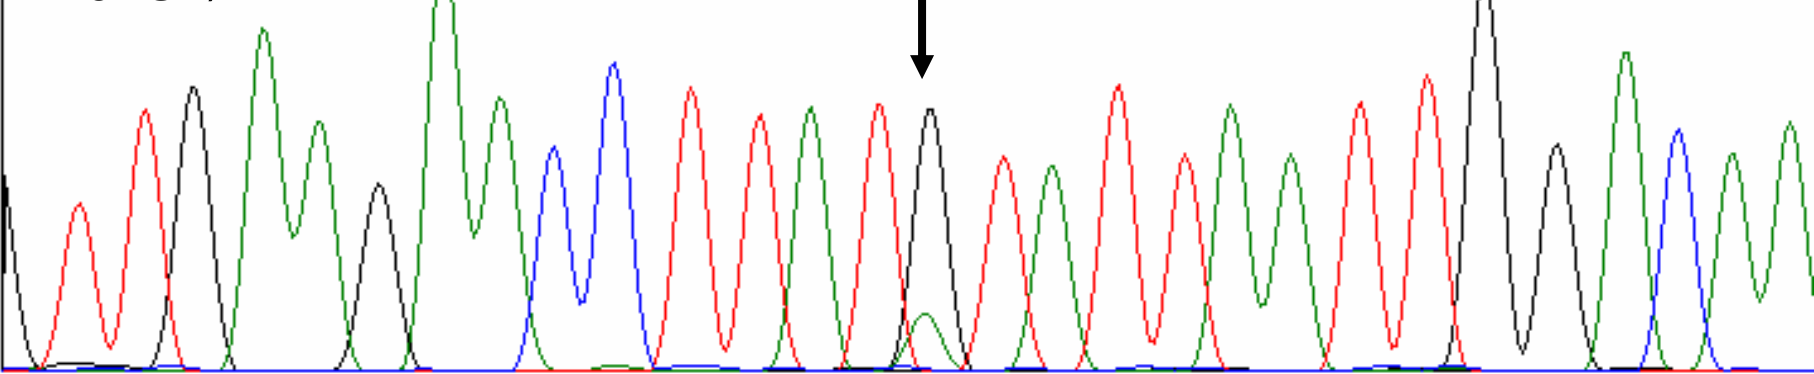

Position: 11,677

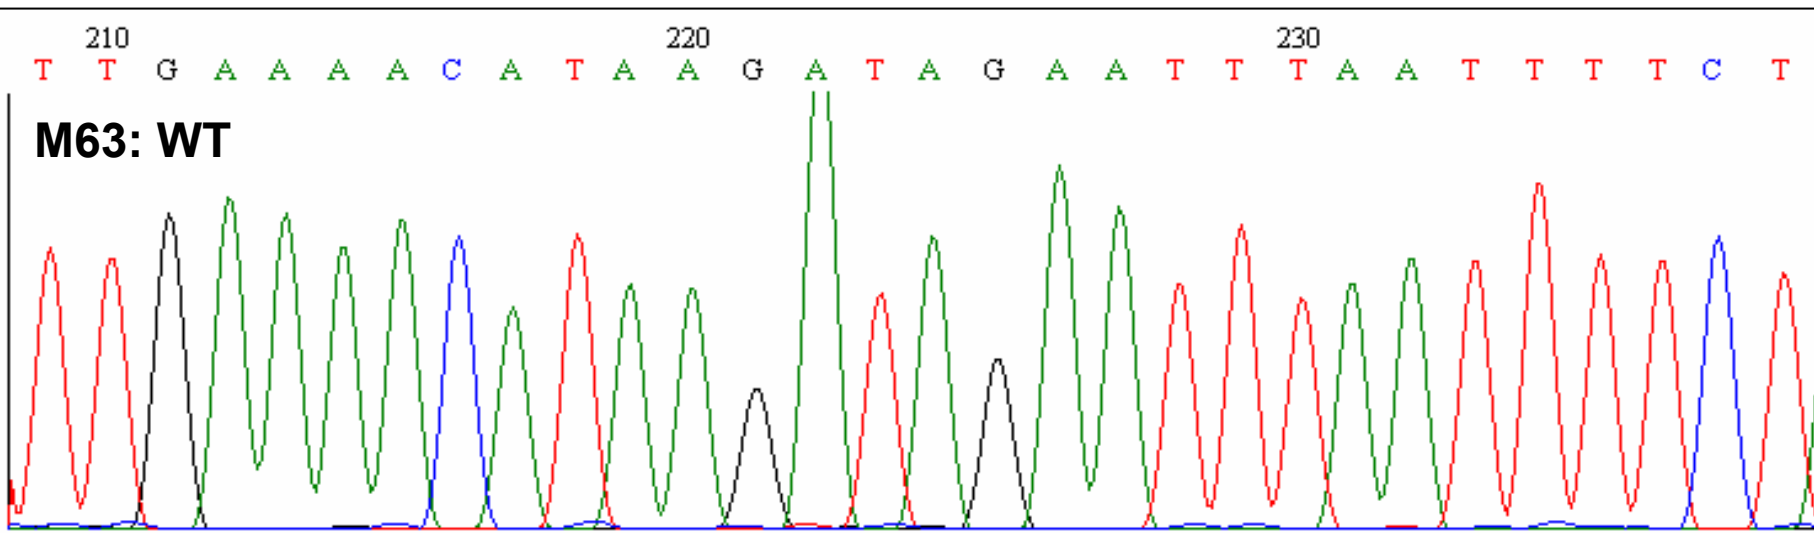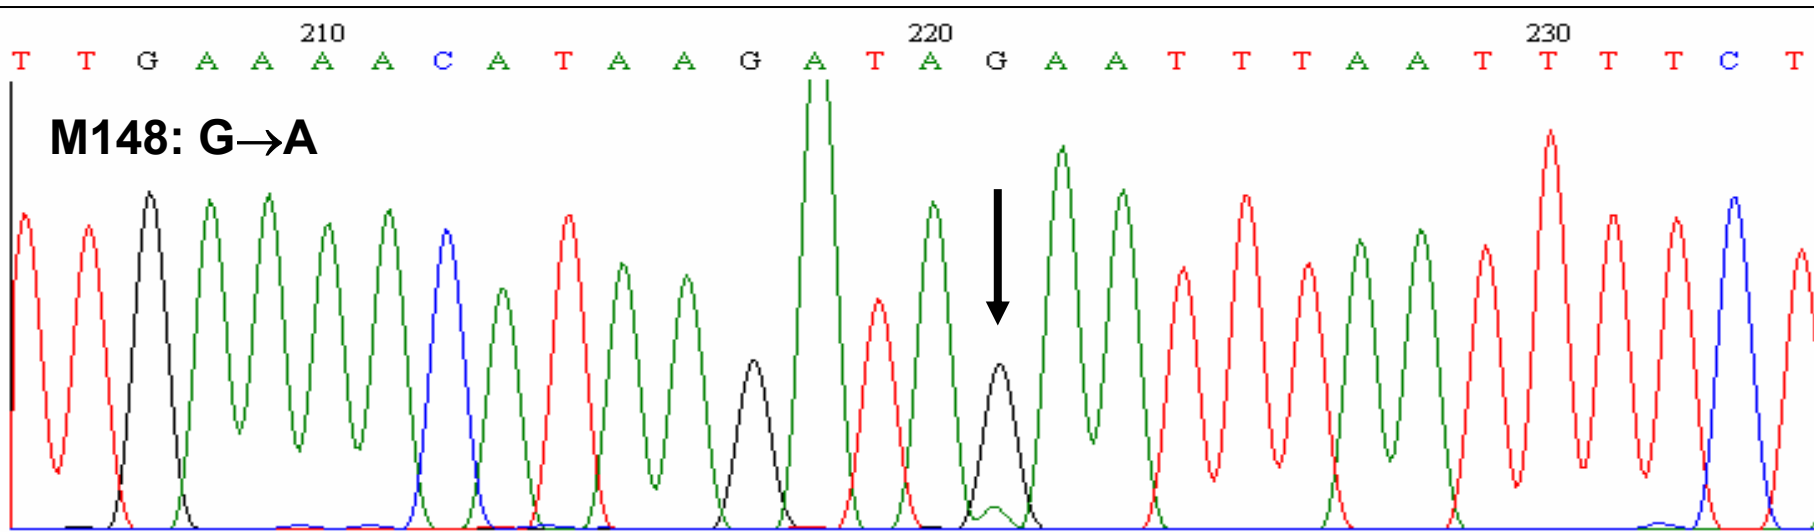

Found in two independent PCRs/sequences

Position: 11,708

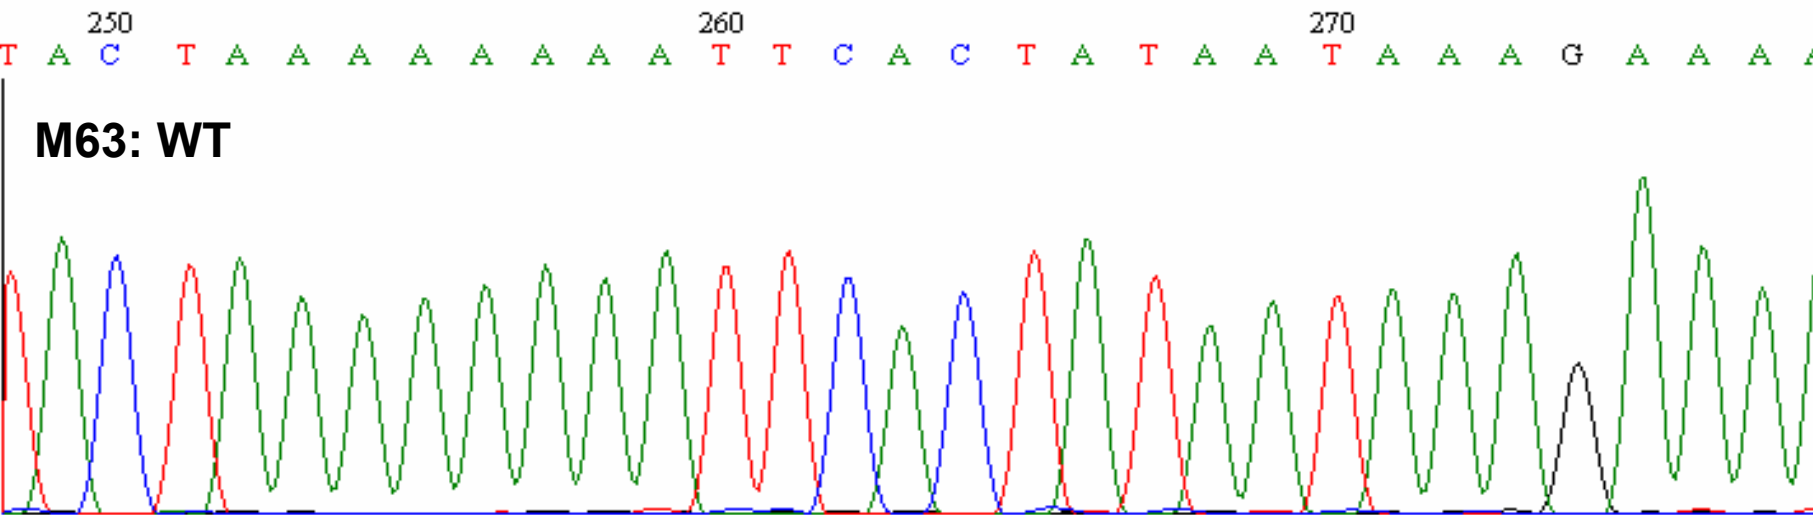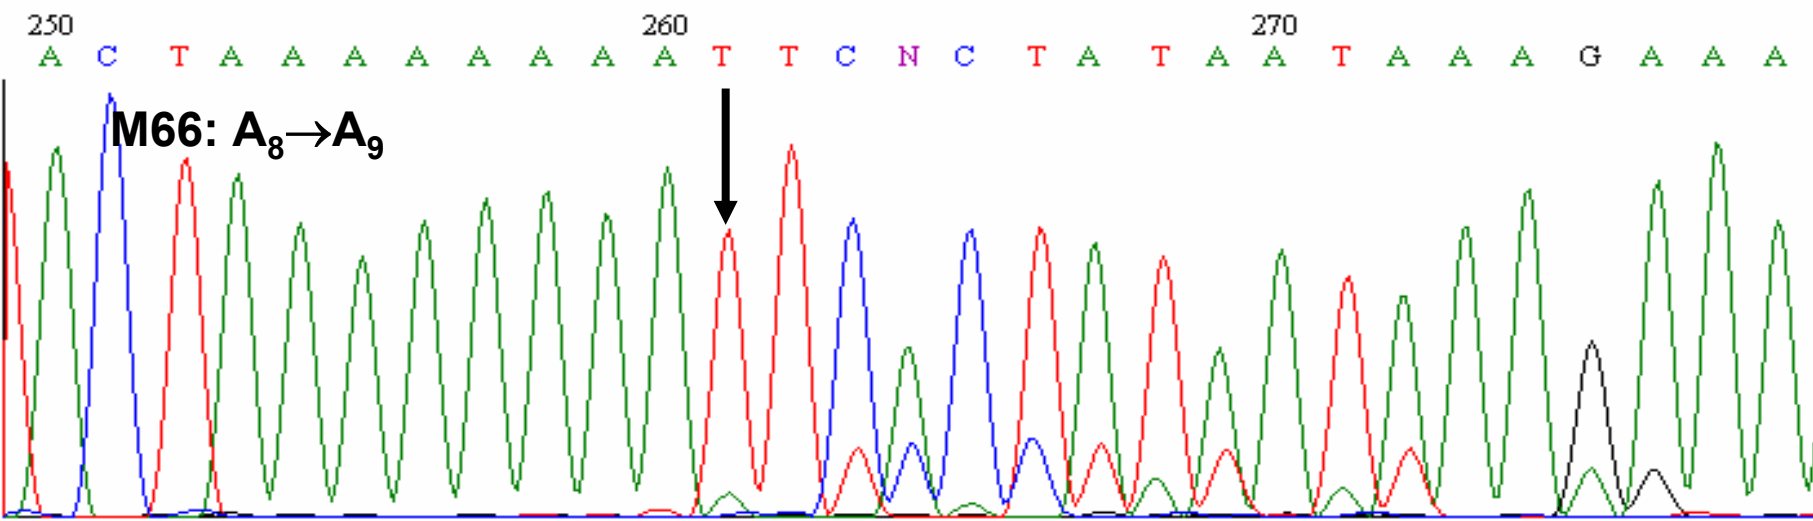

Position: 11,836

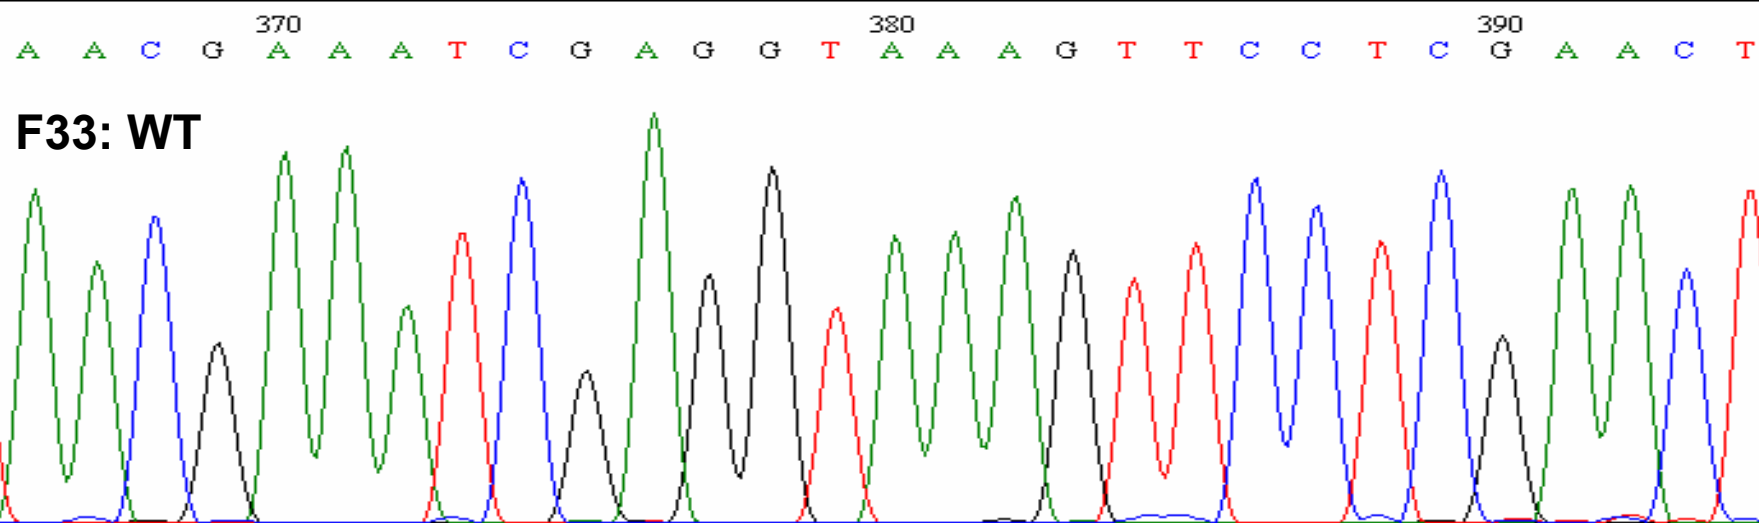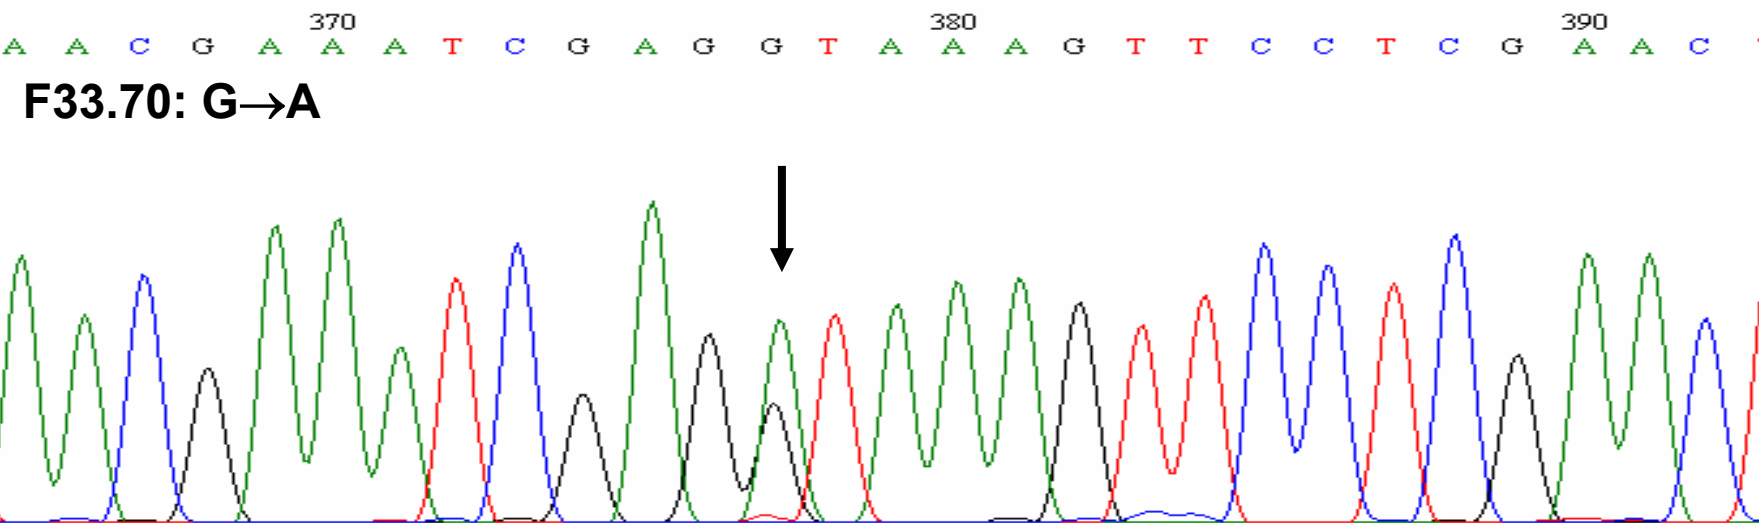

Position: 12,756

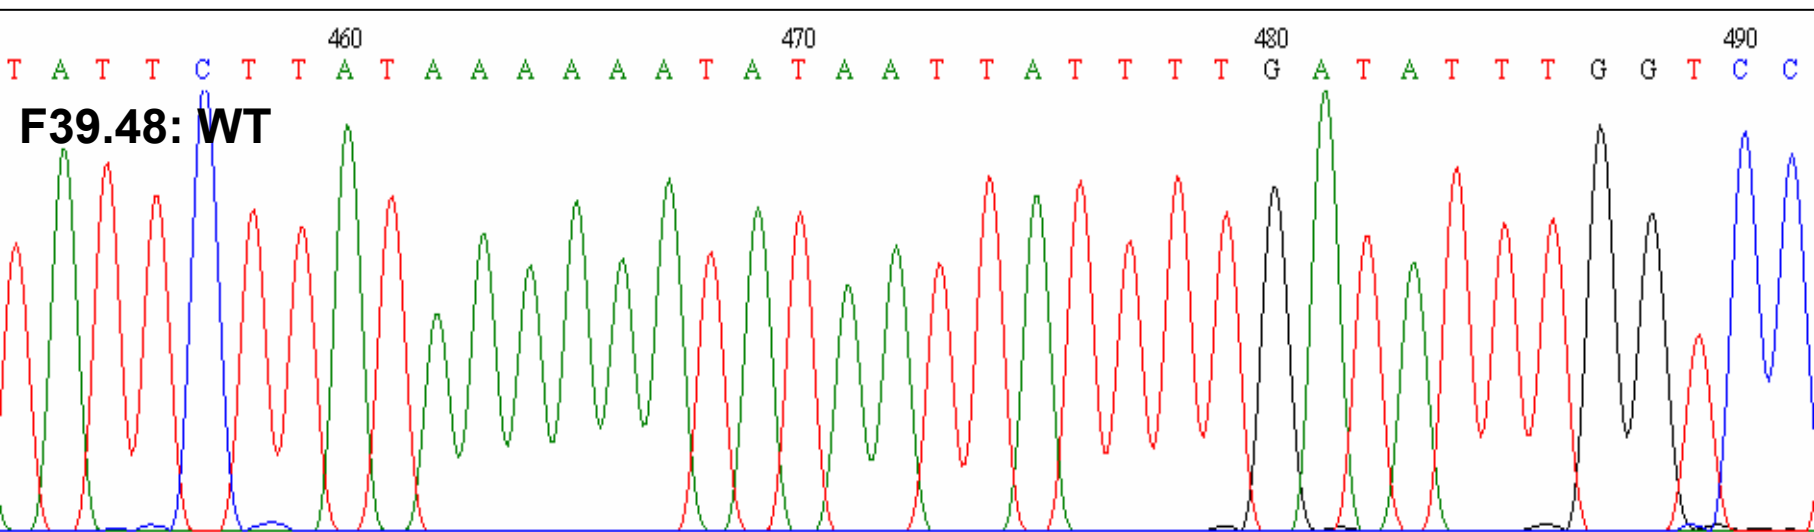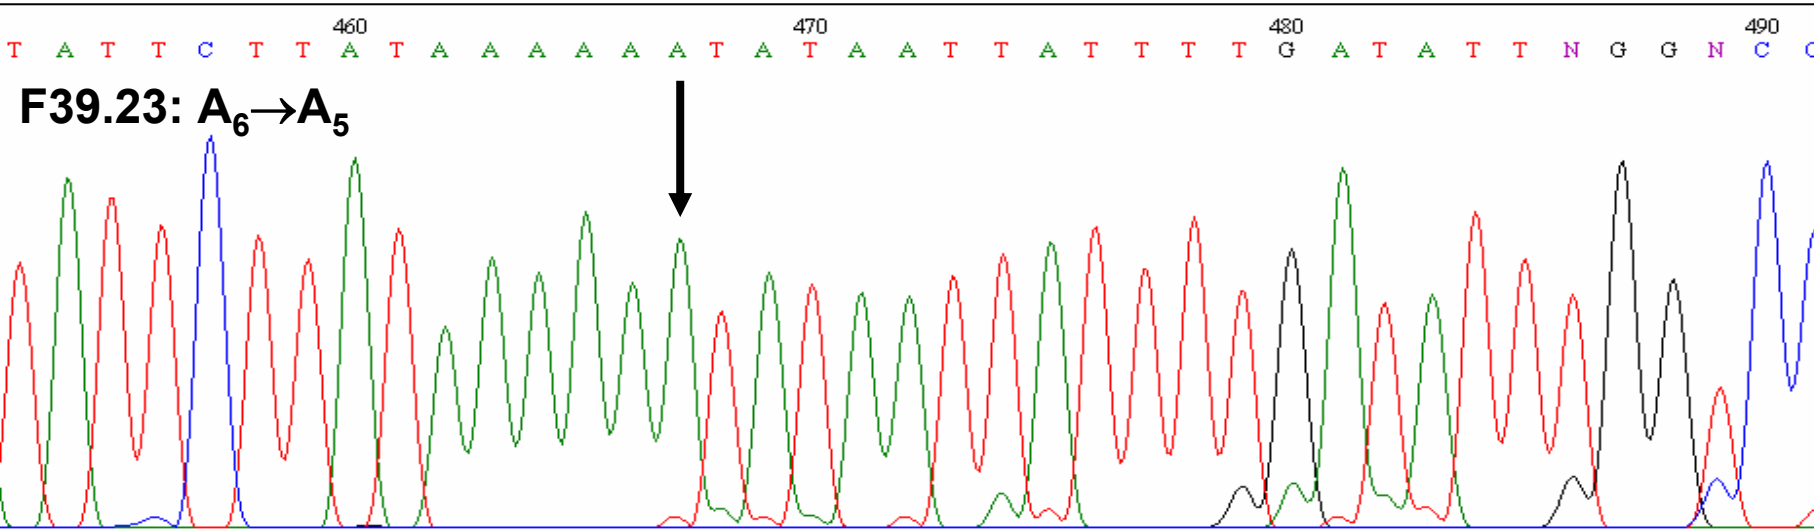

Position: 12,781

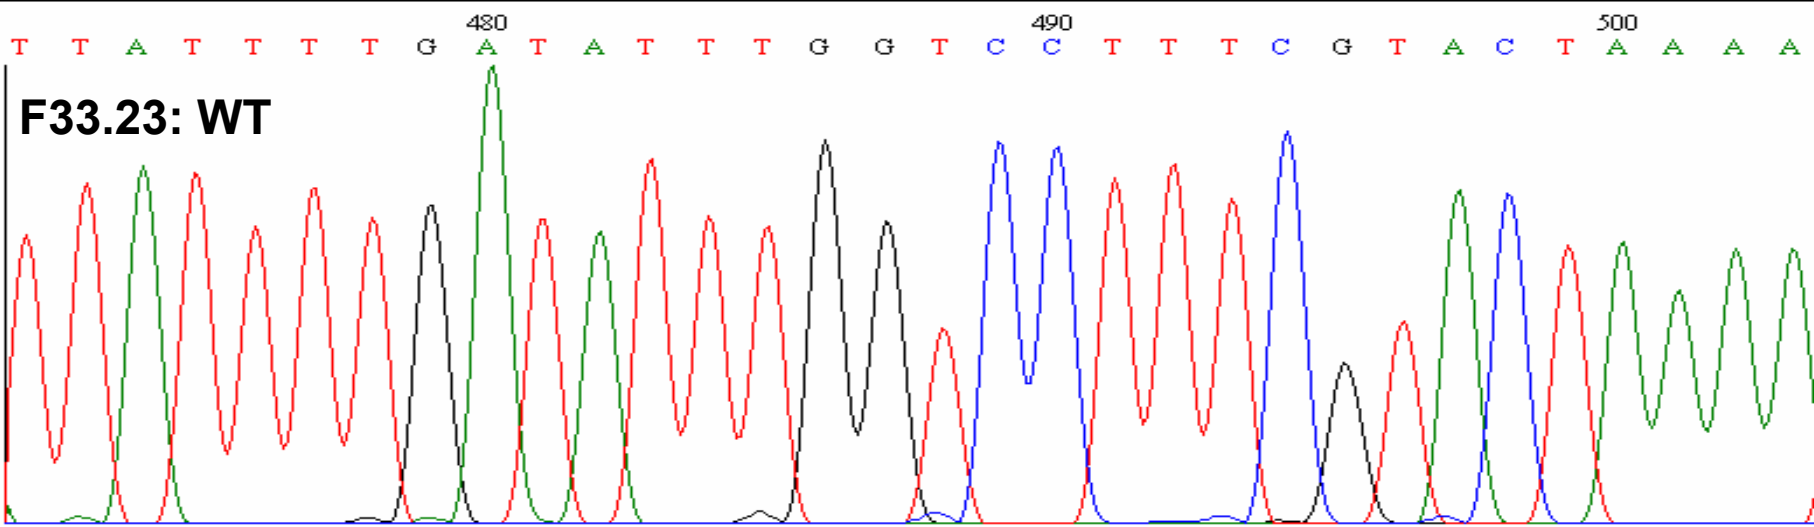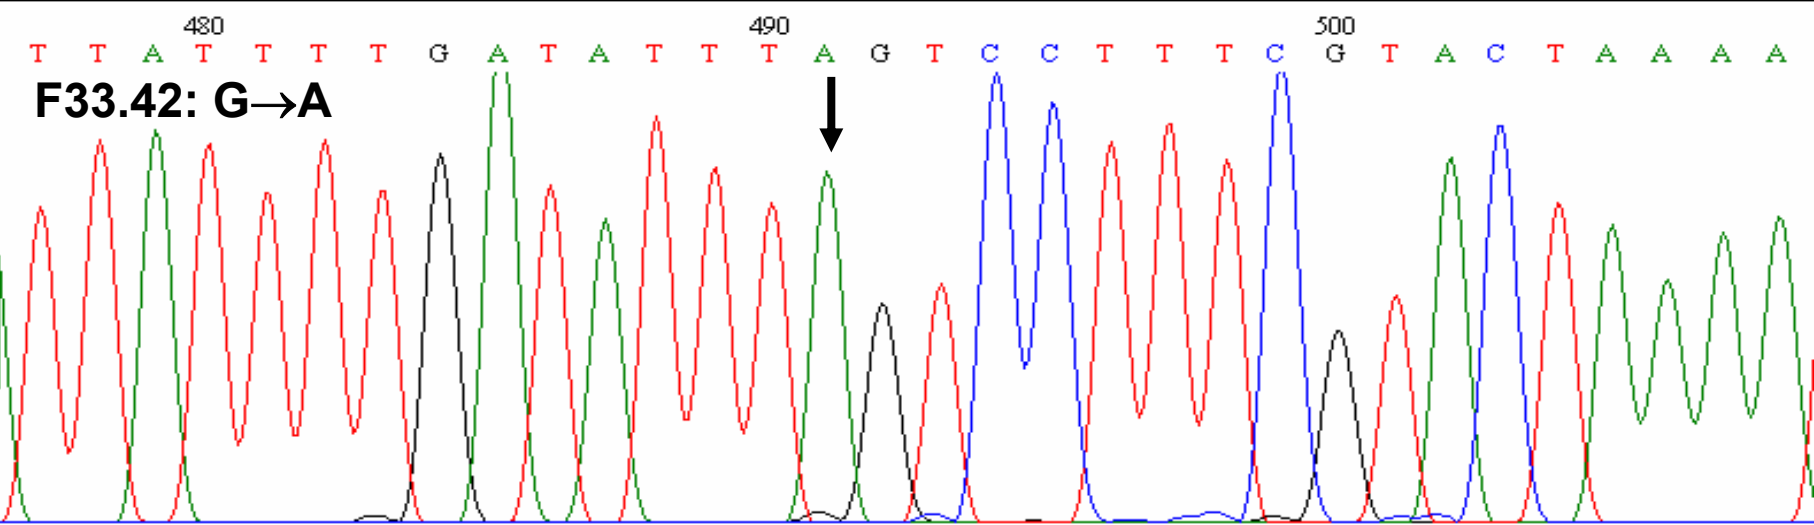

Position: 12,820

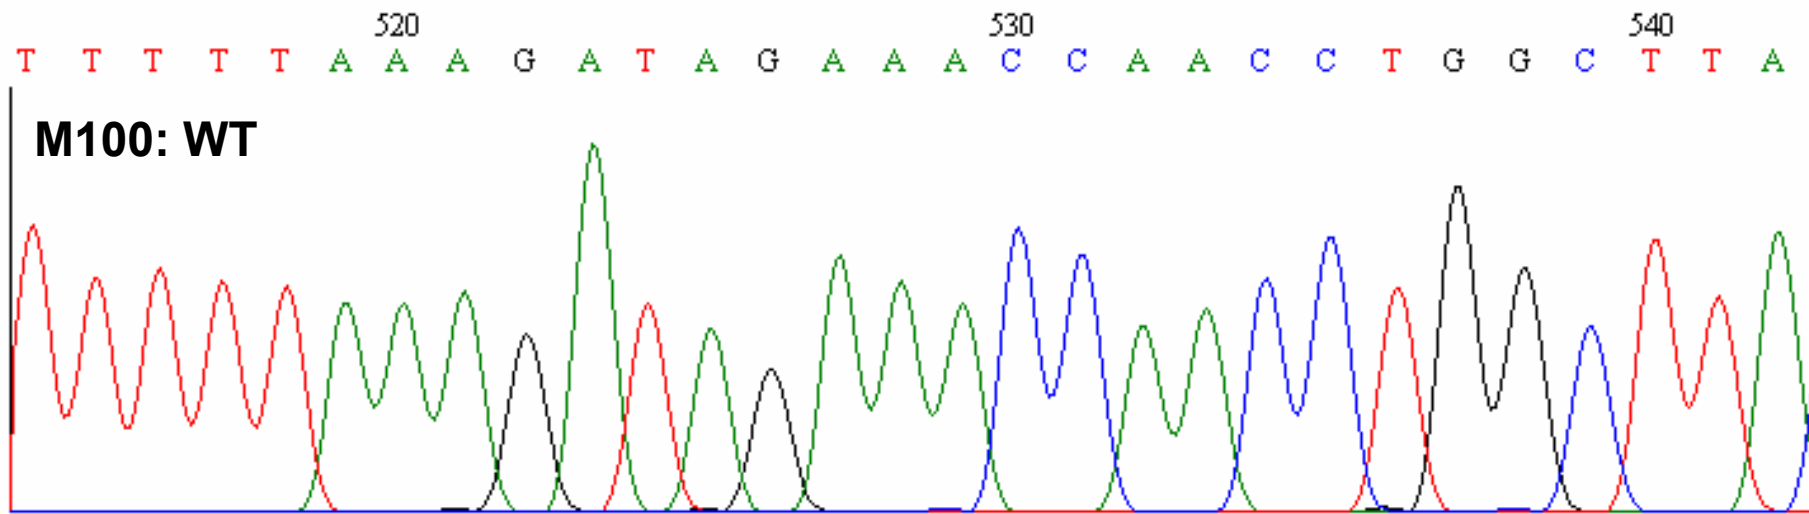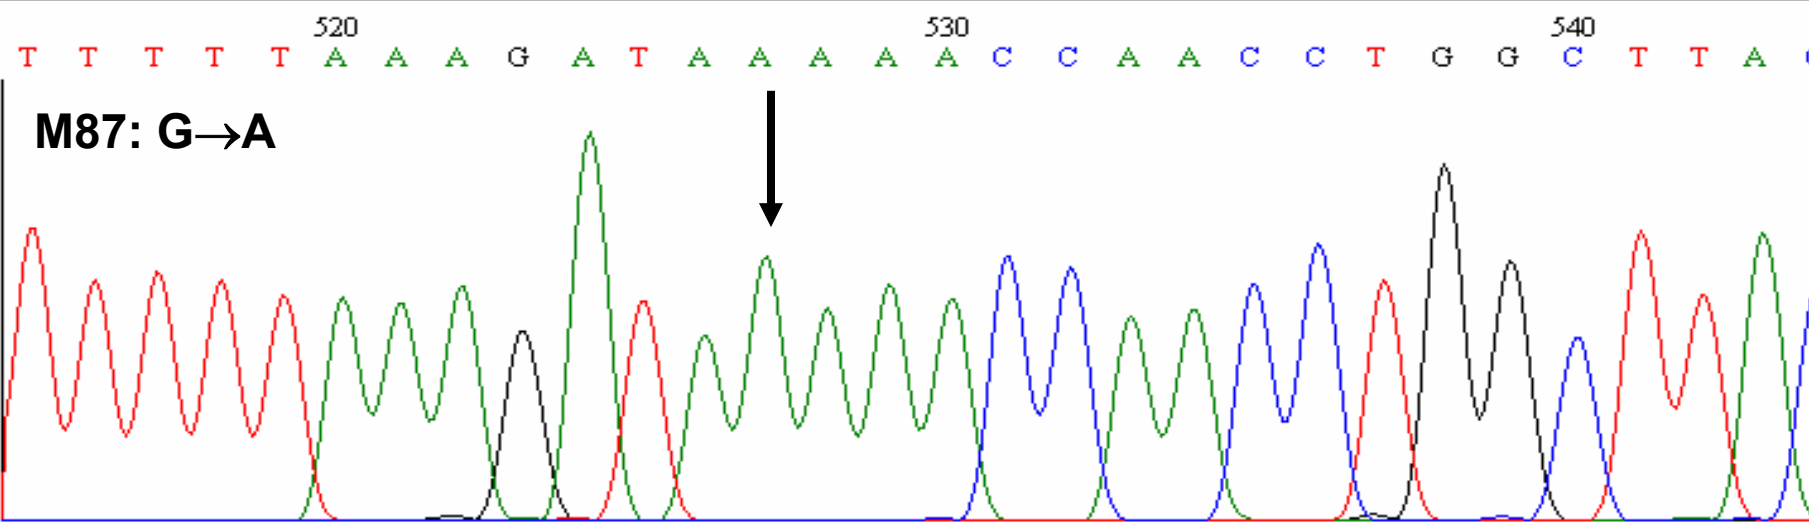



Position: 13,136

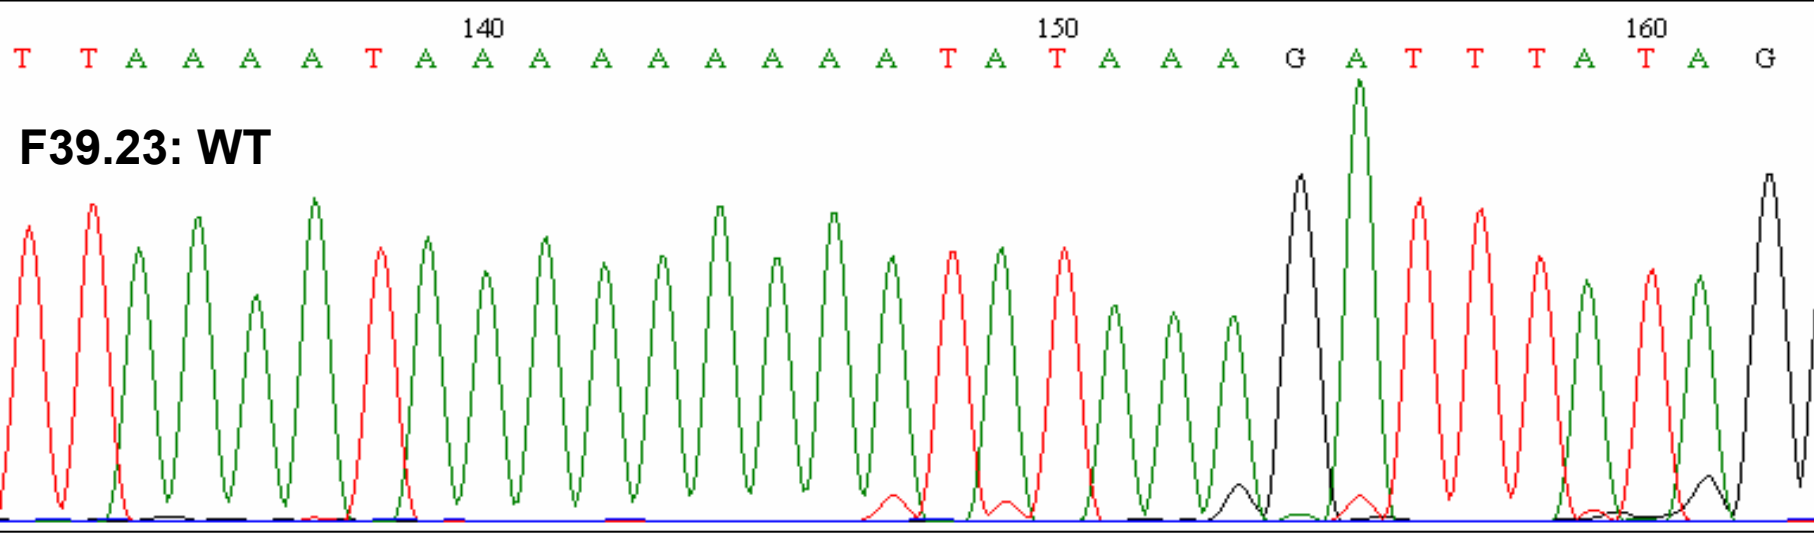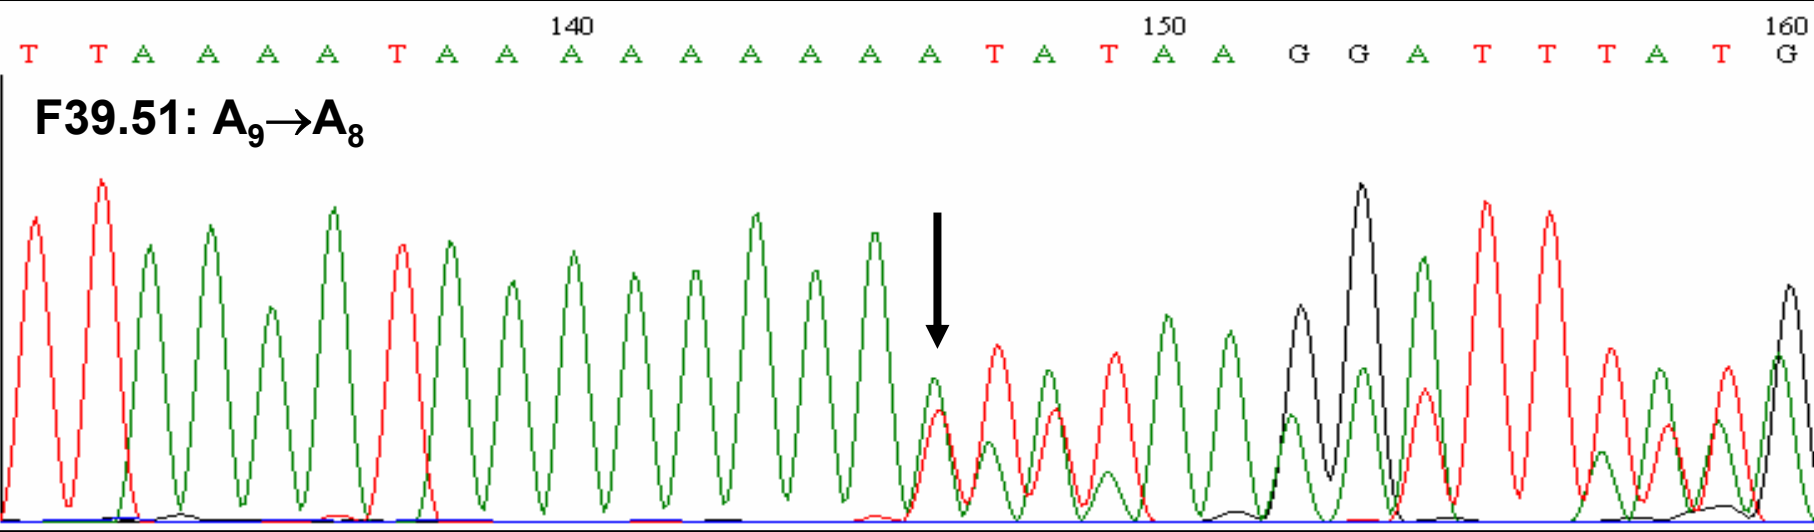

Position: 13,136

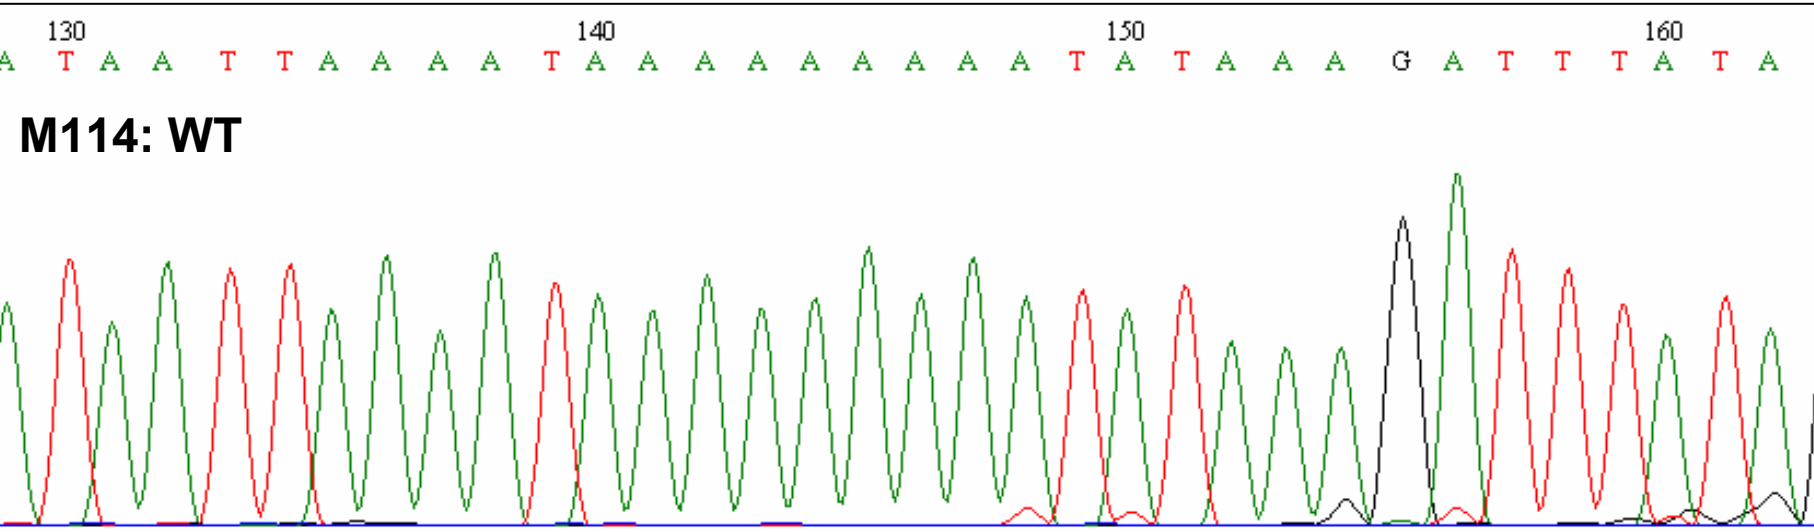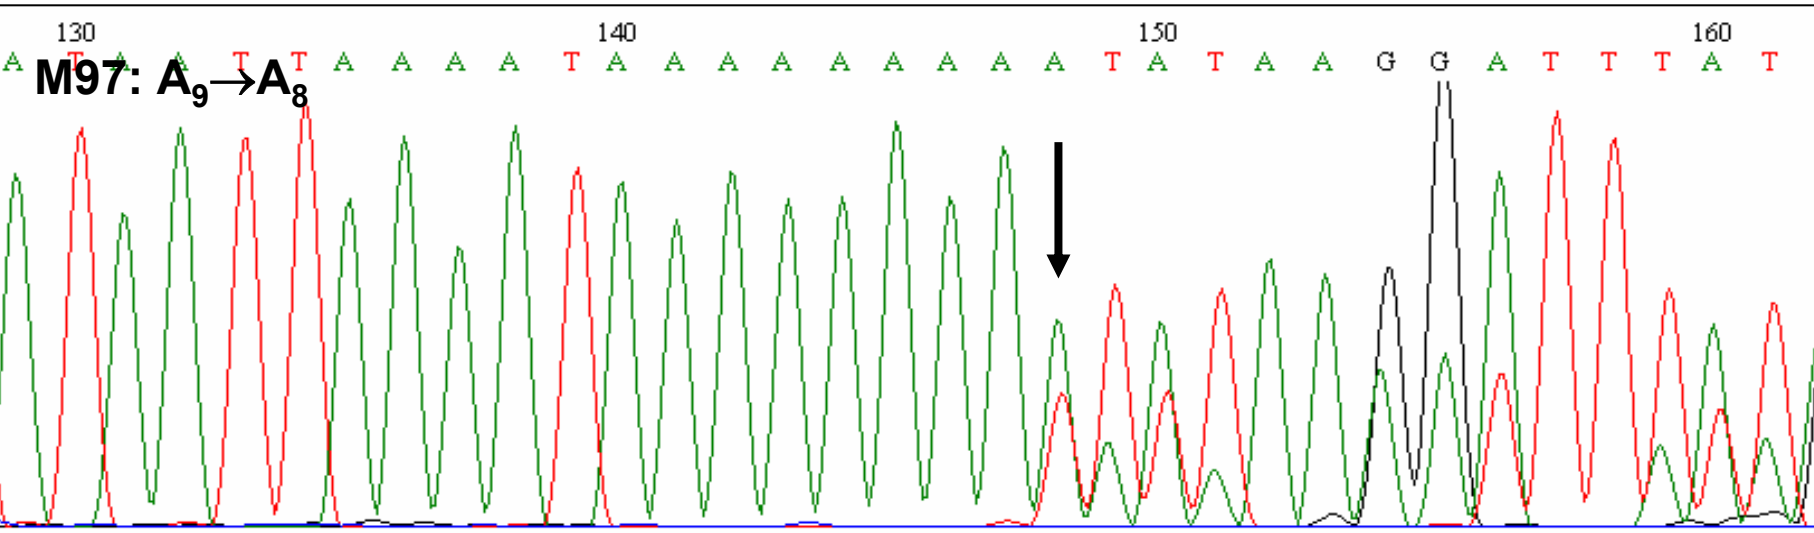

Position: 13,234

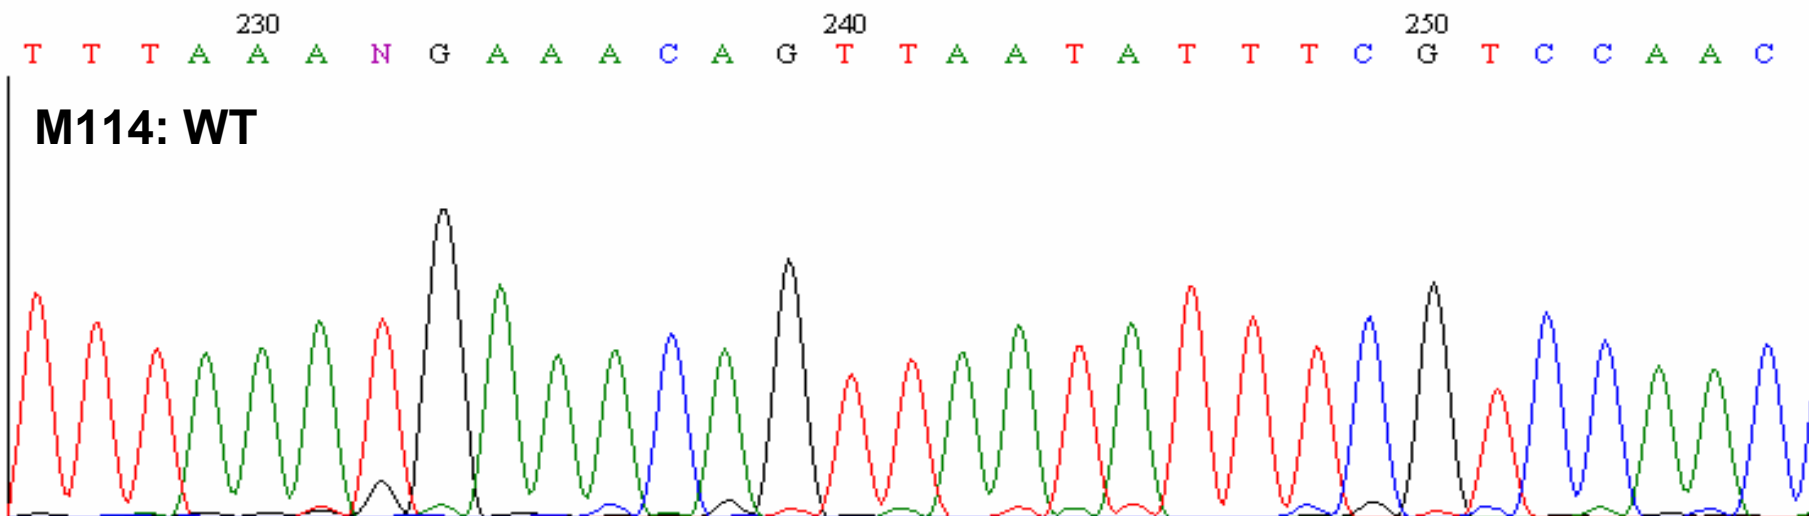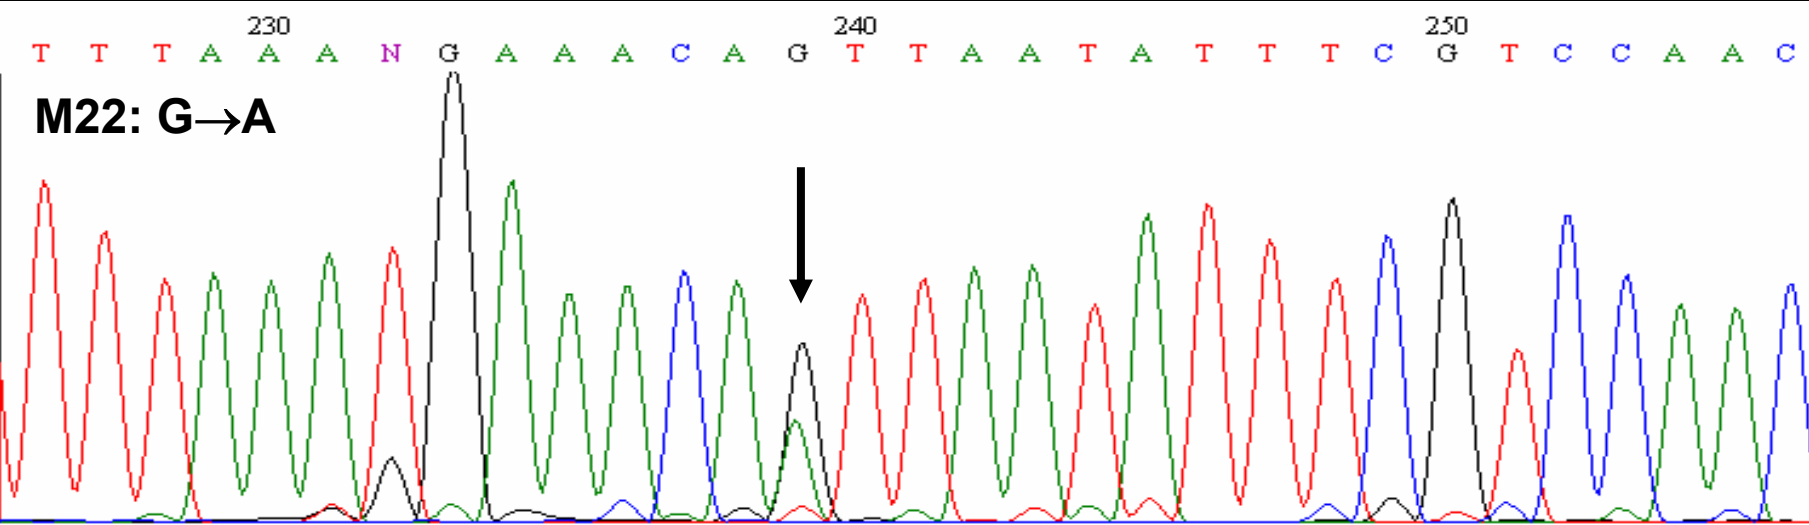

Position: 14,679

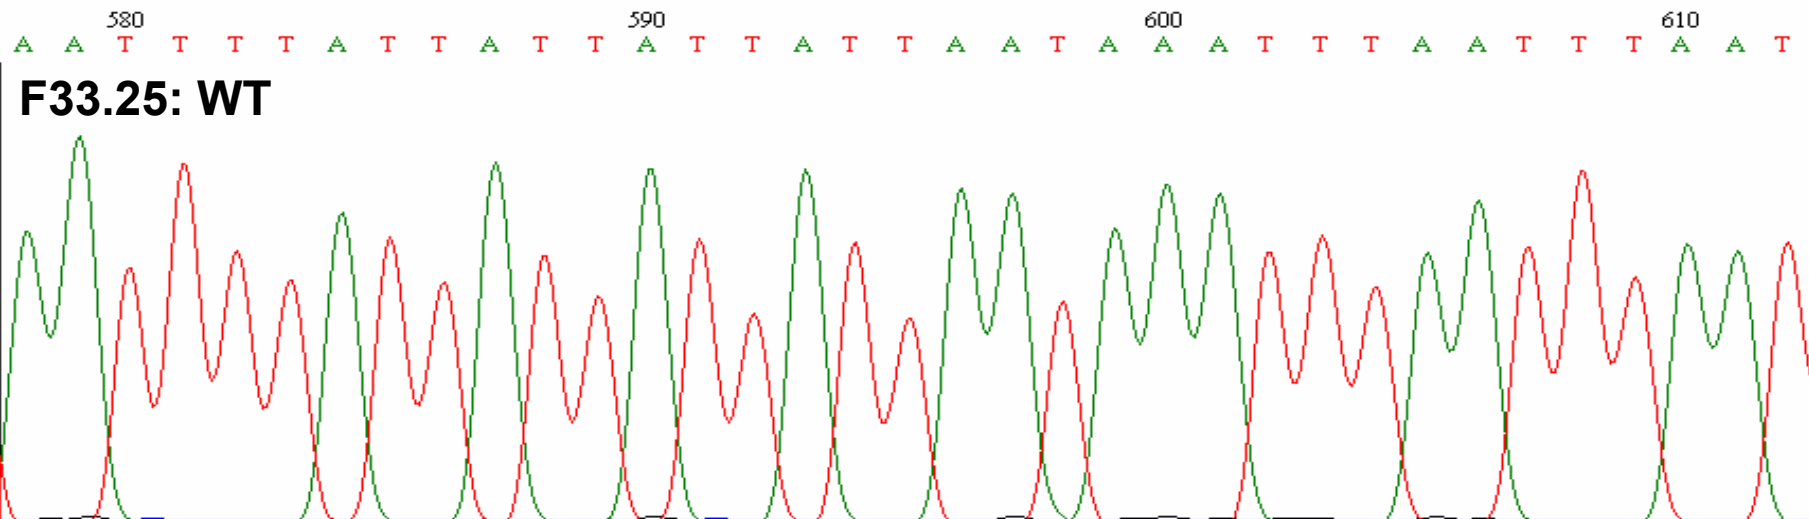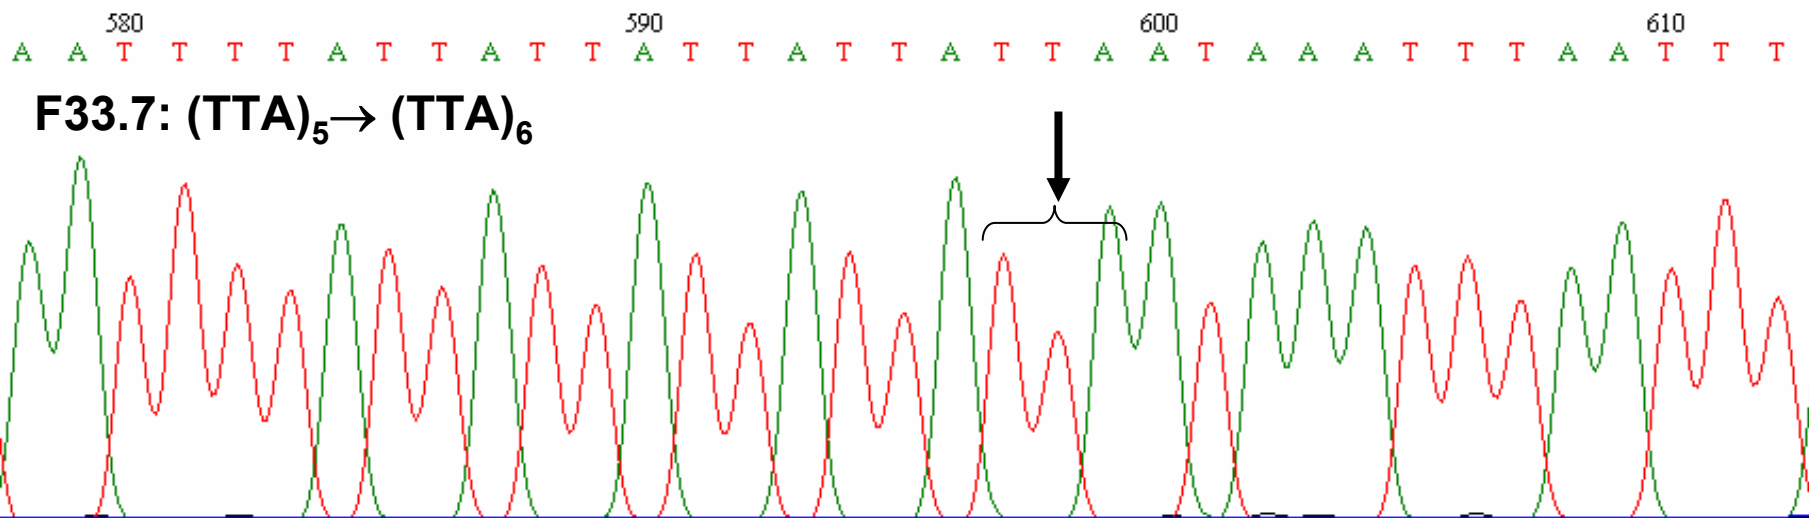

Supplement: pbio.0060204.sd001.pdf [file pbio.0060204.sd001.pdf]
