# Supplementary material
Source: PubMed Central journal article supplement (PMC2525680)
Supplement: pbio.0060204.st001.pdf [file pbio.0060204.st001.pdf]

**Table S1.** Regions of the *D. melanogaster* mt genome scanned by DHPLC and direct Sanger sequencing.

| DHPLC         |          |        | Sequencing    |          |        |
|---------------|----------|--------|---------------|----------|--------|
| Amplicon name | start 5' | end 3' | Amplicon name | start 5' | end 3' |
| NADH2a        | 12       | 761    | 339-1461      | 319      | 1479   |
| COIa          | 1579     | 2279   | 1005-1930     | 981      | 1950   |
| COIb          | 2288     | 2989   | 1852-2827     | 1827     | 2844   |
| COII          | 3005     | 3706   | 2783-3647     | 2761     | 3664   |
| ATPase 6-8    | 3650     | 4350   | 3598-4528     | 3570     | 4524   |
| ATPase6       | 4424     | 5124   | 4463-5442     | 4440     | 5438   |
| COIII         | 5140     | 5842   | 5314-6195     | 5288     | 6155   |
| NADH3         | 5911     | 6660   | 6143-6969     | 6061     | 6924   |
| NADH5a        | 6866     | 7614   | 6931-7740     | 6849     | 7701   |
| NADH5b        | 7670     | 8371   | 7852-8896     | 7776     | 8858   |
| NADH4         | 8549     | 9251   | 8780-9672     | 8704     | 9636   |
| NADH4L bis    | 9563     | 10196  | 10626-11573   | 10565    | 11538  |
| NADH6         | 10070    | 10620  | 11355-12329   | 11276    | 12294  |
| Cytb          | 10595    | 11323  | 12312-13356   | 12236    | 13302  |
| NADH1a        | 11421    | 12120  | 13321-14251   | 13246    | 14196  |
| NADH1b        | 12263    | 13011  | 14266-14787   | 14149    | 14756  |
| ribosome2     | 12968    | 13268  |               |          |        |
| ATregion1     | 14054    | 14736  |               |          |        |
