# Supplementary material
Source: PubMed Central journal article supplement (PMC2525680)
Supplement: pbio.0060204.st002.pdf [file pbio.0060204.st002.pdf]

**Table S2.** Details of mutations in Florida lines detected by DHPLC, but not by direct sequencing, and *vice versa*.

| <i>Line</i> | <i>Position</i> | <i>Detected by:</i> |                   | <i>Frequency</i> |
|-------------|-----------------|---------------------|-------------------|------------------|
|             |                 | <i>DHPLC</i>        | <i>Sequencing</i> |                  |
| F33.122     | 7,382           | Yes                 | No                | 0.18             |
| F39.48      | 10,801          | No                  | Yes               | 0.87             |
| F33.70      | 11,836          | Yes                 | No                | 0.54             |
| F39.23      | 12,756          | Yes                 | No                | 0.15             |
| F39.51      | 13,136          | Yes                 | No                | 0.45             |
| F33.7       | 14,679          | Yes                 | No                | 1.0              |
