# Supplementary material
Source: PubMed Central journal article supplement (PMC2525680)
Supplement: pbio.0060204.st003.pdf [file pbio.0060204.st003.pdf]

**Table S3.** Primers used for PCR amplification in mutation scanning by direct sequencing and DHPLC.

| <b>Direct sequencing approach</b> |                            |                            |
|-----------------------------------|----------------------------|----------------------------|
| Locus Name                        | F-primer                   | R-primer                   |
| 339-1461                          | GGTTAGGAGCTTGAATAGG        | CGCGGTTATTGATTAAGTGGC      |
| 1005-1930                         | GGAGGACTACCCCATTTTTAGG     | GTCCTAGAATTGAAGAAATTCC     |
| 1852-2827                         | CGGAGCTGGAACAGGATGAACTG    | GTTGATCCAATAGTAGACAC       |
| 2783-3647                         | GGATTAGCTGGAATACCTCG       | CCATAAAATAAACCTGGTGC       |
| 3593-4528                         | GAACAGTTCCCGCTTTAGGAG      | GCAGTTAATCGGACAGCTAATGTCCC |
| 4463-5442                         | GCTCACTTAGTCCCTCAAGG       | CATGCAGCTGCTTCAAATCC       |
| 5314-6195                         | GCTCCATTTACTATTGCGGACTC    | CATTAACAGTGATACGCCTC       |
| 6143-6969                         | GAAGCGATTGATTGCAGTTAGTTTCG | CTGGGGATTTAAATTGTGG        |
| 6946-7674                         | AGTATAATTCAACTTTCATC       | TACAAAATGAATTTGAAATG       |
| 8780-9672                         | GAGCAACAGATGAATAAGC        | GAGTATGTGAGGGAGCTTTAGG     |
| 10641-11573                       | CCAGCTCCAATTAATATCTC       | GGTTCTTCGACTGGTCGAGCTCC    |
| 11355-12329                       | GCTAATCCTTTAGTTACACCTGC    | GCTGGTTGATCTTCTAATTC       |
| 12312-13356                       | GAGCTACAGCTCGTAAACCTCC     | GCCGCAGTATTTTACTGTGC       |
| 13321-14251                       | CGTCCAACCATTTCATTCCAGC     | ATGTACACATCGCCCGTCGC       |
| 14226-14787                       | CCAGTACATCTACTATGTTACG     | CCAAATTGGTGCCAGCAGTCGCGG   |
| <b>DHPLC approach</b>             |                            |                            |
| Locus Name                        | F-primer                   | R-primer                   |
| NADH2a                            | TGATAAAAAGGATTACCTTG       | AATTTTCGTAAAGAAGTTTG       |
| COIa                              | CGAGCTGAATTAGGACATCC       | GAGAACCAAAAGTTTCCTTTTTTCC  |
| COIb                              | TTTATGCTATATTAGCTATTG      | TTCAGAATATCTATGTTTCAG      |
| COII                              | ATTAATTTCTAATATGGCAG       | GGTATAAATCTATGATTAGC       |
| ATPase 6-8                        | GGTTTATTTTATGGTCAATG       | TGTTCTTGTA AAAAATATATGG    |
| ATPase6                           | TACACAACATATATTTGCTC       | TTTGAAATGGATTAAATGAG       |
| COIII                             | AGCTATTTTATTAGCTTCAG       | AATTATAGGTAGAATTAATGC      |
| NADH3                             | ATTGGATTATACCATGAATG       | TTAAGA ACTTTTTTAGGGTC      |
| NADH5a                            | AGTATAATTCAACTTTCATC       | TACAAAATGAATTTGAAATG       |
| NADH5b                            | GAAAGAAGTAAAGCTACATC       | CTGCTTATACTTTATATTTATATTC  |
| NADH4                             | AATTAATATTCTTCGACTTC       | TTGTTGATTTTAACTTTTTTC      |

|               |                            |                           |
|---------------|----------------------------|---------------------------|
| NADH4L<br>bis | TGAAAATAATCATTACCATGAGTACG | TCATTAGAGGCTAAAGATGTTACG  |
| NADH6         | CAATTTTTGTATGTTACTAAC      | CATAATCCAAGTAATGATCC      |
| Cytb1         | ATTTTGGATCATTACTTGGATTATG  | AAAATATCATTCTGGTTGAATATGG |
| NADH1a        | TAATTTAAGAAAATTCCGAG       | TTATTTTATTTCCCTATAGCTTTAG |
| NADH1b        | AGCATAATTAGAATTAGACG       | GATTAAAAAATTAAGTTACTTTAGG |
| ribosome 2    | AAAAATTACGCTGTTATCCCTAAAG  | AGGCTGGAATGAATGGTTGG      |
| ARegion1      | CTAACTCAATTTATATTGATTTGC   | CGCGGTTATACCATTAATAC      |

---
